# Supplementary material for: An electrochemical multicomponent cascade annulation and functionalization reaction to enable C(sp3)–H trifluoromethylation
Source: Royal Society of Chemistry journal article supplement (doi:10.1039/d3qo01684f), 2023-12-22
Supplement: d3qo01684f1.pdf [file d3qo01684f1.pdf]

## Supplementary information

### **Electrochemistry enabled multicomponent cascade annulation and functionalization reaction to enable C(sp<sup>3</sup>)-H trifluoromethylation**

Yuxin Ding,<sup>a</sup> Hao Zhang,<sup>a</sup> Dingyuan Lou,<sup>a</sup> Kaiwen Huang,<sup>a</sup> Yuan Shi,<sup>a</sup> Hongmei Luo,<sup>a</sup> Changjun Zhang<sup>\*a</sup> and Yuanyuan Xie<sup>\*abc</sup>

<sup>a</sup> College of Pharmaceutical Science, Zhejiang University of Technology, Hangzhou, PR China

<sup>b</sup> Collaborative Innovation Center of Yangtze River Delta Region Green Pharmaceutical, Zhejiang University of Technology, Hangzhou, China

<sup>c</sup> Key Laboratory for Green Pharmaceutical Technologies and Related Equipment of Ministry of Education; Key Laboratory of Pharmaceutical Engineering of Zhejiang Province

## SUPPORTING INFORMATION

### Table of contents

|                                                              |            |
|--------------------------------------------------------------|------------|
| <b>1.Experimental Section.....</b>                           | <b>S3</b>  |
| <b>2.Optimization of reaction conditions.....</b>            | <b>S4</b>  |
| <b>3. HRMS for O<sup>18</sup> labeling experiments .....</b> | <b>S6</b>  |
| <b>4.Data of compounds .....</b>                             | <b>S7</b>  |
| <b>5.Copies of all NMR spectra .....</b>                     | <b>S14</b> |
| <b>6. The Computational Calculations .....</b>               | <b>S48</b> |

## 1. Experimental Section

All reagents and solvents were used from commercial sources unless otherwise stated. All raw materials are obtained from commercial sources. All experiments were conducted in the air. All the reactions were monitored by thin-layer chromatography (TLC). TLC was performed on pre-coated silica gel plates (Qingdao Haiyang Chemical Co., Ltd, China). Column chromatography was performed on silica gel (240-400 mesh) with petroleum ether and ethyl acetate as eluent.  $^1\text{H}$  and  $^{13}\text{C}$  NMR (400 and 100 MHz) spectra were recorded on a Bruker Avance 400 MHz using  $\text{CDCl}_3$  and  $\text{DMSO}-d_6$  as solvent with tetramethylsilane as the internal standard. Melting points are determined using an WRS-1B apparatus and are uncorrected. High resolution mass spectra were obtained with the Q-TOF-Premier mass spectrometer. Reactions were monitored by TLC and visualized with ultraviolet light.

### General Procedure (4a as an example)

2-Aminoacetophenone (40.5 mg, 0.3 mmol), *p*-Tolyl isocyanate (43.9 mg, 0.33 mmol), Togni II reagent (114 mg, 0.36 mmol) and  $\text{Bu}_4\text{NBF}_4$  (237 mg, 0.3 mmol) were added to a solution of THF/ $\text{H}_2\text{O}$  (5 mL/1 mL), the reaction mixture was proceeded under a constant current of 3 mA in an undivided cell equipped with a graphite felt anode and a Ni plate cathode at 50 °C for 3 h. The reaction was monitored by TLC. Once the reaction was completed, the reaction mixture was treated with  $\text{H}_2\text{O}$  (15.0 mL) and DCM (8.0 mL). The organic and aqueous layers were then separated, and the aqueous layer was extracted with DCM (3 x 8 mL). The combined organic extracts were dried ( $\text{Na}_2\text{SO}_4$ ), then the solvent was removed under reduced pressure and the remaining residue was purified by column chromatography. Compound **4aa** (234 mg, 71% yield) was obtained as a white solid.

### Photocatalytic setup

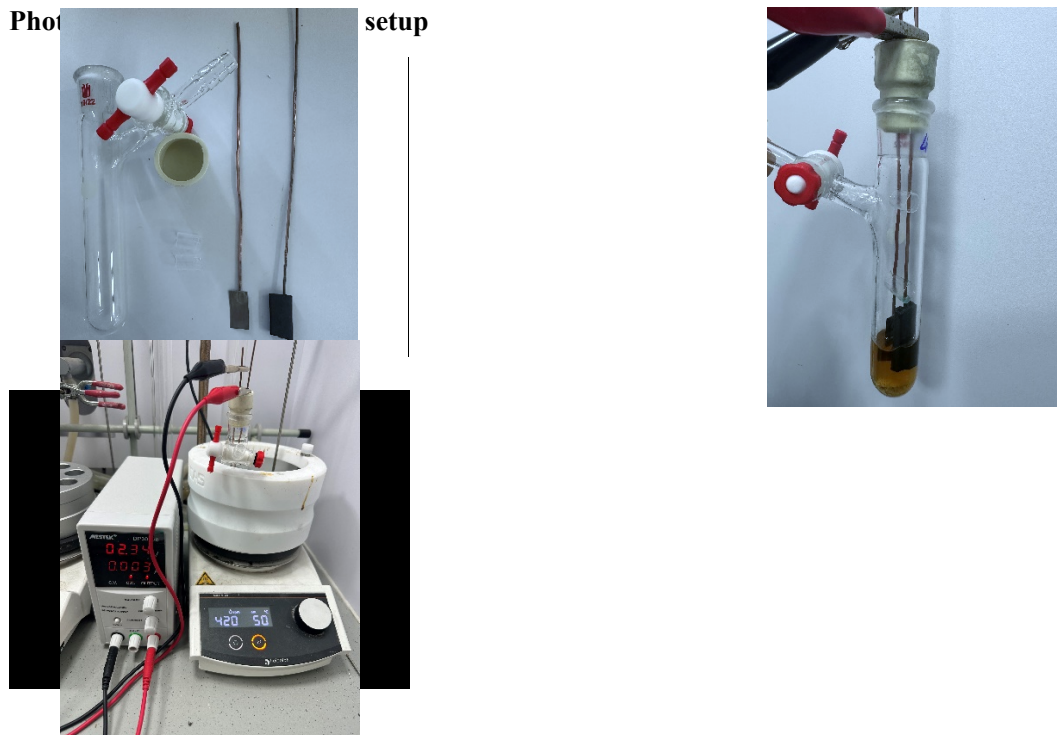

### Cyclic voltammetry studies

The cyclic voltammograms experiments were conducted in a Schlenk tube that contained the

substance dissolved in a 0.1 M solution of tetrabutylammonium tetrafluoroborate in acetonitrile. A glassy carbon electrode working electrode, a platinum wire counter electrode and an Ag/Ag<sup>+</sup> reference electrode were used. The reference electrode was stored in silver nitrate solution for activation before use. The relevant parameters were controlled by an electrochemical workstation CHI600E.

## 2.Optimization of reaction conditions.

2-Aminoacetophenone (**1a**, 40.5 mg, 0.3 mmol), *p*-Tolyl isocyanate (**2a**, 43.9 mg, 0.33 mmol), trifluoromethylation reagent (0.36 mmol), electrolyte and additive dissolved in the solvent were added to an undivided cell equipped with electrode. The samples were reacted with the respective current for the mentioned time. The reaction was monitored by TLC. Once the reaction was completed, the reaction mixture was treated with H<sub>2</sub>O (15.0 mL) and DCM (8.0 mL). The organic and aqueous layers were then separated, and the aqueous layer was extracted with DCM (3 x 8 mL). The combined organic extracts were dried (Na<sub>2</sub>SO<sub>4</sub>), then the solvent was removed under reduced pressure and the remaining residue was purified by column chromatography. The yield of **4a** was the isolated yield.

**Table 1.** Optimization of reaction conditions<sup>a</sup>

| Entry | "CF <sub>3</sub> " source          | A/C   | electrolyte                       | current | solvent                       | additive | Time (h) | temp. (°C) | Yield (%) <sup>a</sup> |
|-------|------------------------------------|-------|-----------------------------------|---------|-------------------------------|----------|----------|------------|------------------------|
| 1     | CF <sub>3</sub> SO <sub>2</sub> Na | C/Pt  | Bu <sub>4</sub> NPF <sub>6</sub>  | 5 mA    | MeCN/H <sub>2</sub> O(1:1)    | -        | 3.5      | 50         | <5                     |
| 2     | Togni                              | C/Pt  | Bu <sub>4</sub> NPF <sub>6</sub>  | 5 mA    | MeCN/H <sub>2</sub> O(1:1)    | -        | 3.5      | 50         | 13                     |
| 3     | TMSCF <sub>3</sub>                 | C/Pt  | Bu <sub>4</sub> NPF <sub>6</sub>  | 5 mA    | MeCN/H <sub>2</sub> O(1:1)    | -        | 3.5      | 50         | N.D.                   |
| 4     | Togni                              | C/Ni  | Bu <sub>4</sub> NPF <sub>6</sub>  | 5 mA    | MeCN/H <sub>2</sub> O(1:1)    | -        | 3.5      | 50         | 32                     |
| 5     | Togni                              | C/C   | Bu <sub>4</sub> NPF <sub>6</sub>  | 5 mA    | MeCN/H <sub>2</sub> O(1:1)    | -        | 3.5      | 50         | <5                     |
| 6     | Togni                              | Pt/Pt | Bu <sub>4</sub> NPF <sub>6</sub>  | 5 mA    | MeCN/H <sub>2</sub> O(1:1)    | -        | 3.5      | 50         | <5                     |
| 7     | Togni                              | C/Ni  | Bu <sub>4</sub> NPF <sub>6</sub>  | 5 mA    | Dioxane/H <sub>2</sub> O(1:1) | -        | 3.5      | 50         | N.D.                   |
| 8     | Togni                              | C/Ni  | Bu <sub>4</sub> NPF <sub>6</sub>  | 5 mA    | THF/H <sub>2</sub> O(1:1)     | -        | 3.5      | 50         | 45                     |
| 9     | Togni                              | C/Ni  | Bu <sub>4</sub> NPF <sub>6</sub>  | 5 mA    | Acetone/H <sub>2</sub> O(1:1) | -        | 3.5      | 50         | 25                     |
| 10    | Togni                              | C/Ni  | Bu <sub>4</sub> NPF <sub>6</sub>  | 5 mA    | EtOH/H <sub>2</sub> O(1:1)    | -        | 3.5      | 50         | <10                    |
| 11    | Togni                              | C/Ni  | Bu <sub>4</sub> NPF <sub>6</sub>  | 5 mA    | DMF/H <sub>2</sub> O(1:1)     | -        | 3.5      | 50         | <10                    |
| 12    | Togni                              | C/Ni  | Bu <sub>4</sub> NPF <sub>6</sub>  | 5 mA    | MeCN                          | -        | 3.5      | 50         | N.D.                   |
| 13    | Togni                              | C/Ni  | Bu <sub>4</sub> NBF <sub>4</sub>  | 5 mA    | THF/H <sub>2</sub> O(1:1)     | -        | 3.5      | 50         | 67                     |
| 14    | Togni                              | C/Ni  | TBAB                              | 5 mA    | THF/H <sub>2</sub> O(1:1)     | -        | 3.5      | 50         | 36                     |
| 15    | Togni                              | C/Ni  | LiClO <sub>4</sub>                | 5 mA    | THF/H <sub>2</sub> O(1:1)     | -        | 3.5      | 50         | 57                     |
| 16    | Togni                              | C/Ni  | Et <sub>4</sub> NClO <sub>4</sub> | 5 mA    | THF/H <sub>2</sub> O(1:1)     | -        | 3.5      | 50         | 64                     |
| 17    | Togni                              | C/Ni  | Bu <sub>4</sub> NBF <sub>4</sub>  | 3 mA    | THF/H <sub>2</sub> O(1:1)     | -        | 3.5      | 50         | 69                     |
| 18    | Togni                              | C/Ni  | Bu <sub>4</sub> NBF <sub>4</sub>  | 7 mA    | THF/H <sub>2</sub> O(1:1)     | -        | 3.5      | 50         | 62                     |

|    |       |      |                                            |       |                           |      |     |    |                 |
|----|-------|------|--------------------------------------------|-------|---------------------------|------|-----|----|-----------------|
| 19 | Togni | C/Ni | Bu <sub>4</sub> NBF <sub>4</sub>           | 10 mA | THF/H <sub>2</sub> O(1:1) | -    | 3.5 | 50 | 58              |
| 20 | Togni | C/Ni | Bu <sub>4</sub> NBF <sub>4</sub>           | 15 mA | THF/H <sub>2</sub> O(1:1) | -    | 3.5 | 50 | 43              |
| 21 | Togni | C/Ni | Bu <sub>4</sub> NBF <sub>4</sub>           | 5 mA  | THF/H <sub>2</sub> O(1:1) | -    | 3.5 | 30 | 64              |
| 22 | Togni | C/Ni | Bu <sub>4</sub> NBF <sub>4</sub>           | 5 mA  | THF/H <sub>2</sub> O(1:1) | -    | 3.5 | 70 | 67              |
| 23 | Togni | C/Ni | Bu <sub>4</sub> NBF <sub>4</sub>           | 3 mA  | THF/H <sub>2</sub> O(1:1) | -    | 1.5 | 50 | 43              |
| 24 | Togni | C/Ni | Bu <sub>4</sub> NBF <sub>4</sub>           | 3 mA  | THF/H <sub>2</sub> O(1:1) | -    | 2.5 | 50 | 62              |
| 25 | Togni | C/Ni | Bu <sub>4</sub> NBF <sub>4</sub>           | 3 mA  | THF/H <sub>2</sub> O(1:1) | -    | 3.5 | 50 | 69 <sup>b</sup> |
| 26 | Togni | C/Ni | Bu <sub>4</sub> NBF <sub>4</sub>           | 3 mA  | THF/H <sub>2</sub> O(1:1) | -    | 4.5 | 50 | 46              |
| 27 | Togni | C/Ni | Bu <sub>4</sub> NBF <sub>4</sub>           | 3 mA  | THF/H <sub>2</sub> O(1:1) | NaOH | 3.5 | 50 | Trace           |
| 28 | Togni | C/Ni | Bu <sub>4</sub> NBF <sub>4</sub>           | 5 mA  | THF/H <sub>2</sub> O(2:1) | -    | 3.5 | 70 | 69              |
| 29 | Togni | C/Ni | Bu <sub>4</sub> NBF <sub>4</sub> (0.1 eq.) | 5 mA  | THF/H <sub>2</sub> O(5:1) | -    | 3.5 | 70 | 32              |
| 30 | Togni | C/Ni | Bu <sub>4</sub> NBF <sub>4</sub> (0.5 eq.) | 5 mA  | THF/H <sub>2</sub> O(5:1) | -    | 3.5 | 70 | 44              |
| 31 | Togni | C/Ni | Bu <sub>4</sub> NBF <sub>4</sub> (1.5 eq.) | 5 mA  | THF/H <sub>2</sub> O(5:1) | -    | 3.5 | 70 | 68              |
| 32 | Togni | C/Ni | Bu <sub>4</sub> NBF <sub>4</sub> (2 eq.)   | 5 mA  | THF/H <sub>2</sub> O(5:1) | -    | 3.5 | 70 | 71              |
| 33 | Togni | C/Ni | -                                          | 5 mA  | THF/H <sub>2</sub> O(5:1) | -    | 3.5 | 70 | <5              |

Reaction conditions: **1a** (0.3 mmol), **2a** (0.33 mmol), **3a** (0.36 mmol), electrolyte (0.6 mmol) and solvent (6 mL) in an undivided cell at the indicated reaction conditions.

<sup>a</sup>Isolated yield <sup>b</sup>N<sub>2</sub> atmosphere

### 3. HRMS for O<sup>18</sup> labeling experiments

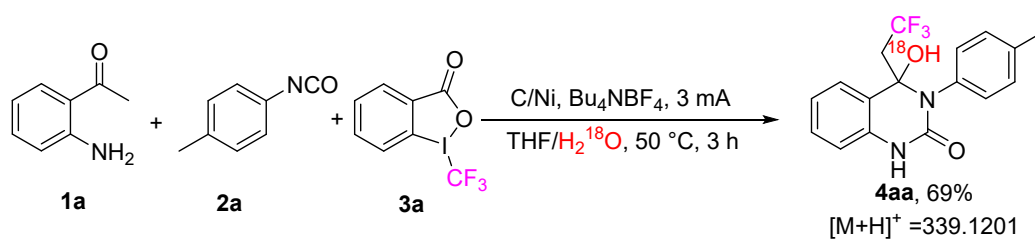

Cpd. 1: C<sub>17</sub> H<sub>15</sub> F<sub>3</sub> N<sub>2</sub> O [18O]

| Name                              | Formula                                                               | Mass        | Diff (Tgt, ppm) | ID Source  | Score      | Algorithm |
|-----------------------------------|-----------------------------------------------------------------------|-------------|-----------------|------------|------------|-----------|
|                                   | C <sub>17</sub> H <sub>15</sub> F <sub>3</sub> N <sub>2</sub> O [18O] | 338.1132    | 1.11            | FBF        | 99.66      | FBF       |
| Species                           | m/z                                                                   | Score (Tgt) | Diff (abs. ppm) | Diff (ppm) | Diff (mDa) |           |
| (M+H) <sup>+</sup>                | 339.1203                                                              | 99.66       | 1.11            | 1.11       | 0.4        |           |
| (M+NH <sub>4</sub> ) <sup>+</sup> | 356.1413                                                              |             |                 |            |            |           |
| (M+Na) <sup>+</sup>               | 361.1024                                                              |             |                 |            |            |           |
|                                   | 362.1055                                                              |             |                 |            |            |           |

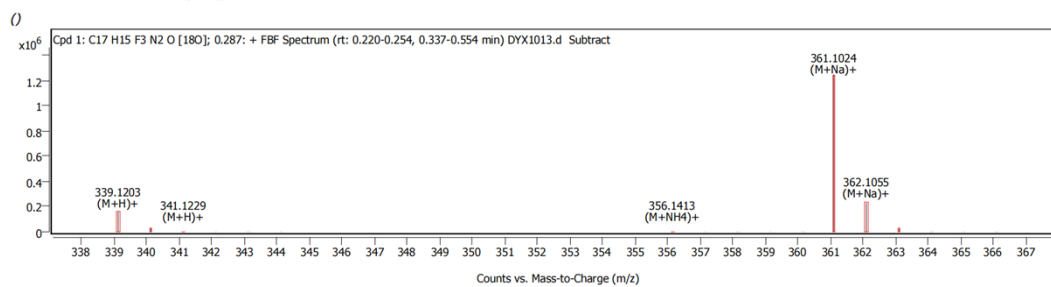

Fig. S1. HRMS for O<sup>18</sup> labeling experiments.

#### 4.Data of compounds

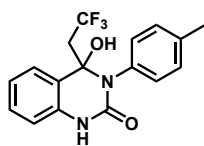

**4-hydroxy-3-(*p*-tolyl)-4-(2,2,2-trifluoroethyl)-3,4-dihydroquinazolin-2(1H)-one (4aa):** White solid; mp 211.7-218.3 °C; <sup>1</sup>H NMR (400 MHz, CDCl<sub>3</sub>) δ 11.00 (s, 1H), 8.66 (d, *J* = 8.6 Hz, 1H), 7.70 (d, *J* = 8.1 Hz, 1H), 7.58 (t, *J* = 8.0 Hz, 1H), 7.31 (d, *J* = 8.0 Hz, 2H), 7.15 (d, *J* = 7.9 Hz, 2H), 7.05 (t, *J* = 7.9 Hz, 1H), 6.74 (s, 1H), 3.84 (q, *J* = 9.8 Hz, 2H), 2.33 (s, 3H). <sup>13</sup>C NMR (100 MHz, CDCl<sub>3</sub>) δ 193.89, 152.65, 143.38, 138.96, 136.28, 135.08, 131.48(q, *J* = 285 Hz), 130.64, 129.69, 121.09, 120.93, 120.60, 114.41, 43.02(q, *J* = 28 Hz), 20.86. <sup>19</sup>F NMR (376 MHz, CDCl<sub>3</sub>) δ -62.05. HRMS (ESI): calcd. for C<sub>17</sub>H<sub>16</sub>F<sub>3</sub>N<sub>2</sub>O<sub>2</sub> [M+H]<sup>+</sup> 337.1158; found 337.1155.

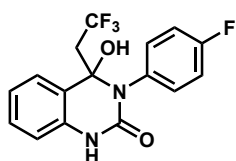

**3-(4-fluorophenyl)-4-hydroxy-4-(2,2,2-trifluoroethyl)-3,4-dihydroquinazolin-2(1H)-one (4ab):** White solid; mp 225.6-232.0 °C; <sup>1</sup>H NMR (400 MHz, DMSO-*d*<sub>6</sub>) δ 10.58 (s, 1H), 9.94 (s, 1H), 8.46 – 8.40 (m, 1H), 8.01 – 7.98 (m, 1H), 7.65 – 7.59 (m, 1H), 7.56 – 7.50 (m, 2H), 7.17 – 7.09 (m, 3H), 4.49 (q, *J* = 10.7 Hz, 2H). <sup>13</sup>C NMR (100 MHz, CDCl<sub>3</sub>) δ 195.22, 158.02 (d, *J* = 238 Hz), 152.76, 142.09, 136.37 (d, *J* = 3.0 Hz), 135.50, 132.12, 129.73, 125.51 (q, *J* = 275 Hz), 121.47, 120.83 (d, *J* = 8.0 Hz), 120.63, 115.74 (d, *J* = 22 Hz), 43.06 (q, *J* = 27 Hz). <sup>19</sup>F NMR (376 MHz, DMSO-*d*<sub>6</sub>) δ -60.88, -120.91. HRMS (ESI): calcd. for C<sub>16</sub>H<sub>13</sub>F<sub>4</sub>N<sub>2</sub>O<sub>2</sub> [M+H]<sup>+</sup> 341.0908; found 341.0905.

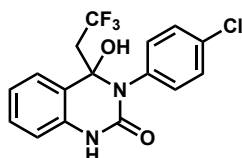

**3-(4-chlorophenyl)-4-hydroxy-4-(2,2,2-trifluoroethyl)-3,4-dihydroquinazolin-2(1H)-one (4ac):** White solid; mp 196.2-198.1 °C; <sup>1</sup>H NMR (400 MHz, DMSO-*d*<sub>6</sub>) δ 10.61 (s, 1H), 10.05 (s, 1H), 8.41 (dd, *J* = 8.6, 1.2 Hz, 1H), 8.01 (dd, *J* = 8.1, 1.6 Hz, 1H), 7.63 (ddd, *J* = 8.7, 7.3, 1.6 Hz, 1H), 7.59 – 7.53 (m, 2H), 7.39 – 7.31 (m, 2H), 7.14 (ddd, *J* = 8.2, 7.2, 1.2 Hz, 1H), 4.50 (q, *J* = 10.7 Hz, 2H). <sup>13</sup>C NMR (100 MHz, CDCl<sub>3</sub>) δ 193.41, 152.62, 141.88, 139.08, 135.50, 132.12, 129.08, 126.25, 125.51 (q, *J* = 275 Hz), 121.63, 120.70, 120.57, 115.65, 43.07 (q, *J* = 25 Hz). <sup>19</sup>F NMR (376 MHz, DMSO-*d*<sub>6</sub>) δ -60.87. HRMS (ESI): calcd. for C<sub>16</sub>H<sub>13</sub>ClF<sub>3</sub>N<sub>2</sub>O<sub>2</sub> [M+H]<sup>+</sup> 357.0612; found 357.0617.

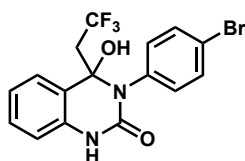

**3-(4-bromophenyl)-4-hydroxy-4-(2,2,2-trifluoroethyl)-3,4-dihydroquinazolin-2(1H)-one (4ad):** White solid; mp 215.8-220.2 °C; <sup>1</sup>H NMR (400 MHz, DMSO-*d*<sub>6</sub>) δ 10.60 (s, 1H), 10.05 (s, 1H), 8.41 (d, *J* = 8.6 Hz, 1H), 8.00 (d, *J* = 8.1 Hz, 1H), 7.62 (t, *J* = 8.0 Hz, 1H), 7.53 – 7.43 (m, 4H), 7.13 (t, *J* = 7.7



Hz, 1H), 4.49 (q,  $J = 10.6$  Hz, 2H).  $^{13}\text{C}$  NMR (100 MHz,  $\text{CDCl}_3$ )  $\delta$  195.21, 152.59, 141.86, 139.51, 135.50, 132.11, 131.97, 128.29 (q,  $J = 287$  Hz), 121.64, 121.59, 120.98, 120.71, 114.18, 43.07 (q,  $J = 26$  Hz).  $^{19}\text{F}$  NMR (376 MHz,  $\text{DMSO}-d_6$ )  $\delta$  -60.89. HRMS (ESI): calcd. for  $\text{C}_{16}\text{H}_{13}\text{BrF}_3\text{N}_2\text{O}_2$   $[\text{M}+\text{H}]^+$  401.0107; found 401.0110.

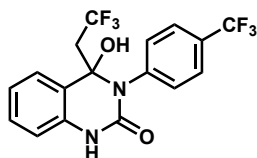

**4-hydroxy-4-(2,2,2-trifluoroethyl)-3-(4-(trifluoromethyl)phenyl)-3,4-dihydroquinazolin-2(1H)-one (4ae):** White solid; mp 212.9-222.4 °C;  $^1\text{H}$  NMR (400 MHz,  $\text{DMSO}-d_6$ )  $\delta$  10.66 (s, 1H), 10.32 (s, 1H), 8.43 (d,  $J = 8.6$  Hz, 1H), 8.05 – 7.99 (m, 1H), 7.73 (t,  $J = 9.0$  Hz, 2H), 7.66 (d,  $J = 8.6$  Hz, 2H), 7.51 – 7.21 (m, 1H), 7.19 – 7.07 (m, 1H), 4.51 (q,  $J = 10.7$  Hz, 2H).  $^{13}\text{C}$  NMR (100 MHz,  $\text{CDCl}_3$ )  $\delta$  195.27, 152.59, 142.73 (q,  $J = 226$  Hz), 135.51, 132.13, 126.86, 126.50 (q,  $J = 3$  Hz), 125.23 (q,  $J = 222$  Hz), 123.65, 122.62 (q,  $J = 31$  Hz), 121.89, 121.80, 120.82, 43.08 (q,  $J = 27$  Hz).  $^{19}\text{F}$  NMR (376 MHz,  $\text{DMSO}-d_6$ )  $\delta$  -60.17, -60.91. HRMS (ESI): calcd. for  $\text{C}_{17}\text{H}_{13}\text{F}_6\text{N}_2\text{O}_2$   $[\text{M}+\text{H}]^+$  391.0876; found 391.0870.

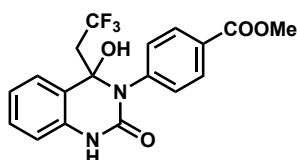

**methyl 4-(4-hydroxy-2-oxo-4-(2,2,2-trifluoroethyl)-1,4-dihydroquinazolin-3(2H)-yl)benzoate (4af):** White solid; mp 191.2-192.0 °C;  $^1\text{H}$  NMR (400 MHz,  $\text{DMSO}-d_6$ )  $\delta$  10.67 (s, 1H), 10.34 (s, 1H), 8.42 (dd,  $J = 8.6, 1.2$  Hz, 1H), 8.02 (dd,  $J = 8.2, 1.6$  Hz, 1H), 7.95 – 7.86 (m, 2H), 7.72 – 7.59 (m, 3H), 7.20 – 7.13 (m, 1H), 4.52 (q,  $J = 10.7$  Hz, 2H), 3.82 (s, 3H).  $^{13}\text{C}$  NMR (100 MHz,  $\text{CDCl}_3$ )  $\delta$  195.26, 166.38, 152.49, 144.78, 141.57, 135.50, 132.13, 130.81, 125.51 (q,  $J = 274$  Hz), 123.27, 121.89, 121.78, 120.85, 118.21, 52.28, 43.08 (q,  $J = 26$  Hz).  $^{19}\text{F}$  NMR (376 MHz,  $\text{DMSO}-d_6$ )  $\delta$  -60.90. HRMS (ESI): calcd. for  $\text{C}_{18}\text{H}_{16}\text{F}_3\text{N}_2\text{O}_4$   $[\text{M}+\text{H}]^+$  381.1057; found 381.1061.

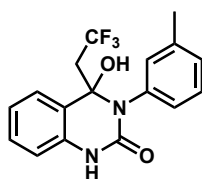

**4-hydroxy-3-(m-tolyl)-4-(2,2,2-trifluoroethyl)-3,4-dihydroquinazolin-2(1H)-one (4ah):** White solid; mp 196.2-198.1 °C;  $^1\text{H}$  NMR (400 MHz,  $\text{DMSO}-d_6$ )  $\delta$  10.53 (s, 1H), 9.84 (s, 1H), 8.43 – 8.36 (m, 1H), 7.99 (dd,  $J = 8.1, 1.7$  Hz, 1H), 7.61 (ddd,  $J = 8.7, 7.2, 1.6$  Hz, 1H), 7.37 (d,  $J = 2.1$  Hz, 1H), 7.30 (d,  $J = 8.1$  Hz, 1H), 7.20 – 7.08 (m, 2H), 6.81 (d,  $J = 7.4$  Hz, 1H), 4.48 (q,  $J = 10.7$  Hz, 2H), 2.28 (s, 3H).  $^{13}\text{C}$  NMR (100 MHz,  $\text{CDCl}_3$ )  $\delta$  195.08, 152.71, 142.06, 139.98, 138.32, 135.40, 132.05, 129.04, 125.52 (q,  $J = 276$  Hz), 123.43, 121.6, 121.44, 120.75, 119.70, 116.32, 43.07 (q,  $J = 28$  Hz), 21.72.  $^{19}\text{F}$  NMR (376 MHz,  $\text{DMSO}-d_6$ )  $\delta$  -60.87. HRMS (ESI): calcd. for  $\text{C}_{17}\text{H}_{16}\text{F}_3\text{N}_2\text{O}_2$   $[\text{M}+\text{H}]^+$  337.1158; found 337.1162.

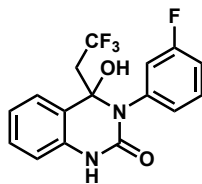

**3-(3-fluorophenyl)-4-hydroxy-4-(2,2,2-trifluoroethyl)-3,4-dihydroquinazolin-2(1H)-one (4ai):**

White solid; mp 187.1-192.0 °C; <sup>1</sup>H NMR (400 MHz, DMSO-*d*<sub>6</sub>) δ 10.61 (s, 1H), 10.13 (s, 1H), 8.48 – 8.36 (m, 1H), 8.03 – 7.95 (m, 1H), 7.72 – 7.59 (m, 1H), 7.57 – 7.44 (m, 1H), 7.36 – 7.27 (m, 1H), 7.25 – 7.20 (m, 1H), 7.17 – 7.10 (m, 1H), 6.84 – 6.76 (m, 1H), 4.50 (q, *J* = 10.6 Hz, 2H). <sup>13</sup>C NMR (100 MHz, CDCl<sub>3</sub>) δ 195.24, 162.78 (d, *J* = 240 Hz), 152.61, 141.96 (d, *J* = 11 Hz), 141.76, 135.50, 132.11, 130.76 (d, *J* = 10 Hz), 125.50 (q, *J* = 275 Hz), 121.73, 121.68, 120.77, 114.75 (d, *J* = 3 Hz), 109.02 (d, *J* = 21 Hz), 105.73 (d, *J* = 26 Hz), 43.08 (q, *J* = 27 Hz). <sup>19</sup>F NMR (376 MHz, DMSO-*d*<sub>6</sub>) δ -60.90, -112.18. HRMS (ESI): calcd. for C<sub>16</sub>H<sub>13</sub>F<sub>4</sub>N<sub>2</sub>O<sub>2</sub> [M+H]<sup>+</sup> 341.0908; found 341.0912.

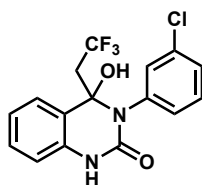

**3-(3-chlorophenyl)-4-hydroxy-4-(2,2,2-trifluoroethyl)-3,4-dihydroquinazolin-2(1H)-one (4aj):**

White solid; mp 224.3-227.4 °C; <sup>1</sup>H NMR (400 MHz, DMSO-*d*<sub>6</sub>) δ 10.61 (s, 1H), 10.13 (s, 1H), 8.40 (d, *J* = 8.5 Hz, 1H), 8.00 (dd, *J* = 8.2, 1.5 Hz, 1H), 7.75 (t, *J* = 2.0 Hz, 1H), 7.63 (ddd, *J* = 8.6, 7.2, 1.5 Hz, 1H), 7.47 – 7.29 (m, 2H), 7.16 – 7.10 (m, 1H), 7.04 (dt, *J* = 7.8, 1.5 Hz, 1H), 4.50 (q, *J* = 10.7 Hz, 2H). <sup>13</sup>C NMR (100 MHz, CDCl<sub>3</sub>) δ 195.25, 152.61, 141.69, 141.65, 141.53, 135.49, 133.60, 132.10, 130.86, 125.50 (q, *J* = 275 Hz), 122.31, 121.77, 120.76, 118.42, 117.40, 43.08 (q, *J* = 26 Hz). <sup>19</sup>F NMR (376 MHz, DMSO-*d*<sub>6</sub>) δ -60.89. HRMS (ESI): calcd. for C<sub>16</sub>H<sub>13</sub>ClF<sub>3</sub>N<sub>2</sub>O<sub>2</sub> [M+H]<sup>+</sup> 357.0612; found 357.0615.

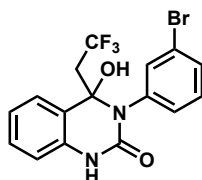

**3-(3-bromophenyl)-4-hydroxy-4-(2,2,2-trifluoroethyl)-3,4-dihydroquinazolin-2(1H)-one (4ak):**

White solid; mp 222.0-225.4 °C; <sup>1</sup>H NMR (400 MHz, DMSO-*d*<sub>6</sub>) δ 10.62 (s, 1H), 10.10 (s, 1H), 8.45 – 8.36 (m, 1H), 8.01 (dd, *J* = 8.1, 1.6 Hz, 1H), 7.94 – 7.84 (m, 1H), 7.67 – 7.58 (m, 1H), 7.41 (dd, *J* = 8.2, 1.9 Hz, 1H), 7.25 (t, *J* = 8.0 Hz, 1H), 7.21 – 7.05 (m, 2H), 4.50 (q, *J* = 10.7 Hz, 2H). <sup>13</sup>C NMR (100 MHz, CDCl<sub>3</sub>) δ 195.28, 152.58, 141.79, 141.74, 135.52, 132.13, 131.17, 125.50 (q, *J* = 275 Hz), 125.21, 122.12, 121.76, 121.66, 121.28, 120.73, 117.78, 43.08 (q, *J* = 26 Hz). <sup>19</sup>F NMR (376 MHz, DMSO-*d*<sub>6</sub>) δ -60.89. HRMS (ESI): calcd. for C<sub>16</sub>H<sub>13</sub>BrF<sub>3</sub>N<sub>2</sub>O<sub>2</sub> [M+H]<sup>+</sup> 401.0107; found 401.0103.

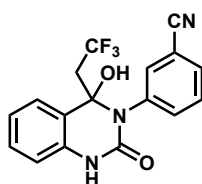

**3-(4-hydroxy-2-oxo-4-(2,2,2-trifluoroethyl)-1,4-dihydroquinazolin-3(2H)-yl)benzonitrile (4al):**

White solid; mp 218.0-218.7 °C; <sup>1</sup>H NMR (400 MHz, DMSO-*d*<sub>6</sub>) δ 10.69 (s, 1H), 10.29 (s, 1H), 8.42 (dd, *J* = 8.6, 1.1 Hz, 1H), 8.05 – 7.98 (m, 2H), 7.73 (dt, *J* = 8.4, 1.6 Hz, 1H), 7.65 (ddd, *J* = 8.7, 7.2, 1.5 Hz, 1H), 7.52 (t, *J* = 7.9 Hz, 1H), 7.46 (dt, *J* = 7.7, 1.5 Hz, 1H), 7.19 – 7.14 (m, 1H), 4.52 (q, *J* = 10.7 Hz, 2H). <sup>13</sup>C NMR (100 MHz, CDCl<sub>3</sub>) δ 195.37, 152.65, 141.59, 141.00, 135.57, 132.16, 130.68, 126.17, 125.50 (q, *J* = 275 Hz), 123.61, 121.90, 121.69, 121.57, 120.72, 119.34, 112.04, 43.08 (q, *J* = 27 Hz). <sup>19</sup>F NMR (376 MHz, DMSO-*d*<sub>6</sub>) δ -60.90. HRMS (ESI): calcd. for C<sub>17</sub>H<sub>13</sub>F<sub>3</sub>N<sub>3</sub>O<sub>2</sub> [M+H]<sup>+</sup> 348.0954; found 348.0959.

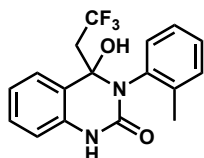

**4-hydroxy-3-(*o*-tolyl)-4-(2,2,2-trifluoroethyl)-3,4-dihydroquinazolin-2(1H)-one (4am):**

White solid; mp 212.7-215.1 °C; <sup>1</sup>H NMR (400 MHz, DMSO-*d*<sub>6</sub>) δ 10.48 (s, 1H), 9.11 (s, 1H), 8.30 (dd, *J* = 8.6, 1.2 Hz, 1H), 7.96 (dd, *J* = 8.3, 1.5 Hz, 1H), 7.58 (ddd, *J* = 8.6, 7.2, 1.6 Hz, 1H), 7.44 (dd, *J* = 8.2, 1.5 Hz, 1H), 7.20 (dd, *J* = 8.0, 1.7 Hz, 1H), 7.17 – 7.08 (m, 2H), 7.04 (td, *J* = 7.4, 1.3 Hz, 1H), 4.44 (q, *J* = 10.7 Hz, 2H), 2.24 (s, 3H). <sup>13</sup>C NMR (100 MHz, CDCl<sub>3</sub>) δ 194.71, 153.43, 141.88, 137.11, 135.16, 131.80, 131.67, 130.78, 125.50 (q, *J* = 275 Hz), 125.04, 124.89, 122.33, 121.48, 121.11, 43.10 (q, *J* = 27 Hz), 17.61. <sup>19</sup>F NMR (376 MHz, DMSO-*d*<sub>6</sub>) δ -60.86. HRMS (ESI): calcd. for C<sub>17</sub>H<sub>16</sub>F<sub>3</sub>N<sub>2</sub>O<sub>2</sub> [M+H]<sup>+</sup> 337.1158; found 337.1166.

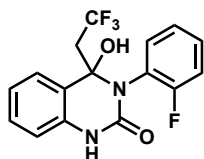

**3-(2-fluorophenyl)-4-hydroxy-4-(2,2,2-trifluoroethyl)-3,4-dihydroquinazolin-2(1H)-one (4an):**

White solid; mp 221.4-226.4 °C; <sup>1</sup>H NMR (400 MHz, DMSO-*d*<sub>6</sub>) δ 10.45 (s, 1H), 9.72 (s, 1H), 8.26 – 8.17 (m, 1H), 7.97 (dd, *J* = 8.1, 1.6 Hz, 1H), 7.94 – 7.81 (m, 1H), 7.68 – 7.56 (m, 1H), 7.29 – 7.19 (m, 1H), 7.18 – 7.11 (m, 2H), 7.11 – 6.98 (m, 1H), 4.45 (q, *J* = 10.7 Hz, 2H). <sup>13</sup>C NMR (100 MHz, CDCl<sub>3</sub>) δ 194.51, 153.87 (d, *J* = 242 Hz), 152.97, 141.00, 135.00, 131.67, 127.28 (d, *J* = 11 Hz), 125.50 (q, *J* = 274 Hz), 124.83 (d, *J* = 4 Hz), 124.41 (d, *J* = 7 Hz), 123.62, 123.12, 122.00, 121.68, 115.81 (d, *J* = 19 Hz), 43.17 (q, *J* = 26 Hz). <sup>19</sup>F NMR (376 MHz, DMSO-*d*<sub>6</sub>) δ -60.90, -126.28. HRMS (ESI): calcd. for C<sub>17</sub>H<sub>16</sub>F<sub>3</sub>N<sub>2</sub>O<sub>2</sub> [M+H]<sup>+</sup> 341.0908; found 341.0905.

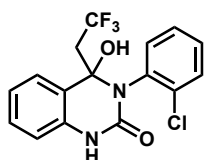

**3-(2-chlorophenyl)-4-hydroxy-4-(2,2,2-trifluoroethyl)-3,4-dihydroquinazolin-2(1H)-one (4ao):**

White solid; mp 220.9-223.8 °C; <sup>1</sup>H NMR (400 MHz, DMSO-*d*<sub>6</sub>) δ 10.46 (s, 1H), 9.43 (s, 1H), 8.17 (dd, *J* = 8.5, 1.2 Hz, 1H), 7.95 (dd, *J* = 8.0, 1.6 Hz, 1H), 7.79 (dt, *J* = 8.2, 1.3 Hz, 1H), 7.60 (ddd, *J* = 8.7, 7.2, 1.6 Hz, 1H), 7.52 – 7.43 (m, 1H), 7.31 (td, *J* = 7.7, 1.5 Hz, 1H), 7.14 (dtd, *J* = 9.6, 7.8, 1.4 Hz, 2H), 4.44 (q, *J* = 10.8 Hz, 2H). <sup>13</sup>C NMR (100 MHz, CDCl<sub>3</sub>) δ 194.39, 153.17, 140.74, 135.99, 134.86, 131.47,

129.91, 129.61, 128.62, 127.86, 125.99, 125.56, 125.48 (q,  $J = 274$ Hz), 123.71, 122.15, 121.86, 43.15 (q,  $J = 26$  Hz).  $^{19}\text{F}$  NMR (376 MHz,  $\text{DMSO-}d_6$ )  $\delta$  -60.89. HRMS (ESI): calcd. for  $\text{C}_{16}\text{H}_{13}\text{ClF}_3\text{N}_2\text{O}_2$   $[\text{M}+\text{H}]^+$  357.0612; found 357.0617.

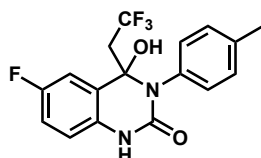

**6-fluoro-4-hydroxy-3-(p-tolyl)-4-(2,2,2-trifluoroethyl)-3,4-dihydroquinazolin-2(1H)-one (4at):**

White solid; mp 217.5-218.1 °C;  $^1\text{H}$  NMR (400 MHz,  $\text{DMSO-}d_6$ )  $\delta$  10.27 (s, 1H), 9.77 (s, 1H), 8.36 (dd,  $J = 9.4, 5.2$  Hz, 1H), 7.85 (dd,  $J = 9.9, 3.0$  Hz, 1H), 7.54 – 7.45 (m, 1H), 7.42 – 7.37 (m, 2H), 7.13 – 7.05 (m, 2H), 4.49 (q,  $J = 10.6$  Hz, 2H), 2.25 (s, 3H).  $^{13}\text{C}$  NMR (150 MHz,  $\text{CDCl}_3$ )  $\delta$  194.17, 162.39, 156.24 (d,  $J = 238$  Hz), 152.81, 138.26, 137.40, 131.59, 129.61, 125.45 (q,  $J = 303$  Hz), 123.17 (d,  $J = 7.5$  Hz), 122.37 (d,  $J = 22.5$  Hz), 119.22, 117.42 (d,  $J = 24$  Hz), 43.24 (q,  $J = 36$  Hz), 20.82.  $^{19}\text{F}$  NMR (376 MHz,  $\text{DMSO-}d_6$ )  $\delta$  -61.02, -121.29. HRMS (ESI): calcd. for  $\text{C}_{17}\text{H}_{15}\text{F}_4\text{N}_2\text{O}_2$   $[\text{M}+\text{H}]^+$  355.1064; found 355.1061.

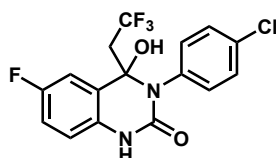

**3-(4-chlorophenyl)-6-fluoro-4-hydroxy-4-(2,2,2-trifluoroethyl)-3,4-dihydroquinazolin-2(1H)-one (4au):**

White solid; mp 206.3-206.7 °C;  $^1\text{H}$  NMR (400 MHz,  $\text{DMSO-}d_6$ )  $\delta$  10.34 (s, 1H), 10.02 (s, 1H), 8.36 (dd,  $J = 9.4, 5.2$  Hz, 1H), 7.87 (dd,  $J = 9.9, 3.0$  Hz, 1H), 7.57 – 7.51 (m, 3H), 7.36 – 7.33 (m, 2H), 4.50 (q,  $J = 10.6$  Hz, 2H).  $^{13}\text{C}$  NMR (150 MHz,  $\text{CDCl}_3$ )  $\delta$  194.32, 156.38 (d,  $J = 238$  Hz), 152.70, 139.01, 137.93 (d,  $J = 2$  Hz), 129.10, 128.79, 126.27, 125.75 (q,  $J = 193$  Hz), 123.16 (d,  $J = 7$  Hz), 122.43 (d,  $J = 23$  Hz), 120.54, 117.53 (d,  $J = 23$  Hz), 43.28 (q,  $J = 17$  Hz).  $^{19}\text{F}$  NMR (376 MHz,  $\text{DMSO-}d_6$ )  $\delta$  -61.03, -120.89. HRMS (ESI): calcd. for  $\text{C}_{16}\text{H}_{12}\text{ClF}_4\text{N}_2\text{O}_2$   $[\text{M}+\text{H}]^+$  375.0518 found 375.0521.

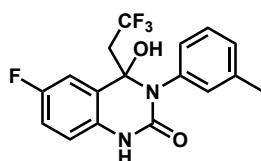

**6-fluoro-4-hydroxy-3-(m-tolyl)-4-(2,2,2-trifluoroethyl)-3,4-dihydroquinazolin-2(1H)-one (4av):**

White solid; mp 214.5-216.1 °C;  $^1\text{H}$  NMR (400 MHz,  $\text{DMSO-}d_6$ )  $\delta$  10.28 (s, 1H), 9.81 (s, 1H), 8.36 (dd,  $J = 9.4, 5.2$  Hz, 1H), 7.85 (dd,  $J = 9.9, 3.0$  Hz, 1H), 7.52 (ddd,  $J = 9.3, 7.8, 3.1$  Hz, 1H), 7.35 (d,  $J = 2.0$  Hz, 1H), 7.30 – 7.27 (m, 1H), 7.16 (d,  $J = 7.8$  Hz, 1H), 6.82 (d,  $J = 7.4$  Hz, 1H), 4.49 (q,  $J = 10.7$  Hz, 2H), 2.28 (s, 3H).  $^{13}\text{C}$  NMR (150 MHz,  $\text{CDCl}_3$ )  $\delta$  194.16, 156.28 (d,  $J = 238$  Hz), 152.79, 139.92, 138.35, 138.14, 129.05, 125.36 (q,  $J = 275$  Hz), 123.46, 123.21 (d,  $J = 7.5$  Hz), 122.35 (d,  $J = 21$  Hz), 119.69, 117.43 (d,  $J = 24$  Hz), 116.31, 43.28 (q,  $J = 27$  Hz), 20.77.  $^{19}\text{F}$  NMR (376 MHz,  $\text{DMSO-}d_6$ )  $\delta$  -61.02, -121.18. HRMS (ESI): calcd. for  $\text{C}_{17}\text{H}_{15}\text{F}_4\text{N}_2\text{O}_2$   $[\text{M}+\text{H}]^+$  355.1064 found 355.1069.

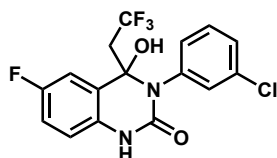

**3-(3-chlorophenyl)-6-fluoro-4-(2,2,2-trifluoroethyl)-3,4-dihydroquinazolin-2(1H)-one (4aw):** White solid; mp 204.2-204.9 °C;  $^1\text{H}$  NMR (400 MHz,  $\text{DMSO-}d_6$ )  $\delta$  10.35 (s, 1H), 10.09 (s, 1H), 8.36 (dd,  $J = 9.4, 5.2$  Hz, 1H), 7.87 (dd,  $J = 9.9, 3.0$  Hz, 1H), 7.74 (t,  $J = 2.0$  Hz, 1H), 7.58 – 7.50 (m, 1H), 7.38 – 7.28 (m, 2H), 7.05 (dt,  $J = 7.4, 1.8$  Hz, 1H), 4.50 (q,  $J = 10.6$  Hz, 2H).  $^{13}\text{C}$  NMR (100 MHz,  $\text{CDCl}_3$ )  $\delta$  194.35, 156.46 (d,  $J = 238$  Hz), 152.68, 141.58, 137.76 (d,  $J = 2$  Hz), 133.61, 130.88, 125.34 (q,  $J = 275$  Hz), 123.22 (d,  $J = 8$  Hz), 122.53, 122.32, 118.39, 117.55 (d,  $J = 24$  Hz), 117.37, 43.29 (q,  $J = 27$  Hz).  $^{19}\text{F}$  NMR (376 MHz,  $\text{DMSO-}d_6$ )  $\delta$  -61.04, -120.72. HRMS (ESI): calcd. for  $\text{C}_{16}\text{H}_{12}\text{ClF}_4\text{N}_2\text{O}_2$   $[\text{M}+\text{H}]^+$  375.0518 found 375.0515.

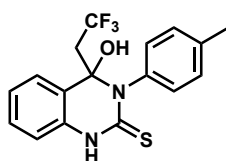

**4-hydroxy-3-(p-tolyl)-4-(2,2,2-trifluoroethyl)-3,4-dihydroquinazoline-2(1H)-thione (6aa):** White solid; mp 211.3-214.1 °C;  $^1\text{H}$  NMR (400 MHz,  $\text{DMSO-}d_6$ )  $\delta$  10.52 (s, 1H), 9.78 (s, 1H), 8.41 (dd,  $J = 8.6, 1.2$  Hz, 1H), 7.99 (dd,  $J = 8.2, 1.6$  Hz, 1H), 7.61 (ddd,  $J = 8.6, 7.1, 1.6$  Hz, 1H), 7.46 – 7.37 (m, 2H), 7.15 – 7.06 (m, 3H), 4.47 (q,  $J = 10.7$  Hz, 2H), 2.25 (s, 3H).  $^{13}\text{C}$  NMR (100 MHz,  $\text{CDCl}_3$ )  $\delta$  195.00, 152.75, 142.18, 137.45, 135.39, 132.03, 131.59, 129.58, 125.56 (q,  $J = 275$  Hz), 121.60, 121.35, 120.73, 119.30, 43.07 (q,  $J = 26$  Hz), 20.82.  $^{19}\text{F}$  NMR (376 MHz,  $\text{DMSO-}d_6$ )  $\delta$  -60.86. HRMS (ESI): calcd. for  $\text{C}_{17}\text{H}_{16}\text{F}_3\text{N}_2\text{OS}$   $[\text{M}+\text{H}]^+$  353.0930; found 353.0935.

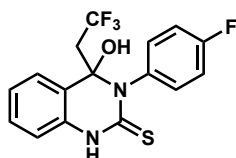

**3-(4-fluorophenyl)-4-(2,2,2-trifluoroethyl)-3,4-dihydroquinazoline-2(1H)-thione (6ab):** White solid; mp 219.1-222.2 °C;  $^1\text{H}$  NMR (400 MHz,  $\text{DMSO-}d_6$ )  $\delta$  10.60 (s, 1H), 9.95 (s, 1H), 8.45 – 8.39 (m, 1H), 8.02 – 7.94 (m, 2H), 7.77 – 7.70 (m, 1H), 7.65 – 7.60 (m, 1H), 7.53 – 7.50 (m, 1H), 7.28 – 7.18 (m, 1H), 7.11 (dd,  $J = 6.0, 1.9$  Hz, 1H), 4.50 (q,  $J = 10.7$  Hz, 2H).  $^{13}\text{C}$  NMR (100 MHz,  $\text{CDCl}_3$ )  $\delta$  195.20, 158.03 (d,  $J = 237$  Hz), 152.76, 142.11, 136.37 (d,  $J = 3$  Hz), 135.50, 129.73, 129.03, 125.51 (q,  $J = 274$  Hz), 121.46, 120.83 (d,  $J = 8$  Hz), 120.63, 115.74 (d,  $J = 22$  Hz), 43.06 (q,  $J = 25$  Hz).  $^{19}\text{F}$  NMR (376 MHz,  $\text{DMSO-}d_6$ )  $\delta$  -60.87, -120.89. HRMS (ESI): calcd. for  $\text{C}_{16}\text{H}_{13}\text{F}_4\text{N}_2\text{OS}$   $[\text{M}+\text{H}]^+$  357.0679; found 357.0677.

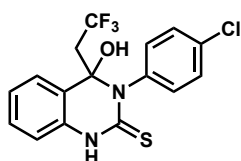

**3-(4-chlorophenyl)-4-(2,2,2-trifluoroethyl)-3,4-dihydroquinazoline-2(1H)-thione (6ac):** White solid; mp 212.6-215.0 °C;  $^1\text{H}$  NMR (400 MHz,  $\text{DMSO-}d_6$ )  $\delta$  10.61 (s, 1H), 10.05 (s, 1H), 8.42

(dd,  $J = 8.6, 1.8$  Hz, 1H), 8.02 (d,  $J = 1.5$  Hz, 1H), 7.66 – 7.60 (m, 1H), 7.58 – 7.52 (m, 2H), 7.38 – 7.33 (m, 2H), 7.16 – 7.10 (m, 1H), 4.50 (q,  $J = 10.7$  Hz, 2H).  $^{13}\text{C}$  NMR (100 MHz,  $\text{CDCl}_3$ )  $\delta$  195.24, 152.62, 141.88, 139.08, 137.36, 135.51, 132.12, 129.73, 129.09, 125.51 (q,  $J = 274$  Hz), 121.63, 121.04, 120.58, 43.07 (q,  $J = 27$  Hz).  $^{19}\text{F}$  NMR (376 MHz,  $\text{DMSO}-d_6$ )  $\delta$  -60.87. HRMS (ESI): calcd. for  $\text{C}_{16}\text{H}_{13}\text{ClF}_3\text{N}_2\text{OS}$   $[\text{M}+\text{H}]^+$  373.0384; found 373.0387.

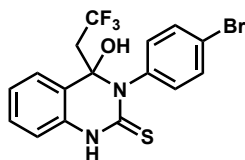

**3-(4-bromophenyl)-4-hydroxy-4-(2,2,2-trifluoroethyl)-3,4-dihydroquinazoline-2(1H)-thione (6ad):**

White solid; mp 215.4-220.2 °C;  $^1\text{H}$  NMR (400 MHz,  $\text{DMSO}-d_6$ )  $\delta$  10.60 (s, 1H), 10.04 (s, 1H), 8.41 (dd,  $J = 8.5, 1.3$  Hz, 1H), 7.97 – 7.94 (m, 1H), 7.67 – 7.58 (m, 2H), 7.48 (d,  $J = 2.1$  Hz, 3H), 7.17 – 7.09 (m, 1H), 4.49 (q,  $J = 10.7$  Hz, 2H).  $^{13}\text{C}$  NMR (100 MHz,  $\text{CDCl}_3$ )  $\delta$  195.24, 152.59, 141.87, 139.51, 135.51, 132.12, 129.73, 129.04, 125.50 (q,  $J = 273$  Hz), 121.64, 120.98, 120.71, 114.19, 43.09 (q,  $J = 27$  Hz).  $^{19}\text{F}$  NMR (376 MHz,  $\text{DMSO}-d_6$ )  $\delta$  -60.88. HRMS (ESI): calcd. for  $\text{C}_{16}\text{H}_{13}\text{BrF}_3\text{N}_2\text{OS}$   $[\text{M}+\text{H}]^+$  416.9879; found 416.9875.

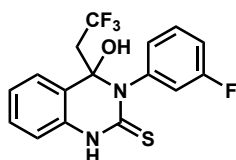

**3-(3-fluorophenyl)-4-hydroxy-4-(2,2,2-trifluoroethyl)-3,4-dihydroquinazoline-2(1H)-thione (6ae):**

White solid; mp 189.9-192.9 °C;  $^1\text{H}$  NMR (400 MHz,  $\text{DMSO}-d_6$ )  $\delta$  10.62 (s, 1H), 10.14 (s, 1H), 8.44 – 8.38 (m, 1H), 7.97 – 7.93 (m, 1H), 7.67 – 7.59 (m, 2H), 7.56 – 7.52 (m, 1H), 7.36 – 7.28 (m, 1H), 7.18 – 7.11 (m, 1H), 6.85 – 6.77 (m, 1H), 4.50 (q,  $J = 10.7$  Hz, 2H).  $^{13}\text{C}$  NMR (100 MHz,  $\text{CDCl}_3$ )  $\delta$  195.25, 162.77 (d,  $J = 239$  Hz), 152.61, 141.95 (d,  $J = 12$  Hz), 141.73, 135.51, 133.34, 132.10, 131.20, 130.77 (d,  $J = 9$  Hz), 125.50 (q,  $J = 275$  Hz), 121.76, 120.78, 114.76 (d,  $J = 2$  Hz), 109.04 (d,  $J = 21$  Hz), 105.73 (d,  $J = 23$  Hz), 43.08 (q,  $J = 26$  Hz).  $^{19}\text{F}$  NMR (376 MHz,  $\text{DMSO}-d_6$ )  $\delta$  -60.88, -112.16. HRMS (ESI): calcd. for  $\text{C}_{16}\text{H}_{13}\text{F}_4\text{N}_2\text{OS}$   $[\text{M}+\text{H}]^+$  357.0679; found 353.0677.

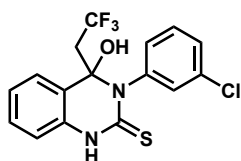

**3-(3-chlorophenyl)-4-hydroxy-4-(2,2,2-trifluoroethyl)-3,4-dihydroquinazoline-2(1H)-thione (6af):**

White solid; mp 224.1-227.4 °C;  $^1\text{H}$  NMR (400 MHz,  $\text{DMSO}-d_6$ )  $\delta$  10.60 (s, 1H), 10.10 (s, 1H), 8.40 (d,  $J = 8.5$  Hz, 1H), 7.97 – 7.91 (m, 1H), 7.75 (d,  $J = 2.1$  Hz, 1H), 7.66 – 7.60 (m, 1H), 7.38 (dd,  $J = 7.6, 2.0$  Hz, 1H), 7.32 (t,  $J = 8.0$  Hz, 1H), 7.15 (t,  $J = 7.6$  Hz, 1H), 7.05 (dd,  $J = 7.7, 2.1$  Hz, 1H), 4.49 (q,  $J = 10.7$  Hz, 2H).  $^{13}\text{C}$  NMR (100 MHz,  $\text{CDCl}_3$ )  $\delta$  195.22, 152.60, 141.76, 141.65, 137.34, 135.51, 133.62, 132.89, 132.10, 125.48 (q,  $J = 275$  Hz), 122.31, 121.74, 120.74, 118.45, 117.40, 43.08 (q,  $J = 26$  Hz).  $^{19}\text{F}$  NMR (376 MHz,  $\text{DMSO}-d_6$ )  $\delta$  -60.86. HRMS (ESI): calcd. for  $\text{C}_{16}\text{H}_{13}\text{ClF}_3\text{N}_2\text{OS}$   $[\text{M}+\text{H}]^+$  373.0384; found 373.0388.

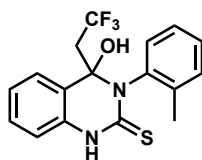

**4-hydroxy-3-(o-tolyl)-4-(2,2,2-trifluoroethyl)-3,4-dihydroquinazoline-2(1H)-thione (6ag):** White solid; mp 221.5-224.1 °C; <sup>1</sup>H NMR (400 MHz, DMSO-*d*<sub>6</sub>) δ 10.49 (s, 1H), 9.13 (s, 1H), 8.35 – 8.29 (m, 1H), 7.98 (dd, *J* = 8.1, 1.6 Hz, 1H), 7.64 – 7.55 (m, 1H), 7.46 (dd, *J* = 8.0, 1.5 Hz, 1H), 7.22 (dd, *J* = 7.5, 1.6 Hz, 1H), 7.19 – 7.02 (m, 3H), 4.46 (q, *J* = 10.7 Hz, 2H), 2.26 (s, 3H). <sup>13</sup>C NMR (100 MHz, CDCl<sub>3</sub>) δ 194.74 (q, *J* = 2 Hz), 153.42, 141.94, 137.10, 135.19, 131.83, 131.70, 130.78, 126.48, 125.74 (q, *J* = 275 Hz), 125.07, 124.90, 122.22 (q, *J* = 2 Hz), 121.44, 121.09, 43.59, 42.83 (q, *J* = 26 Hz). <sup>19</sup>F NMR (376 MHz, DMSO-*d*<sub>6</sub>) δ -60.87. HRMS (ESI): calcd. for C<sub>17</sub>H<sub>16</sub>F<sub>3</sub>N<sub>2</sub>OS [M+H]<sup>+</sup> 353.0930; found 353.0933.

## 5. Copies of all NMR spectra

$^1\text{H}$  NMR (400 MHz,  $\text{CDCl}_3$ ) of **4aa**

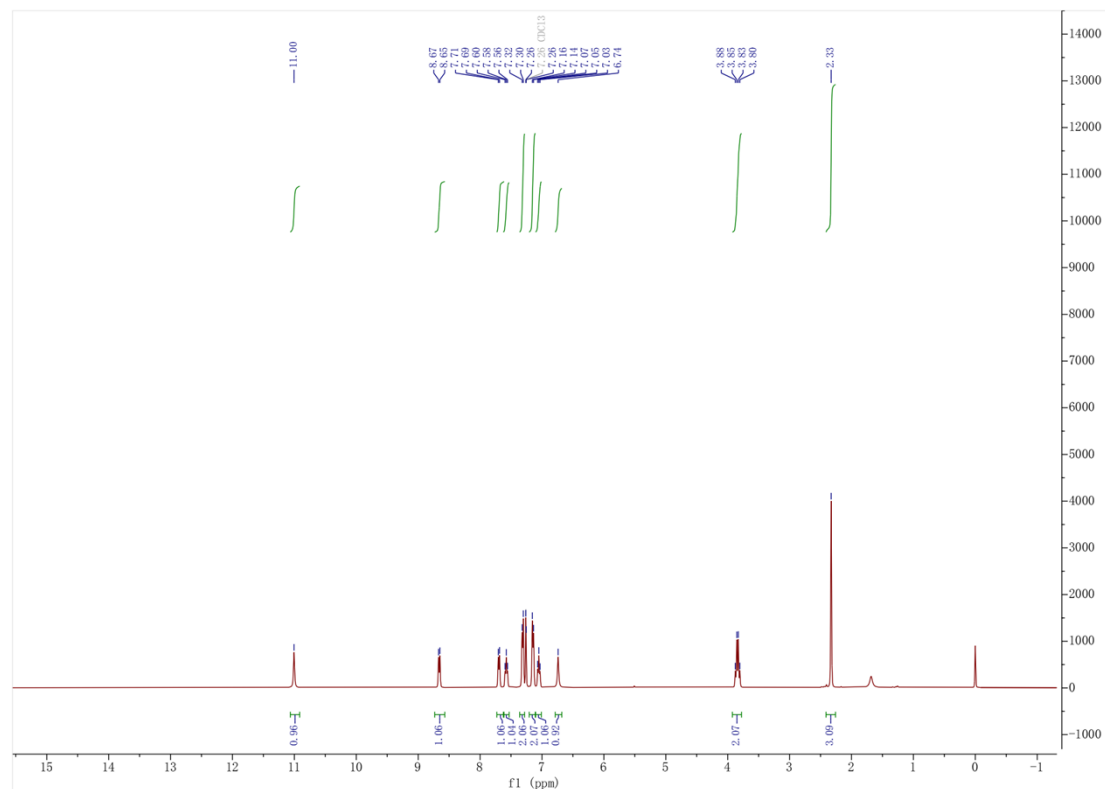

$^{13}\text{C}$  NMR (100 MHz,  $\text{CDCl}_3$ ) of **4aa**

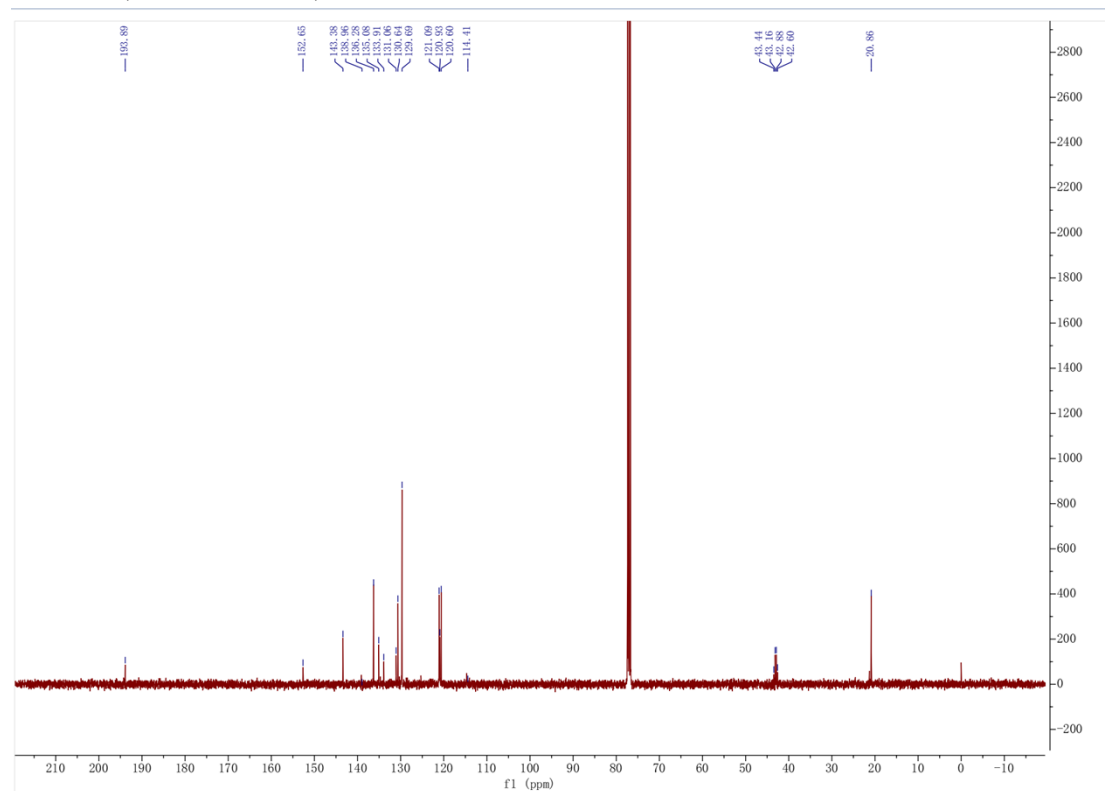



<sup>19</sup>F NMR (376 MHz, CDCl<sub>3</sub>) of **4aa**

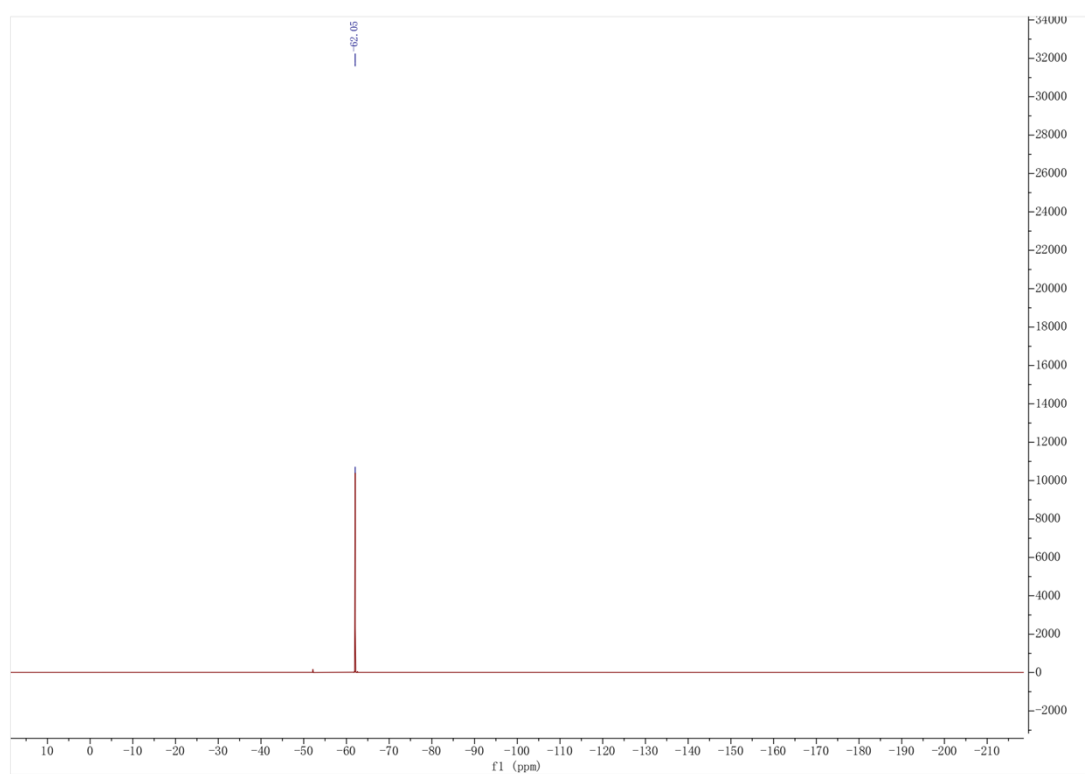

<sup>1</sup>H NMR (400 MHz, DMSO-d<sub>6</sub>) of **4ab**

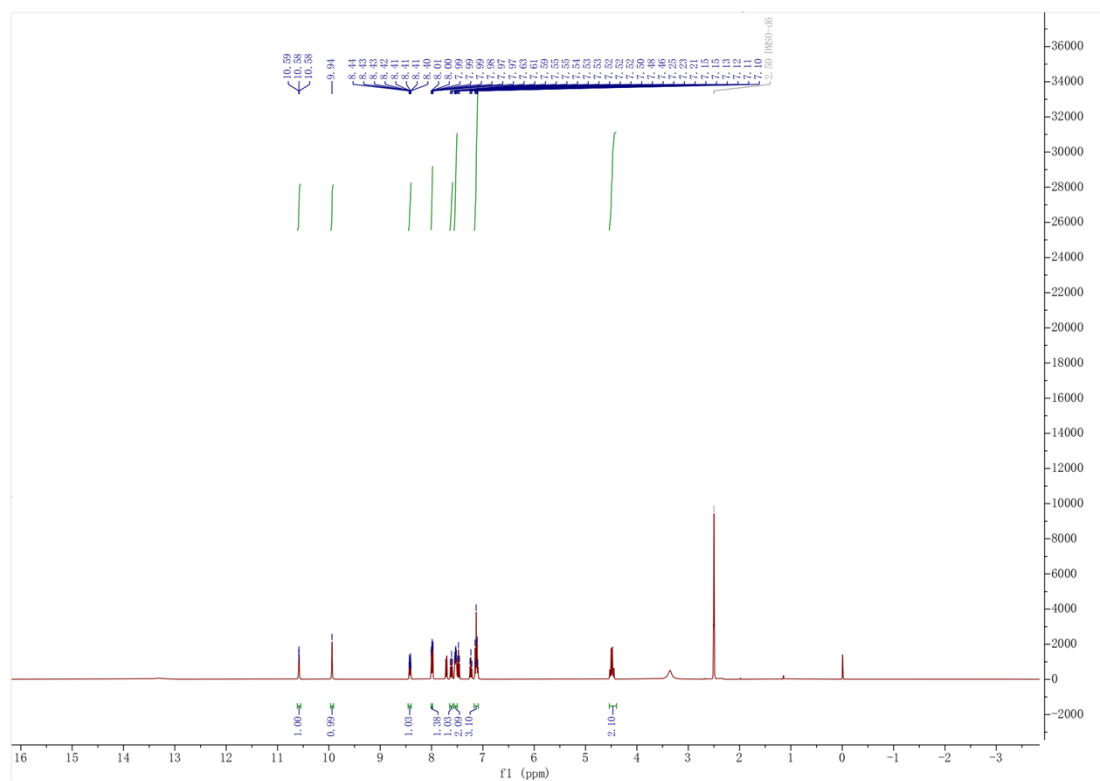

$^{13}\text{C}$  NMR (100 MHz,  $\text{DMSO-}d_6$ ) of **4ab**

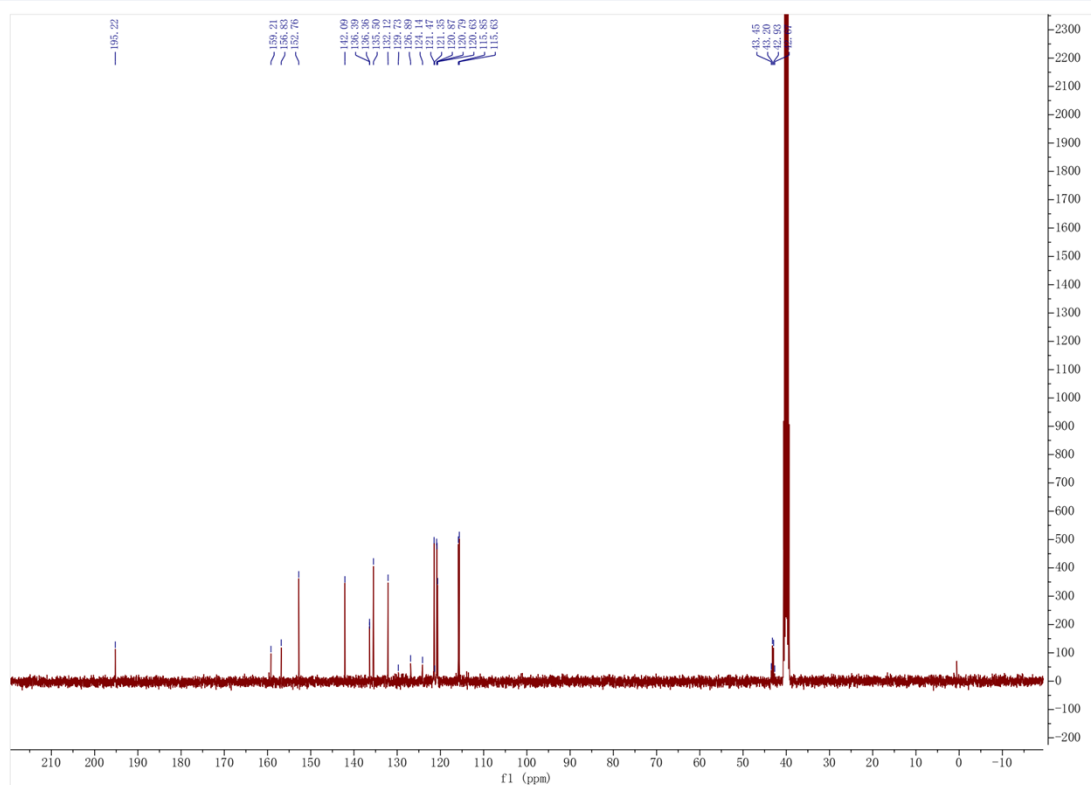

$^{19}\text{F}$  NMR (376 MHz,  $\text{DMSO-}d_6$ ) of **4ab**

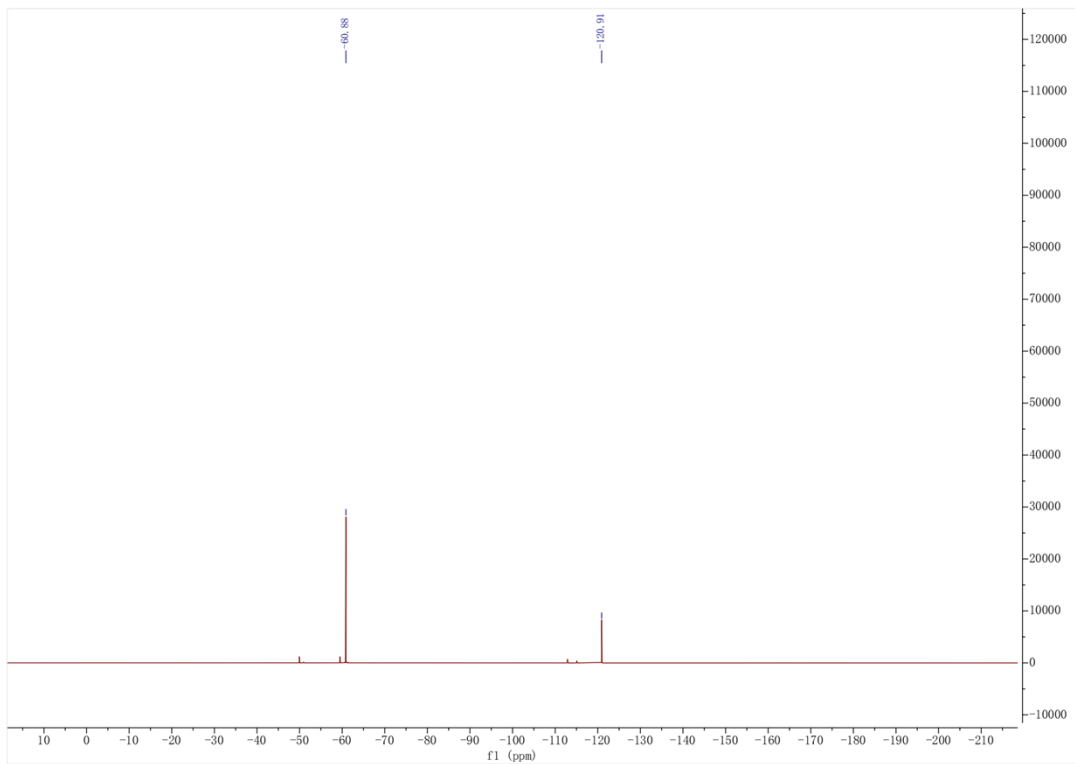

$^1\text{H}$  NMR (400 MHz,  $\text{DMSO-}d_6$ ) of **4ac**

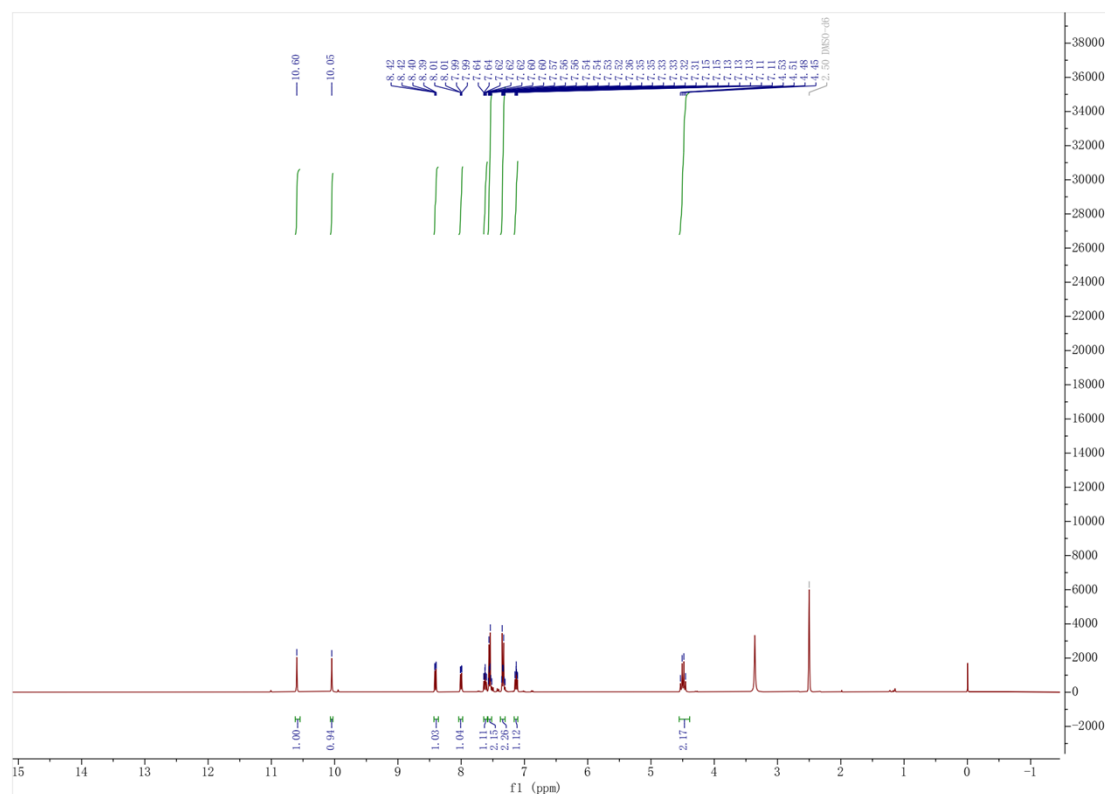

$^{13}\text{C}$  NMR (100 MHz,  $\text{DMSO-}d_6$ ) of **4ac**

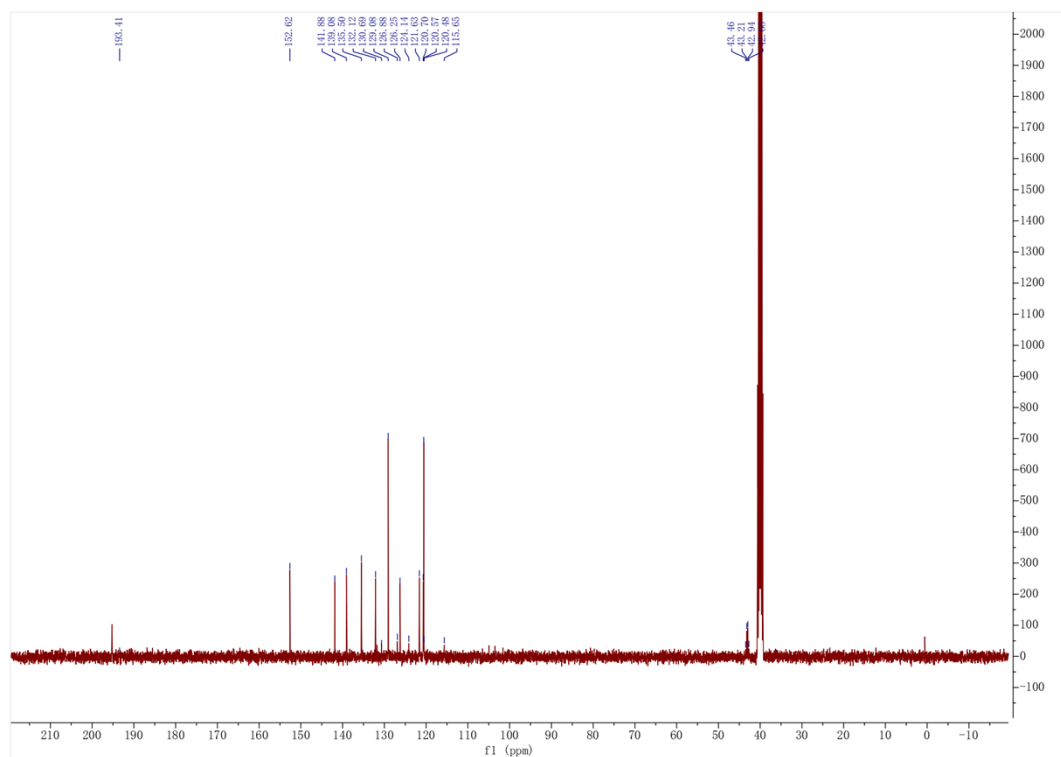

$^{19}\text{F}$  NMR (376 MHz,  $\text{DMSO-}d_6$ ) of **4ac**

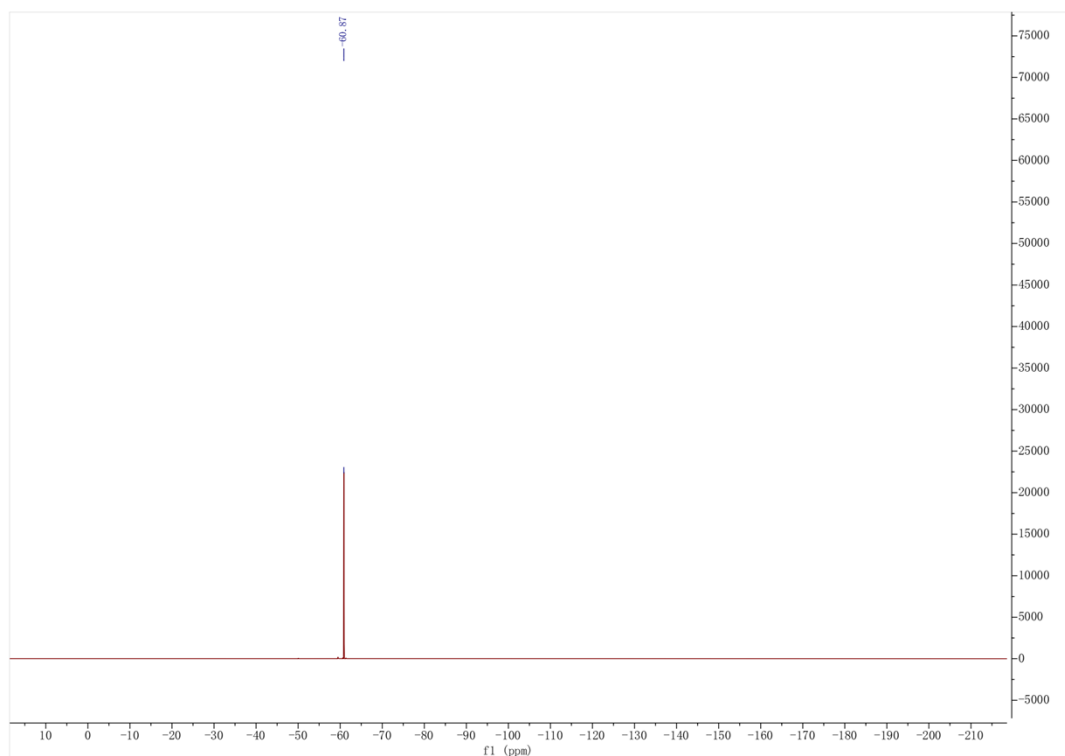

$^1\text{H}$  NMR (400 MHz,  $\text{DMSO-}d_6$ ) of **4ad**

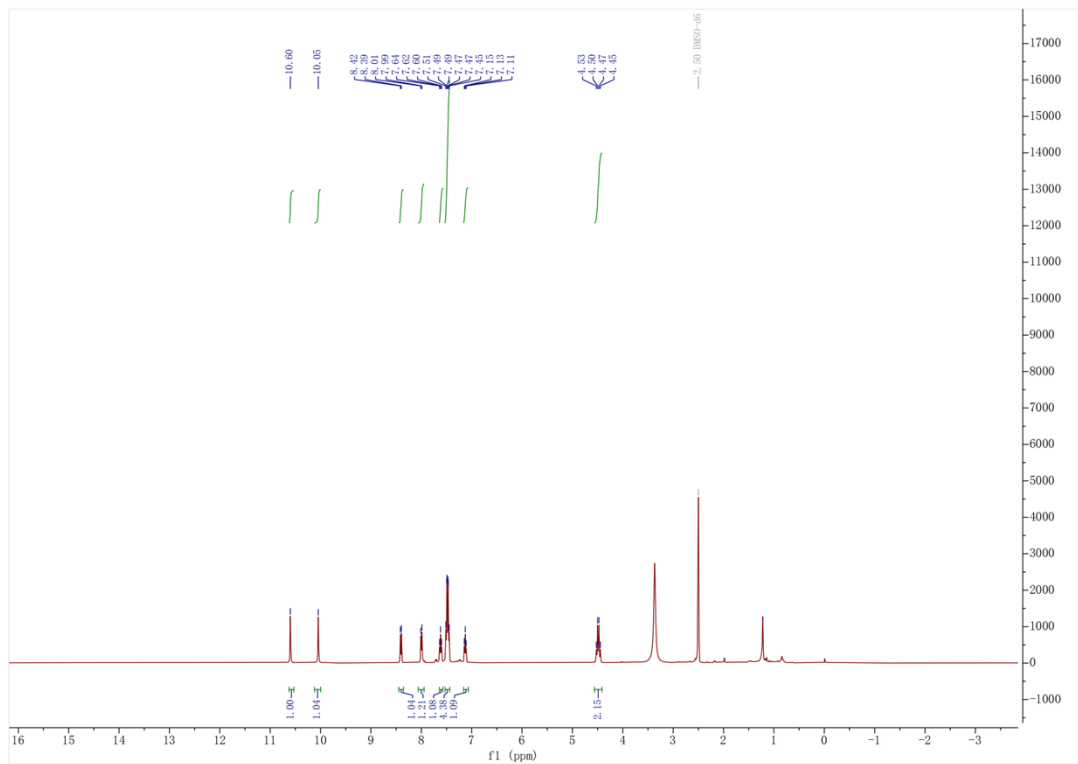

<sup>13</sup>C NMR (100 MHz, DMSO-*d*<sub>6</sub>) of **4ad**

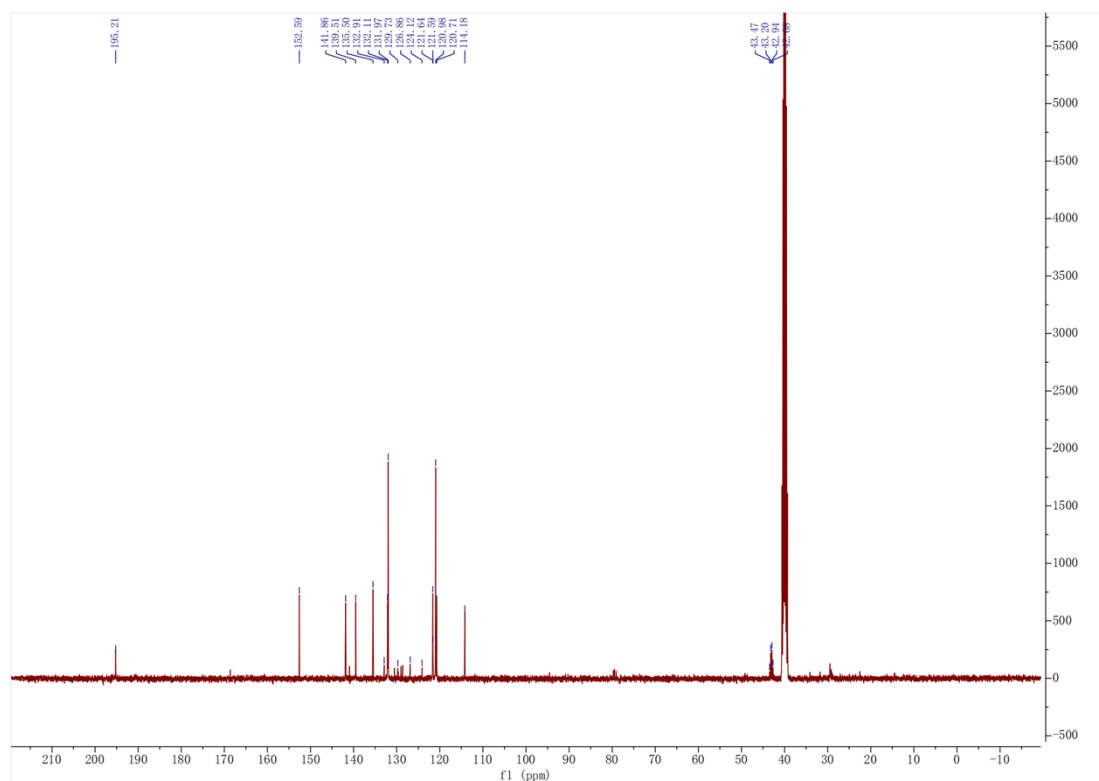

<sup>19</sup>F NMR (376 MHz, DMSO-*d*<sub>6</sub>) of **4ad**

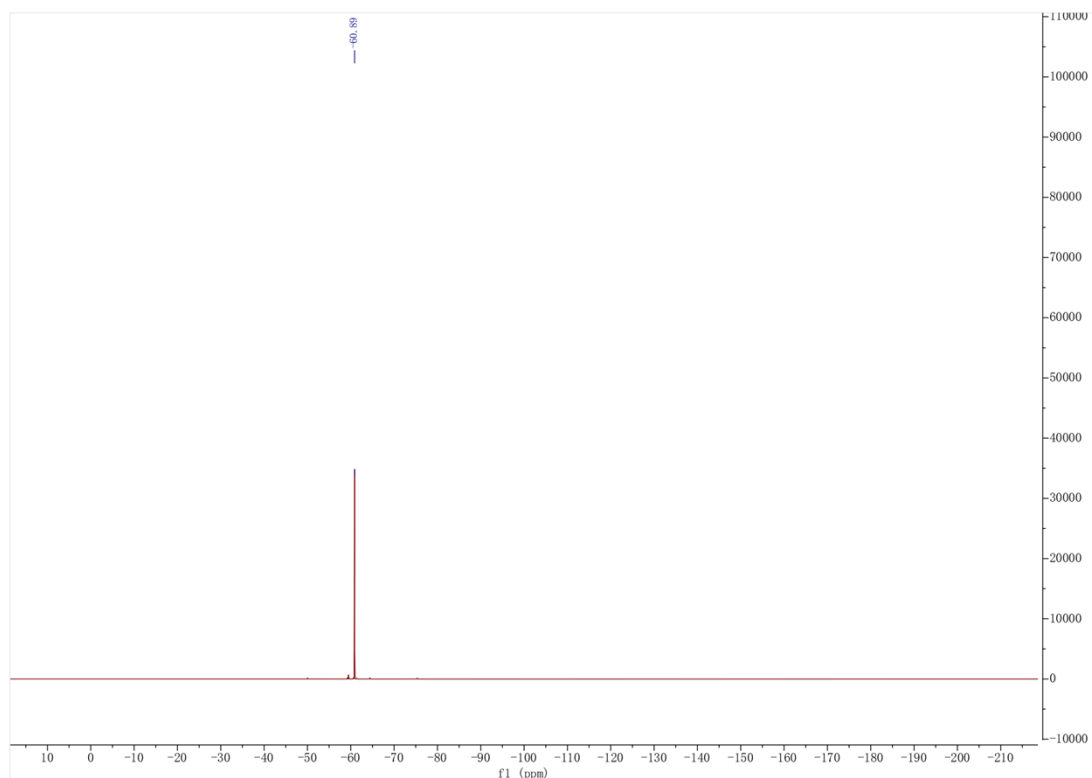

<sup>1</sup>H NMR (400 MHz, DMSO-*d*<sub>6</sub>) of **4ac**

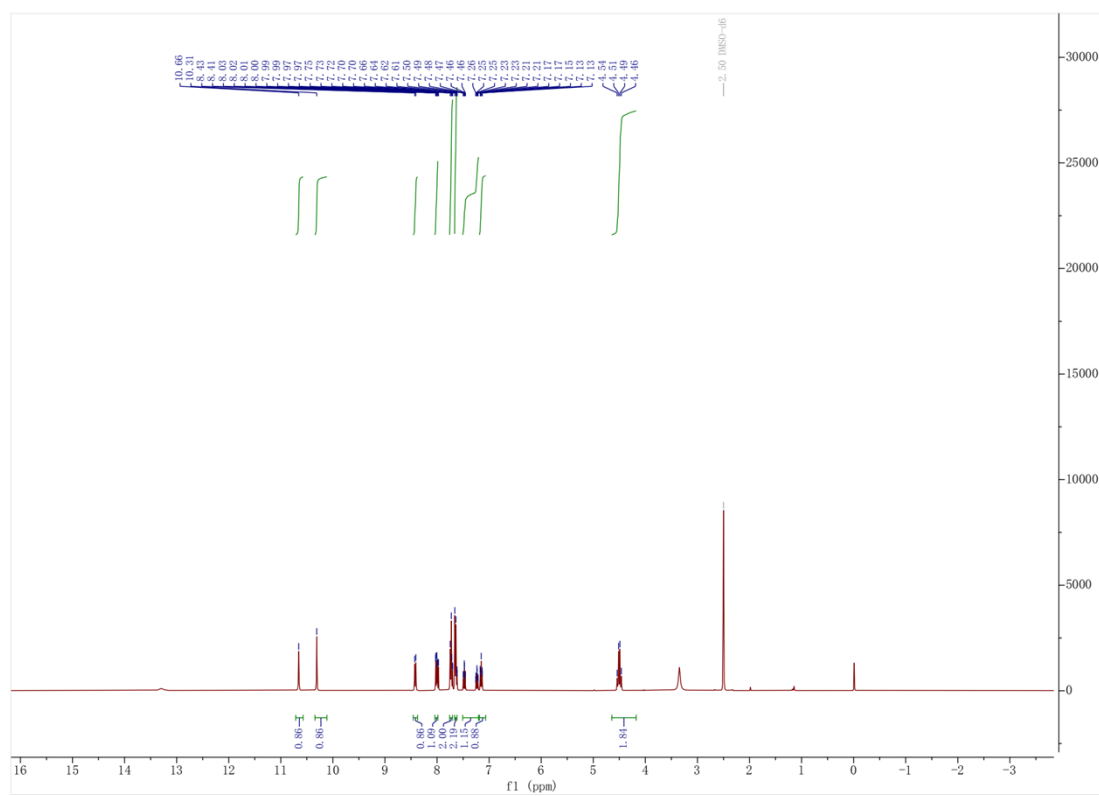

<sup>13</sup>C NMR (100 MHz, DMSO-*d*<sub>6</sub>) of **4ac**

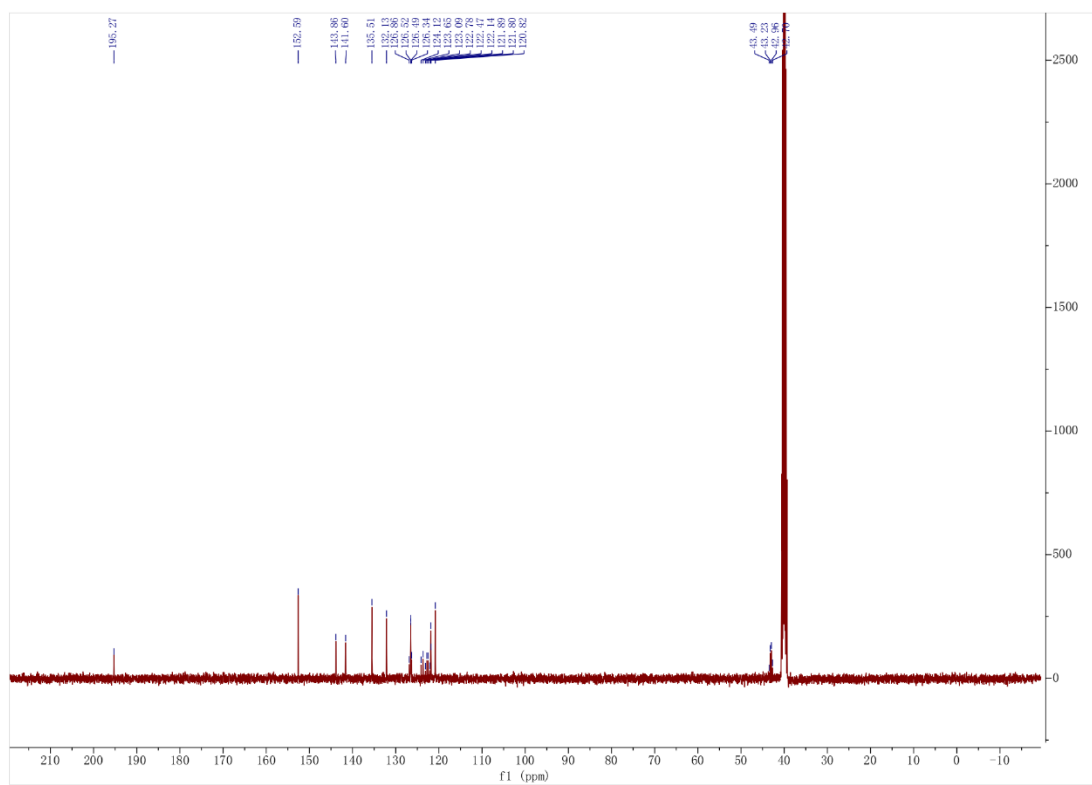

$^{19}\text{F}$  NMR (376 MHz,  $\text{DMSO-}d_6$ ) of **4ae**

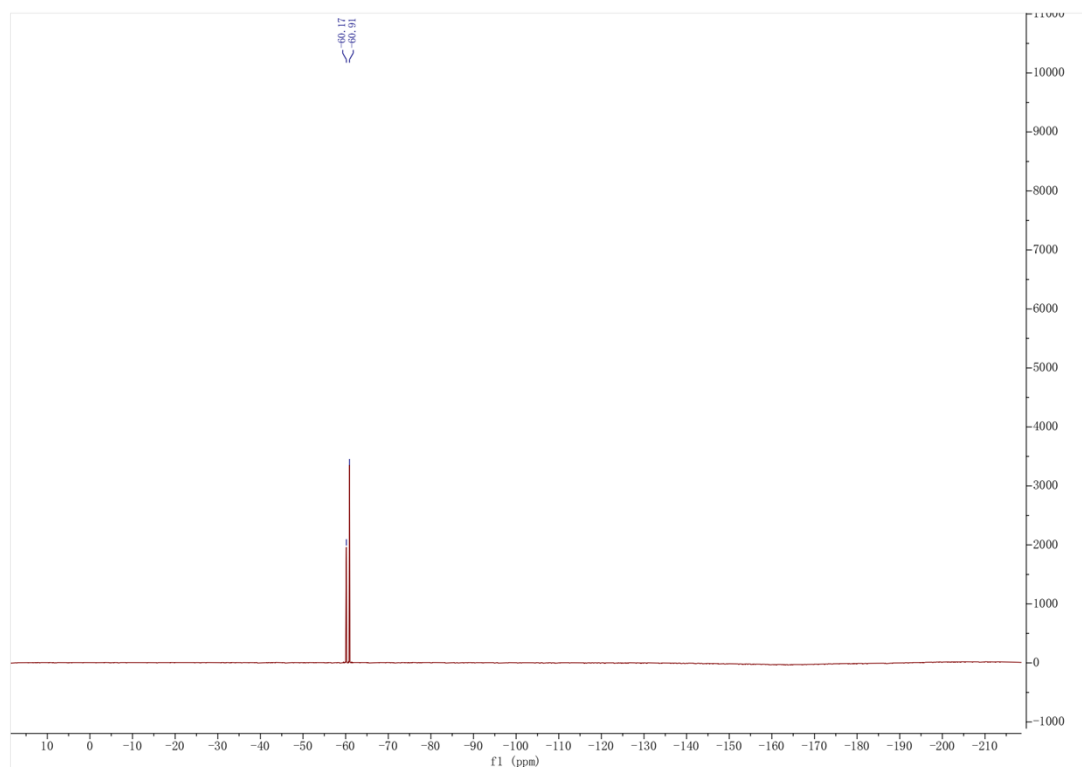

$^1\text{H}$  NMR (400 MHz,  $\text{DMSO-}d_6$ ) of **4af**

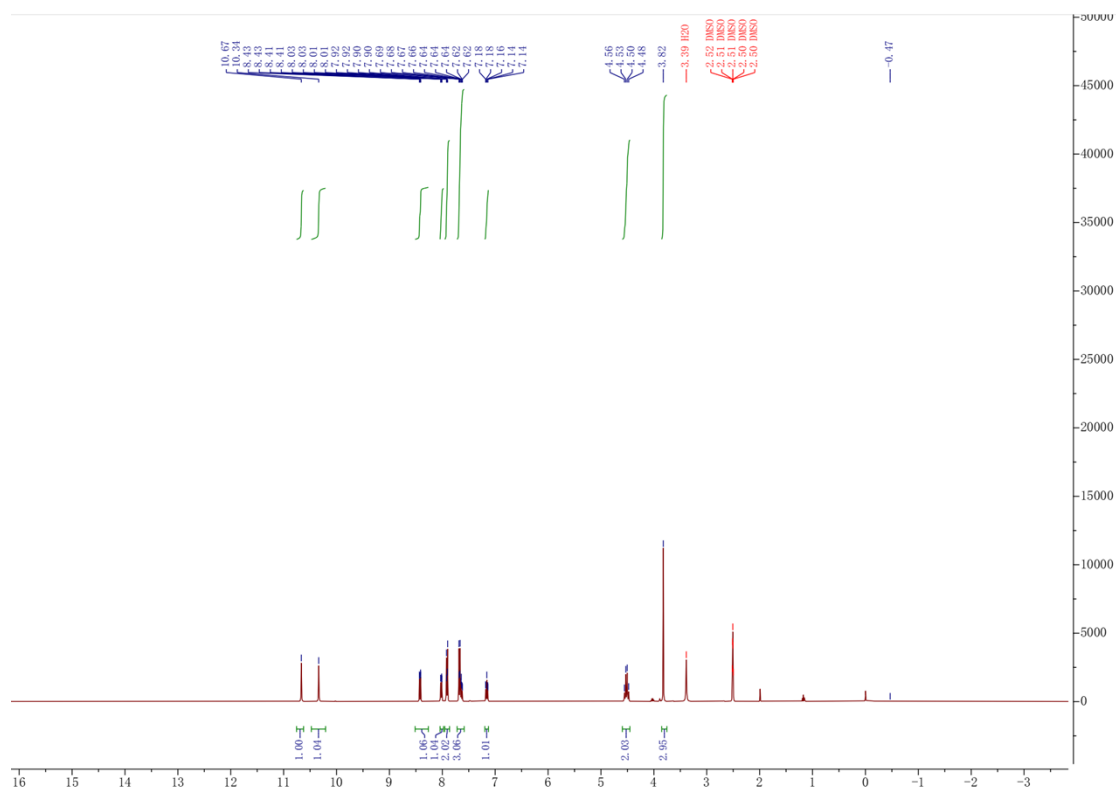

$^{13}\text{C}$  NMR (100 MHz,  $\text{DMSO-}d_6$ ) of **4af**

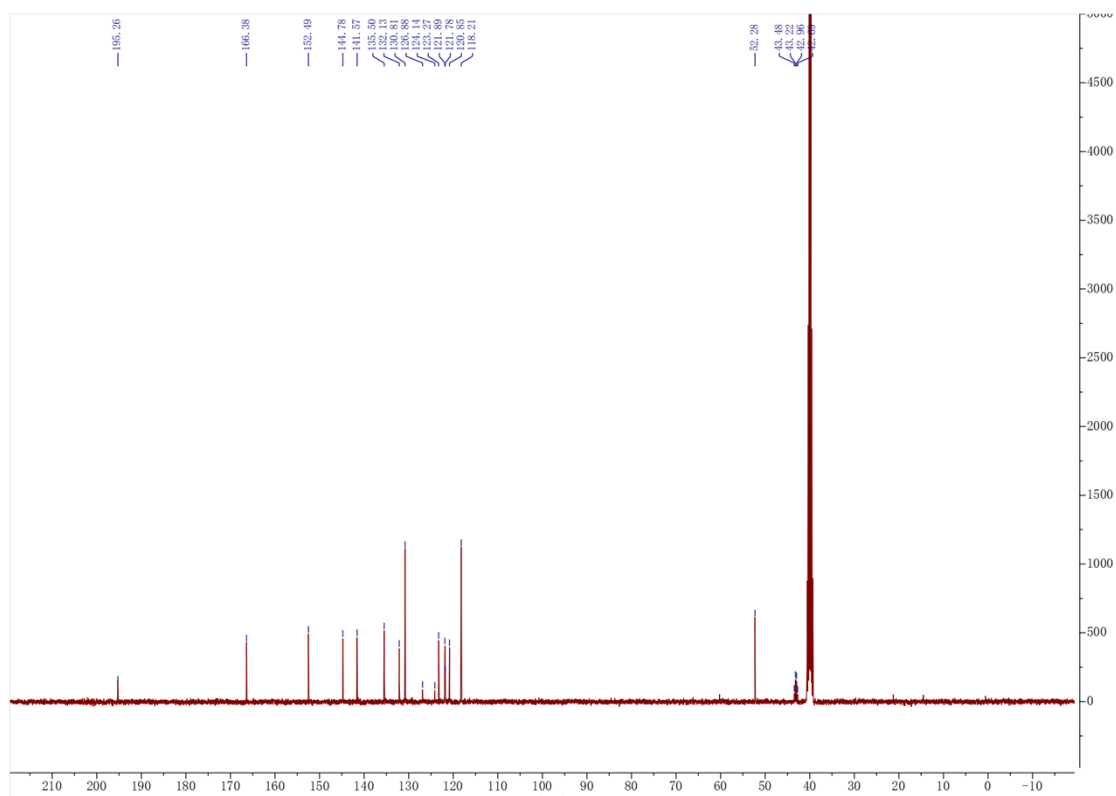

$^{19}\text{F}$  NMR (400 MHz,  $\text{DMSO-}d_6$ ) of **4af**

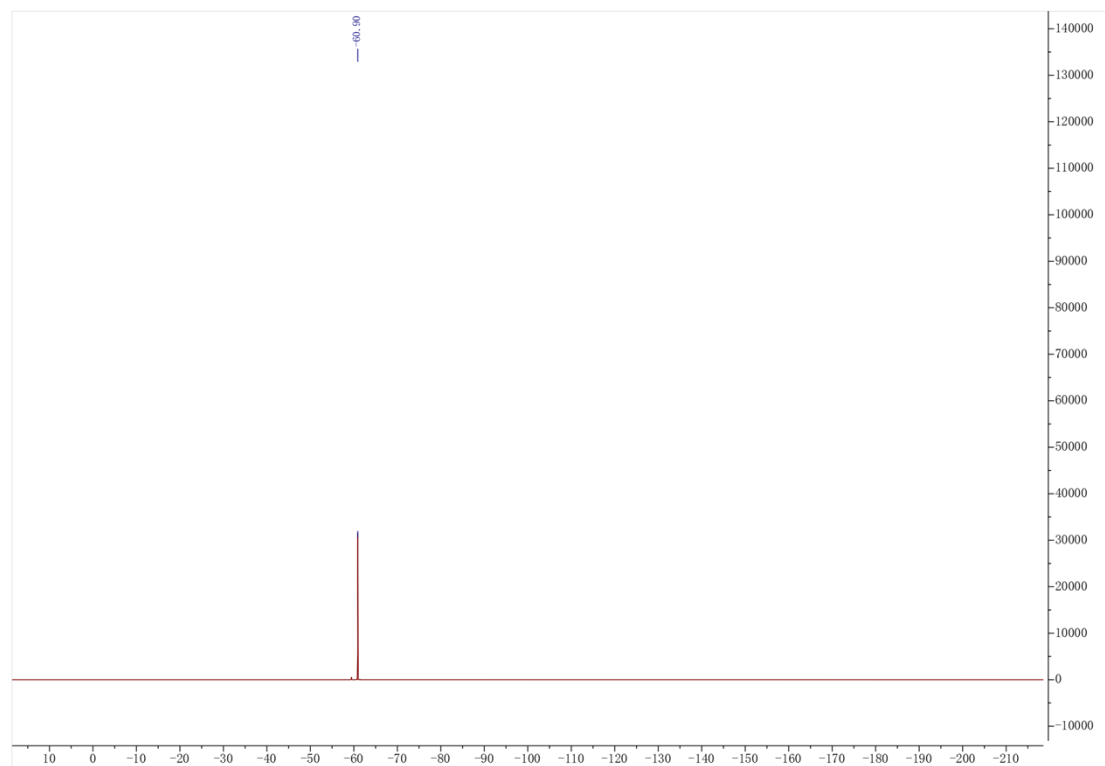



<sup>1</sup>H NMR (400 MHz, DMSO-*d*<sub>6</sub>) of **4ah**

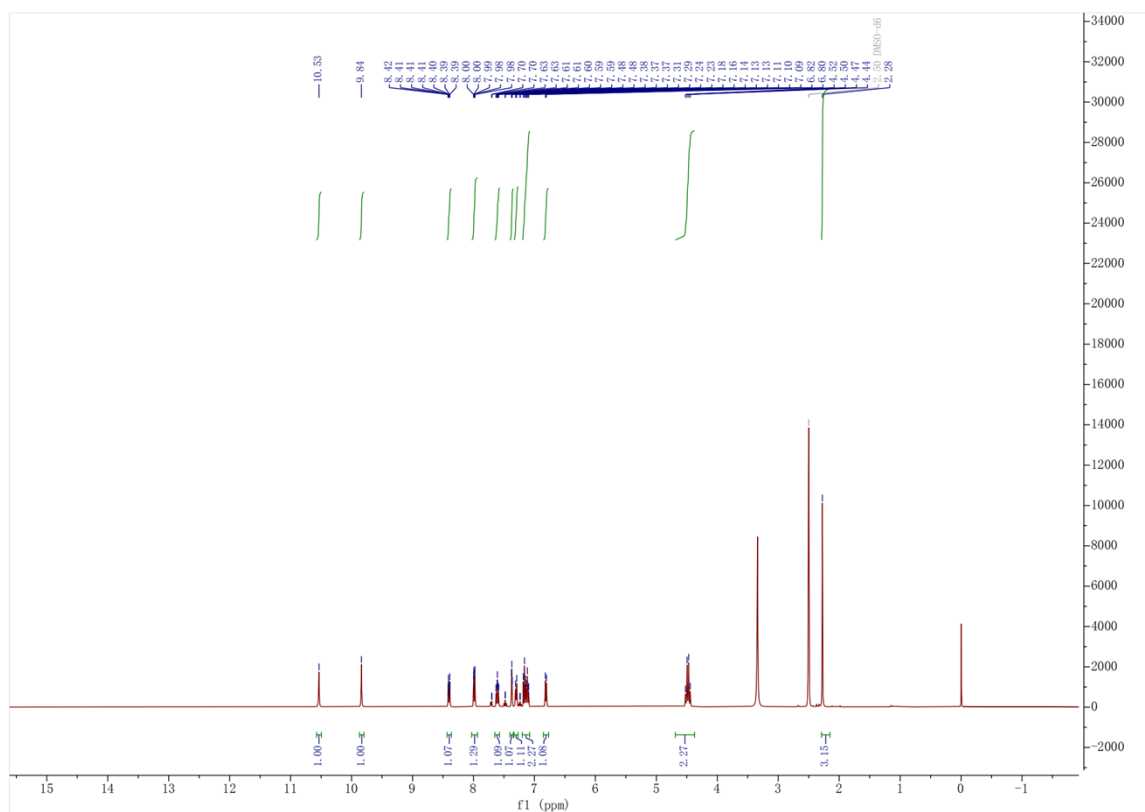

<sup>19</sup>F NMR (400 MHz, DMSO-*d*<sub>6</sub>) of **4ah**

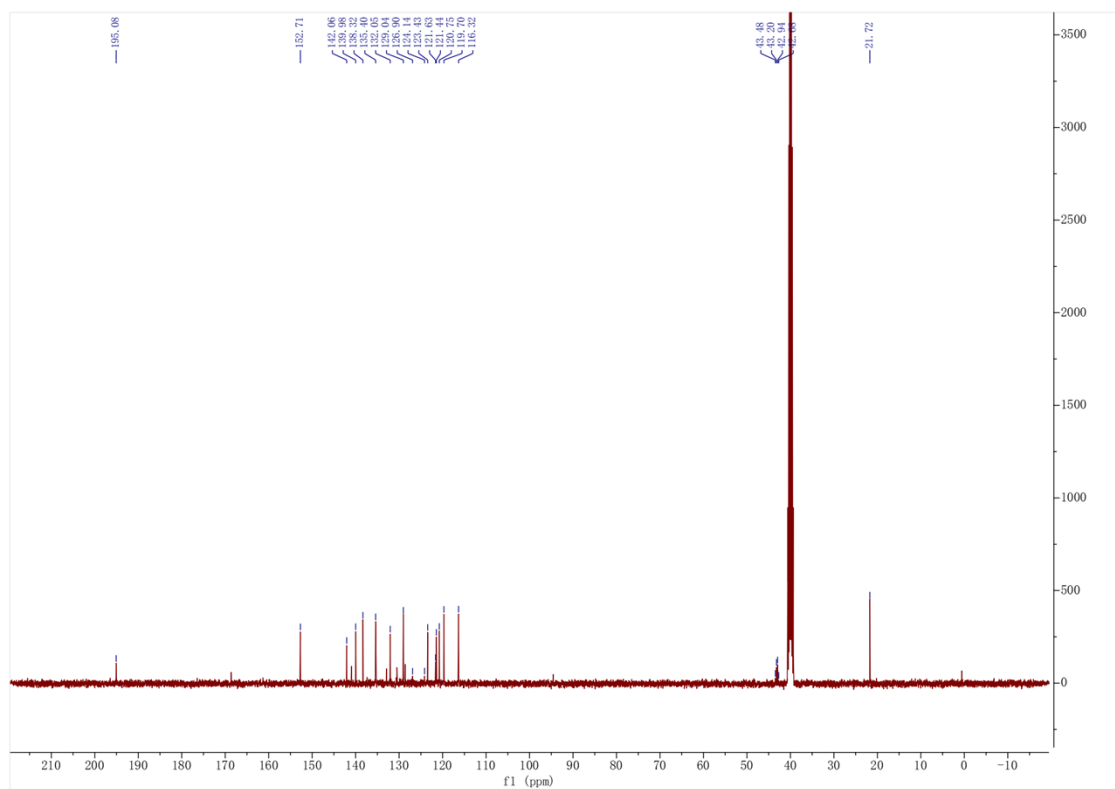

$^{19}\text{F}$  NMR (376 MHz,  $\text{DMSO-}d_6$ ) of **4ah**

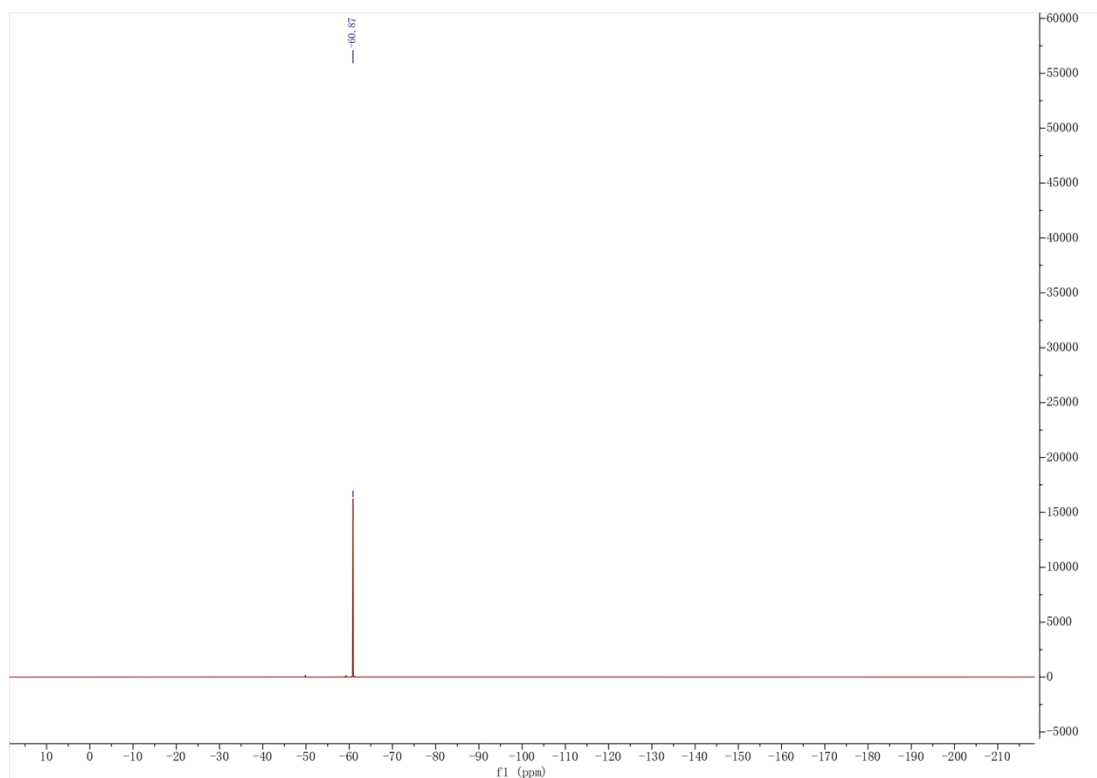

$^1\text{H}$  NMR (400 MHz,  $\text{DMSO-}d_6$ ) of **4ai**

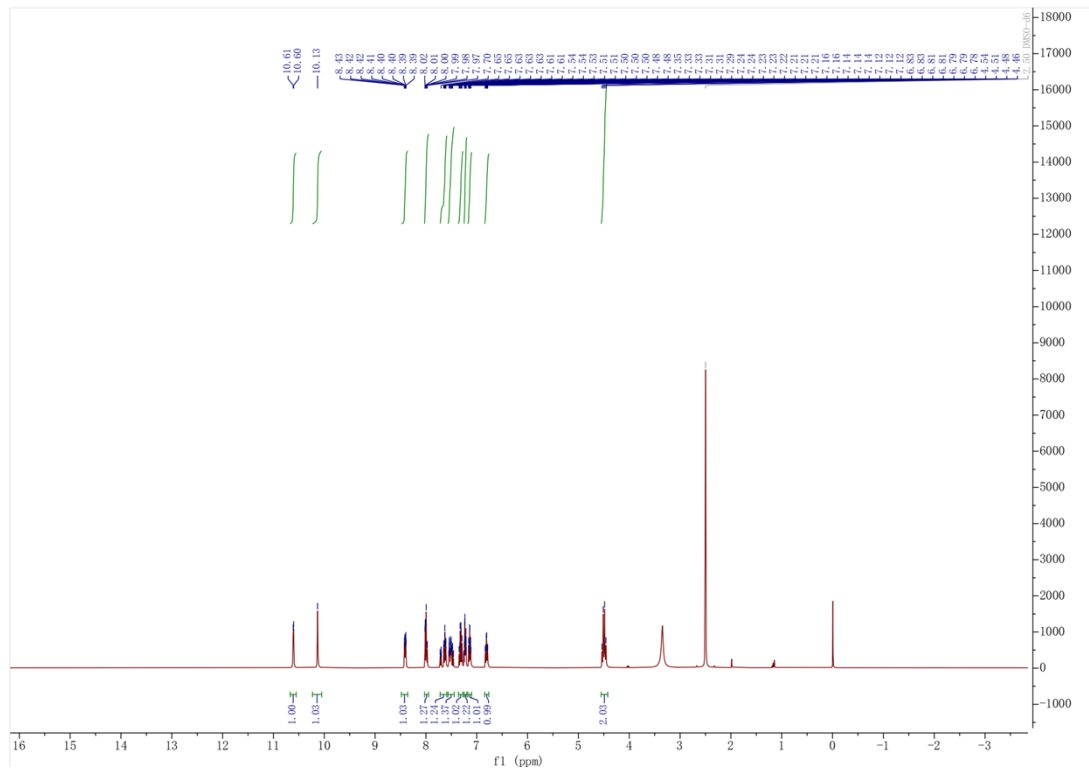

$^{13}\text{C}$  NMR (100 MHz,  $\text{DMSO-}d_6$ ) of **4ai**

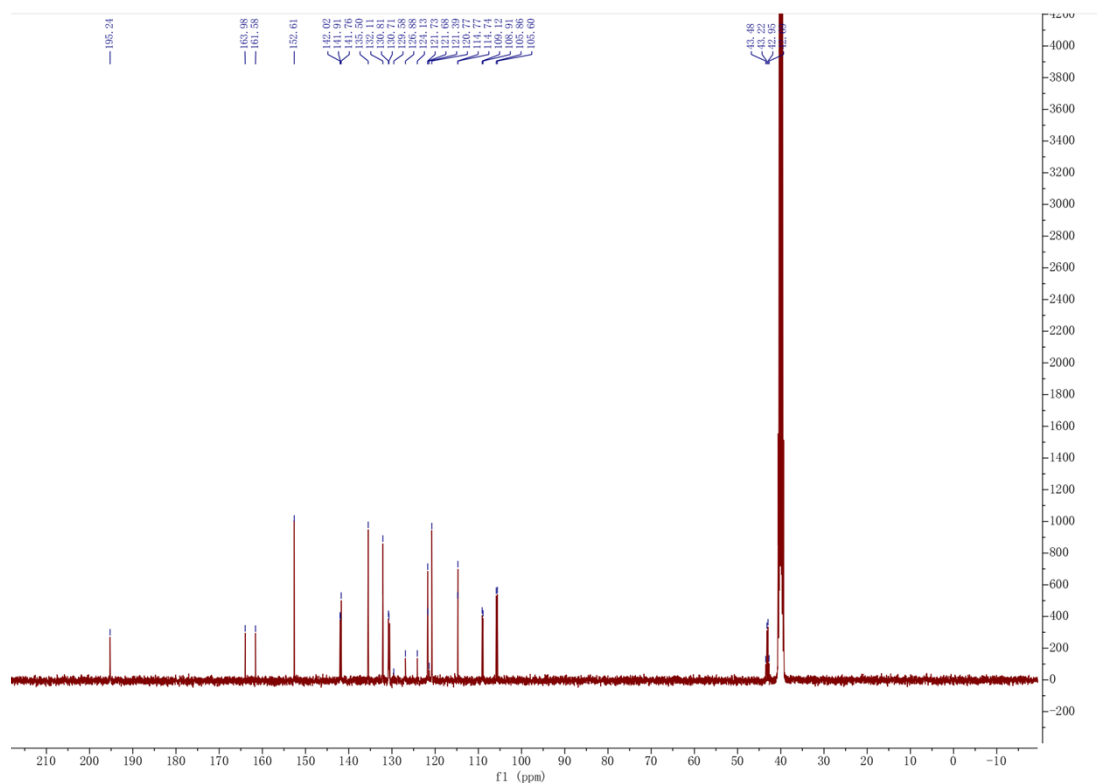

$^{19}\text{F}$  NMR (376 MHz,  $\text{DMSO-}d_6$ ) of **4ai**

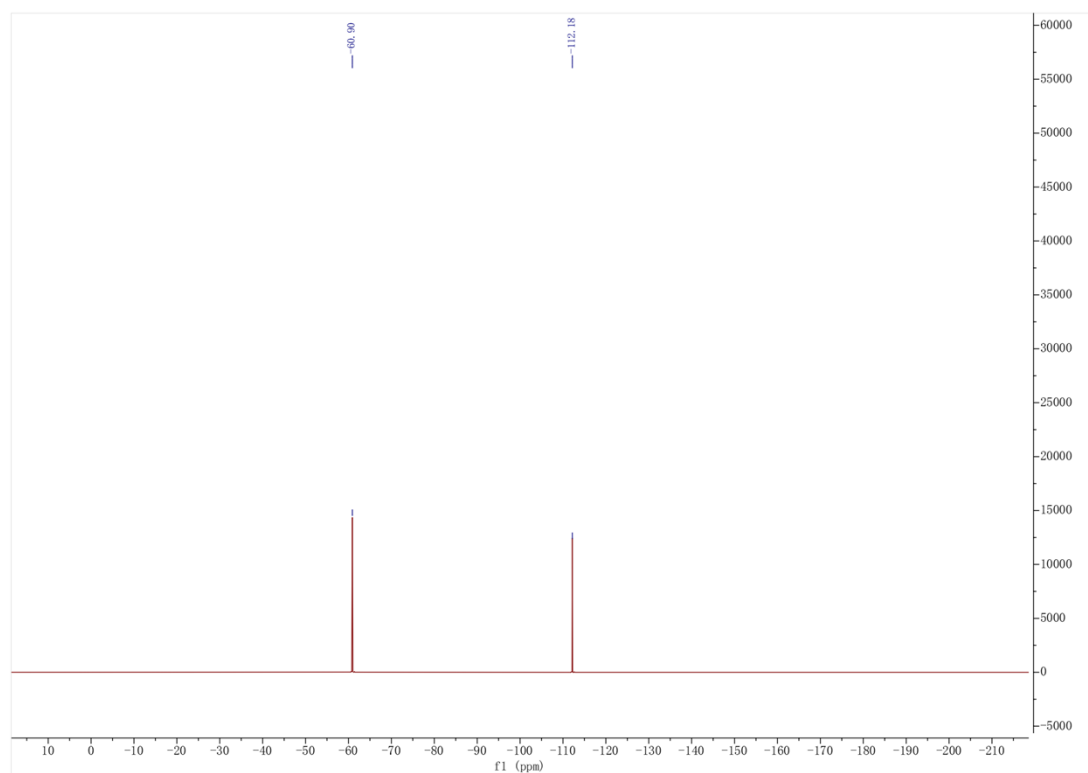

$^1\text{H}$  NMR (400 MHz,  $\text{DMSO-}d_6$ ) of **4aj**

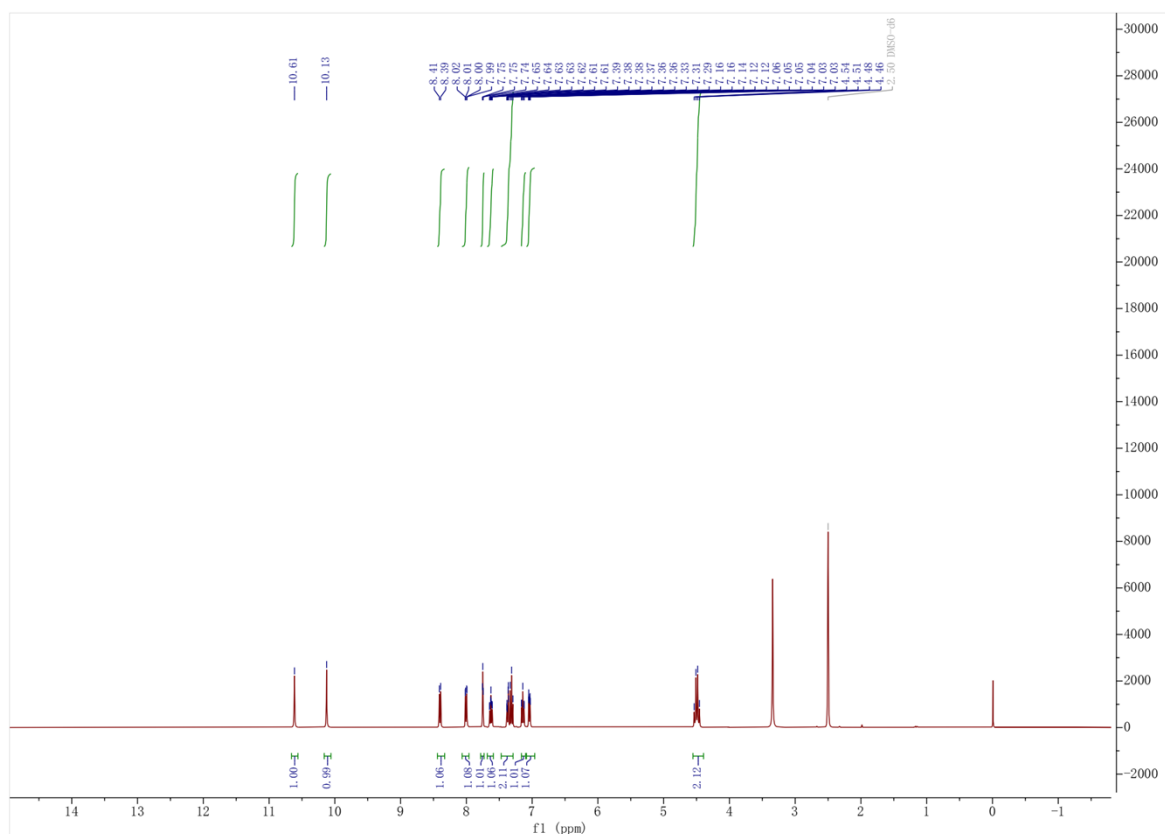

$^{13}\text{C}$  NMR (100 MHz,  $\text{DMSO-}d_6$ ) of **4aj**

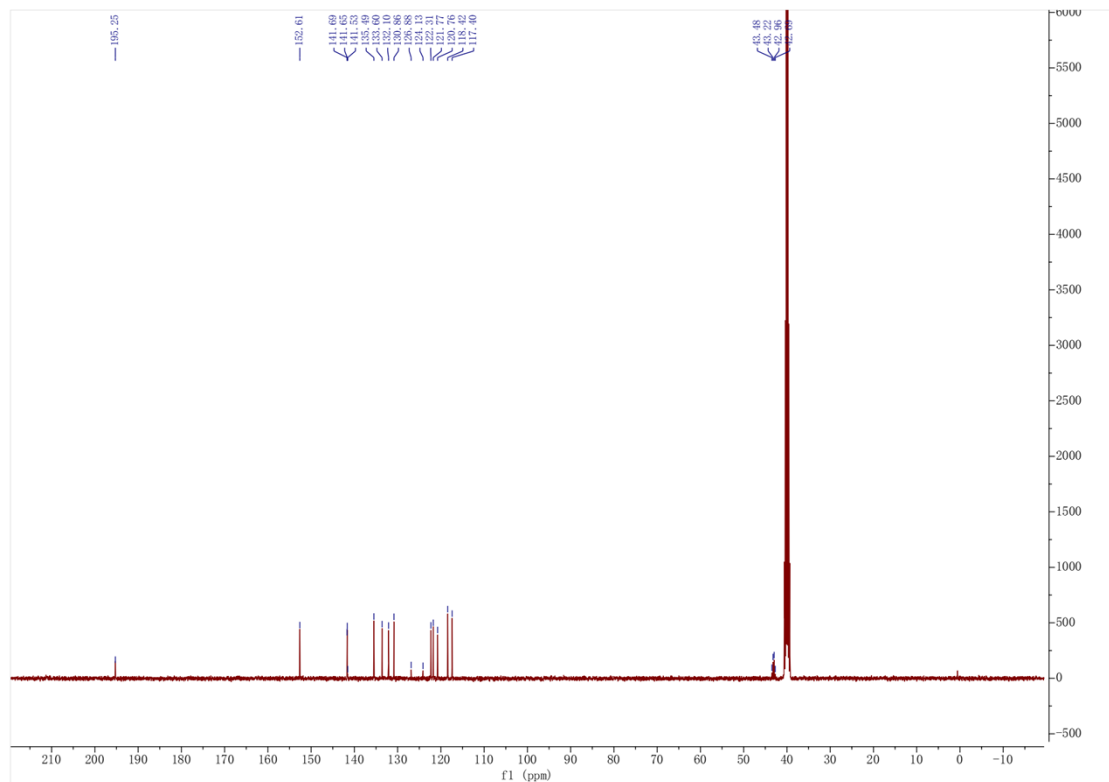

$^{19}\text{F}$  NMR (376 MHz,  $\text{DMSO-}d_6$ ) of **4aj**

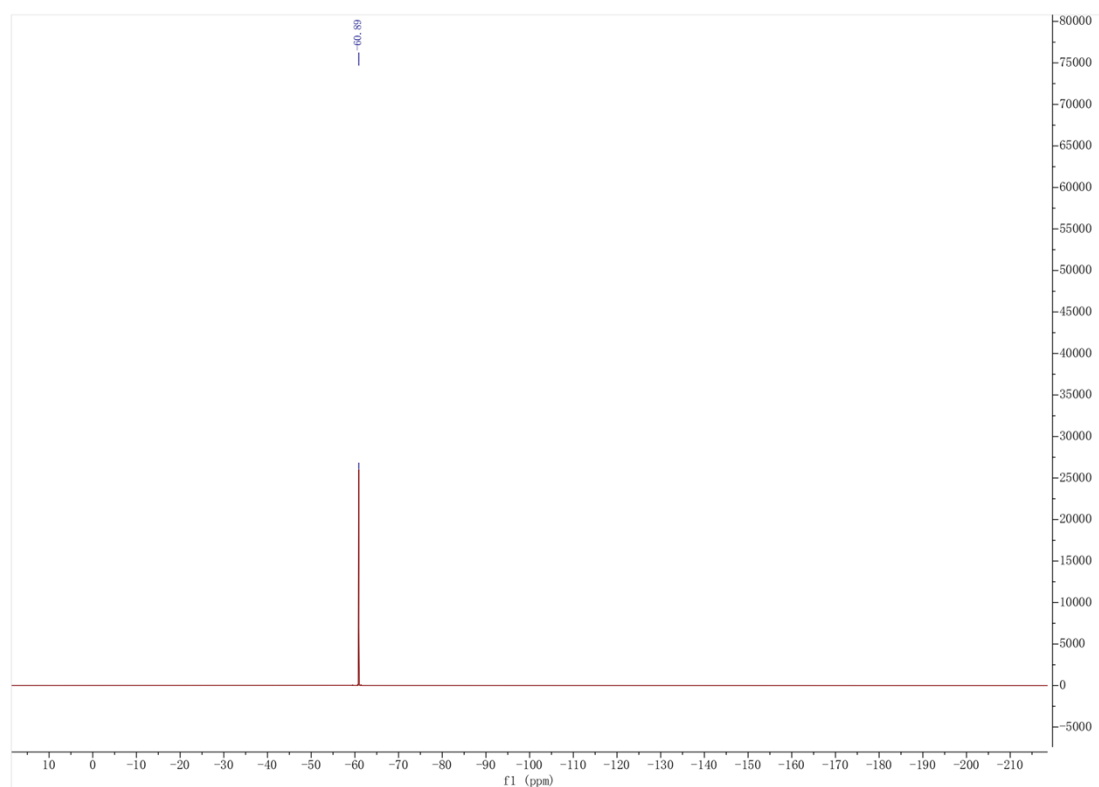

$^1\text{H}$  NMR (400 MHz,  $\text{DMSO-}d_6$ ) of **4ak**

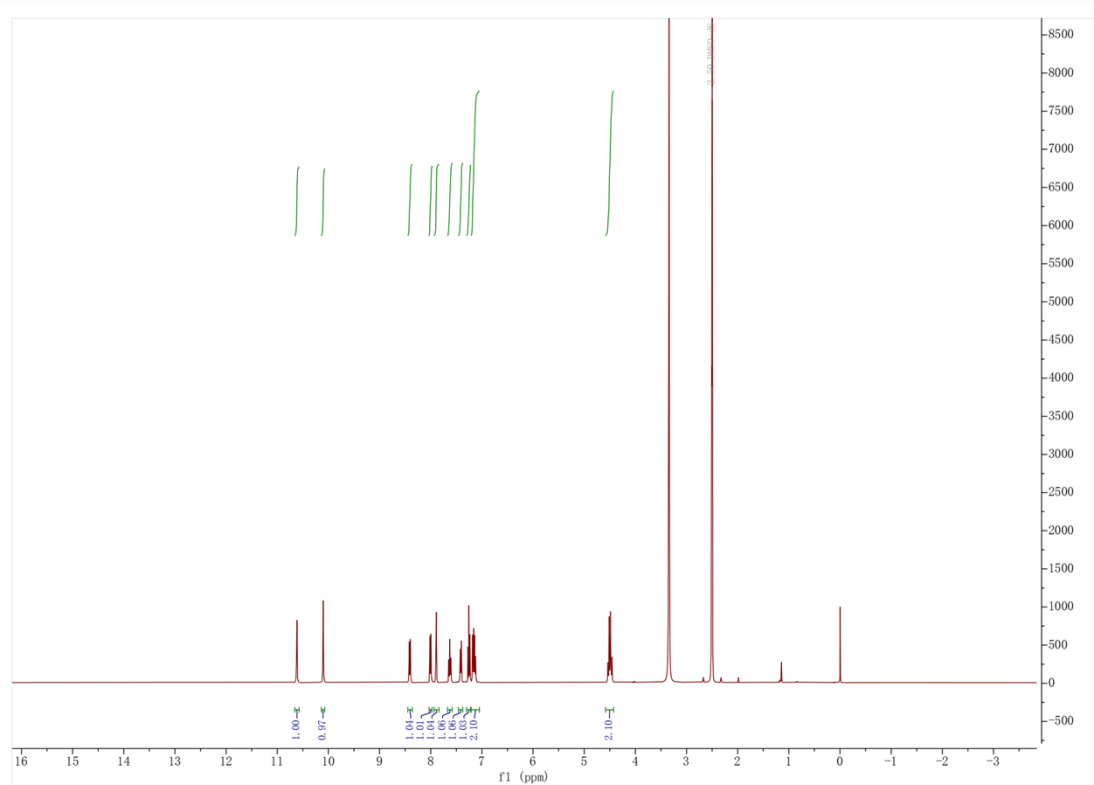

$^{13}\text{C}$  NMR (100 MHz,  $\text{DMSO-}d_6$ ) of **4ak**

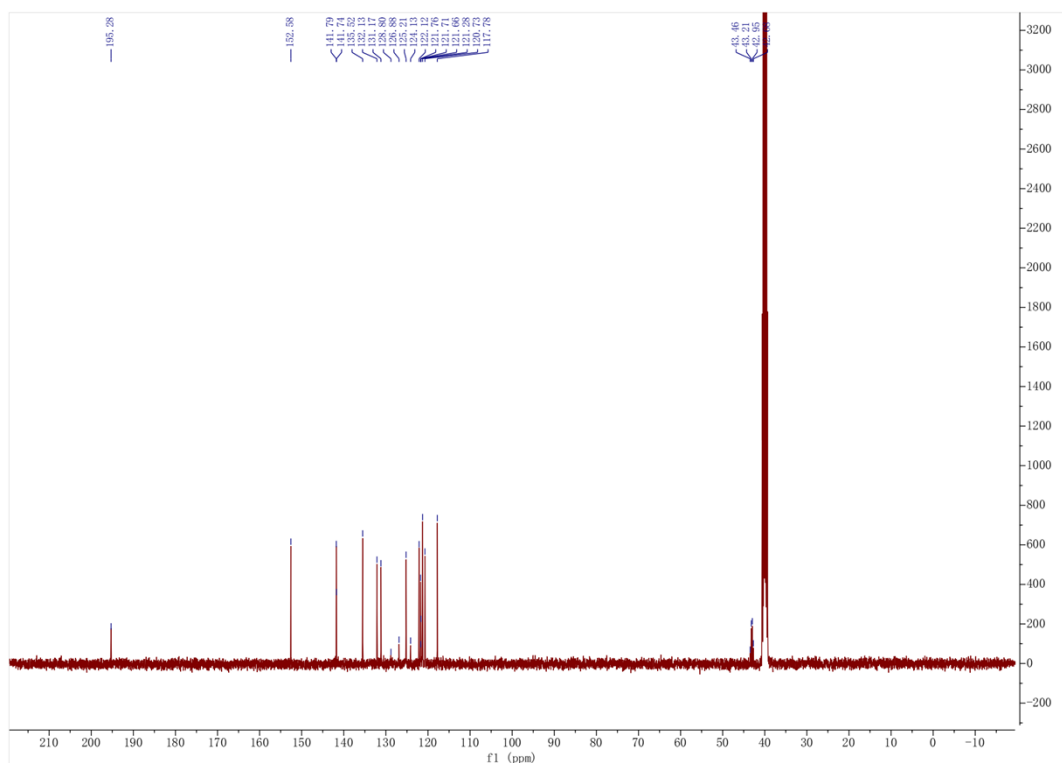

$^{19}\text{F}$  NMR (376 MHz,  $\text{DMSO-}d_6$ ) of **4ak**

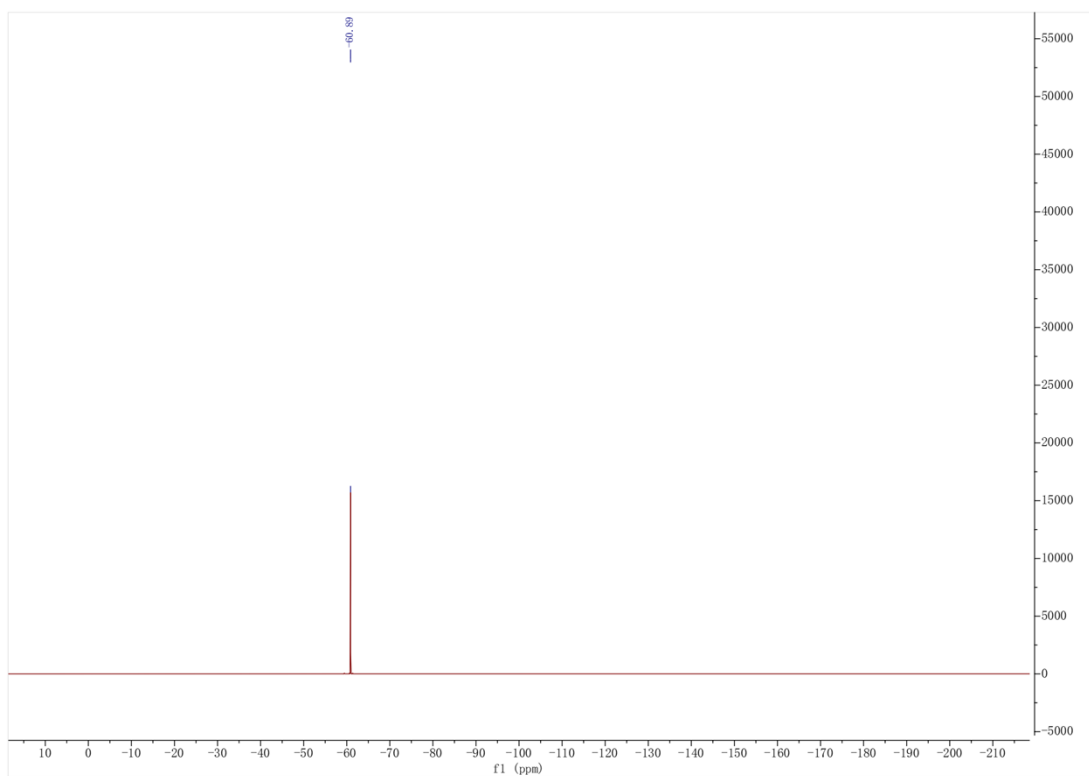

<sup>1</sup>H NMR (400 MHz, DMSO-d<sub>6</sub>) of **4al**

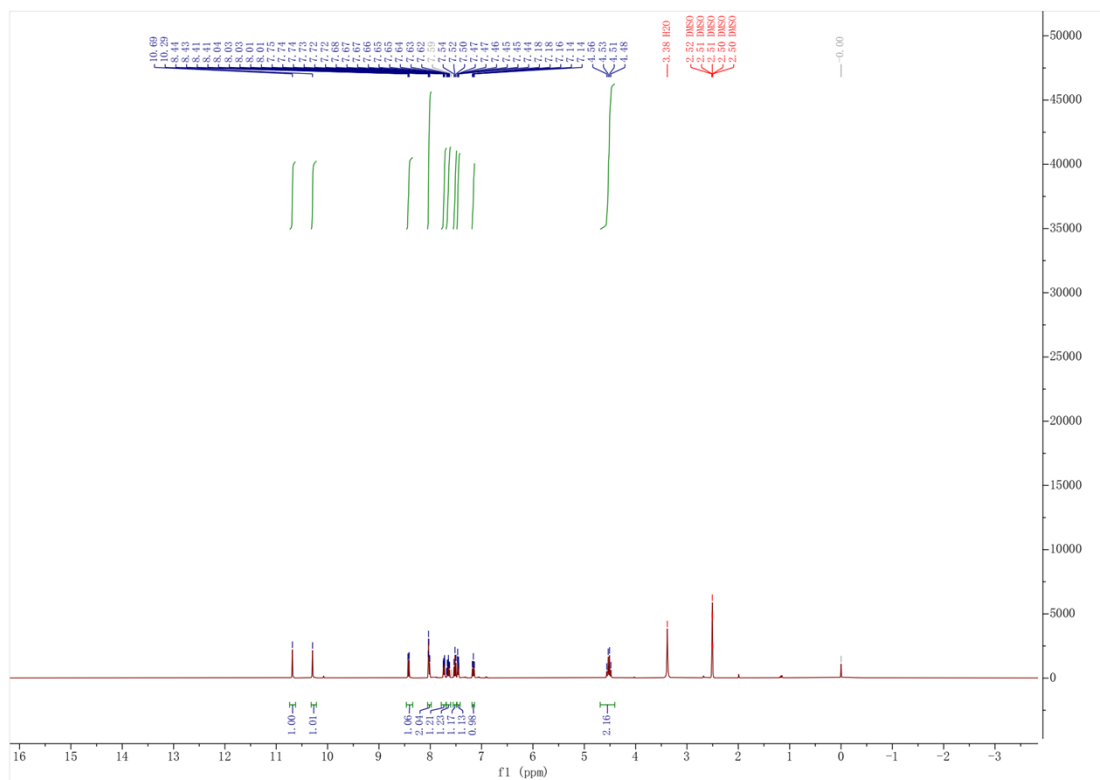

<sup>13</sup>C NMR (100 MHz, DMSO-d<sub>6</sub>) of **4al**

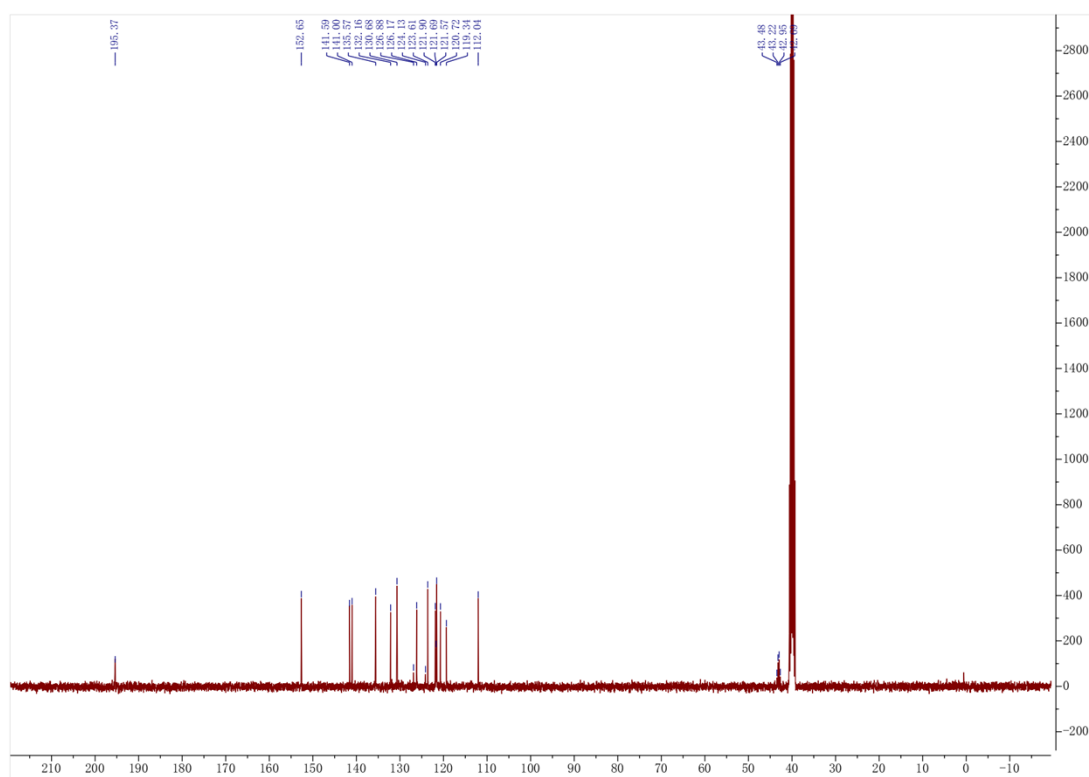

<sup>19</sup>F NMR (376 MHz, DMSO-*d*<sub>6</sub>) of **4al**

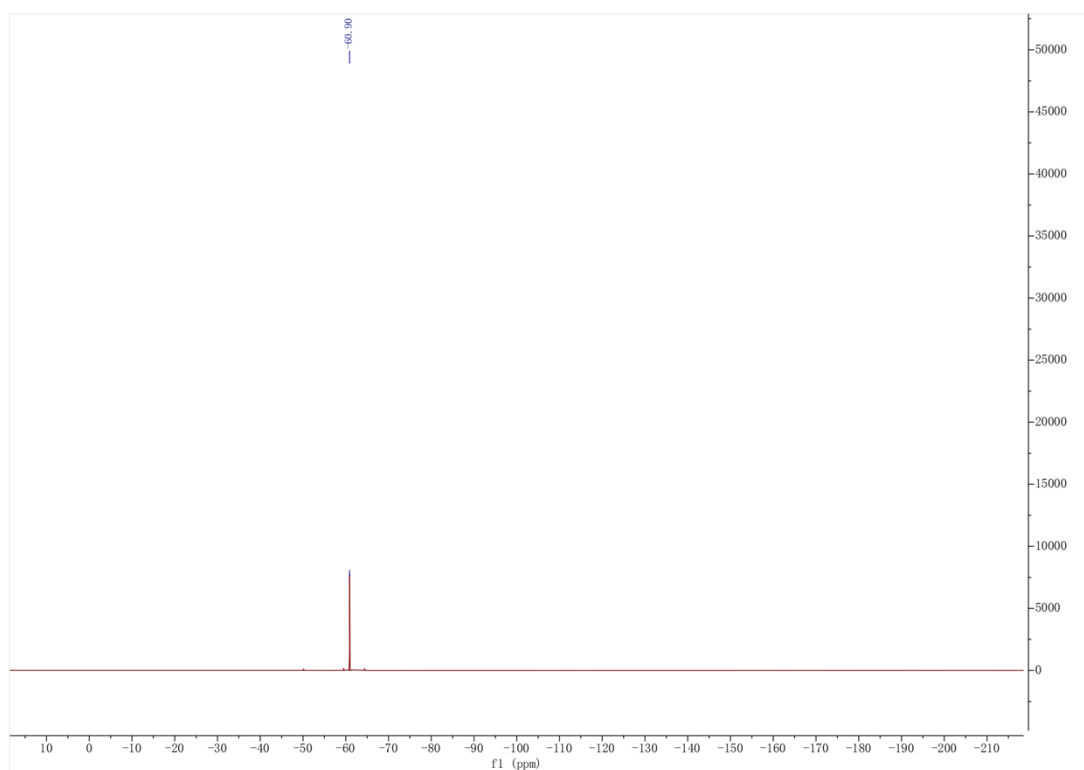

<sup>1</sup>H NMR (400 MHz, DMSO-*d*<sub>6</sub>) of **4am**

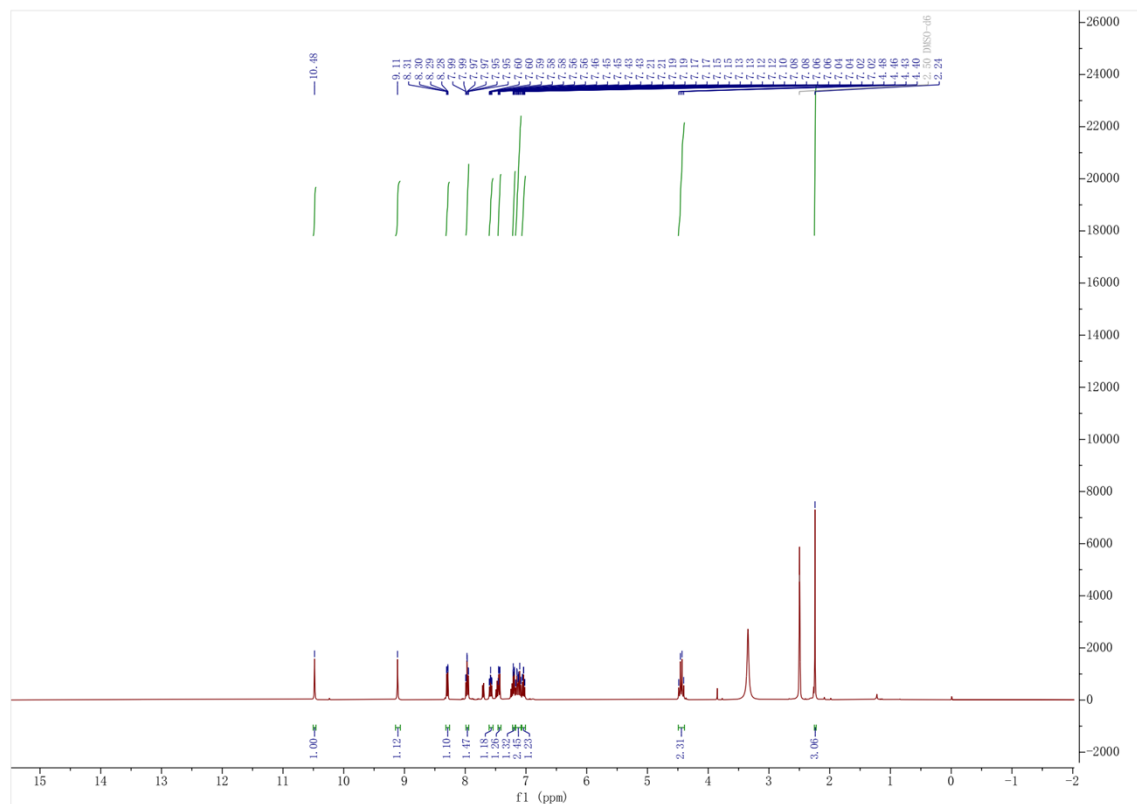



$^{13}\text{C}$  NMR (100 MHz,  $\text{DMSO-}d_6$ ) of **4am**

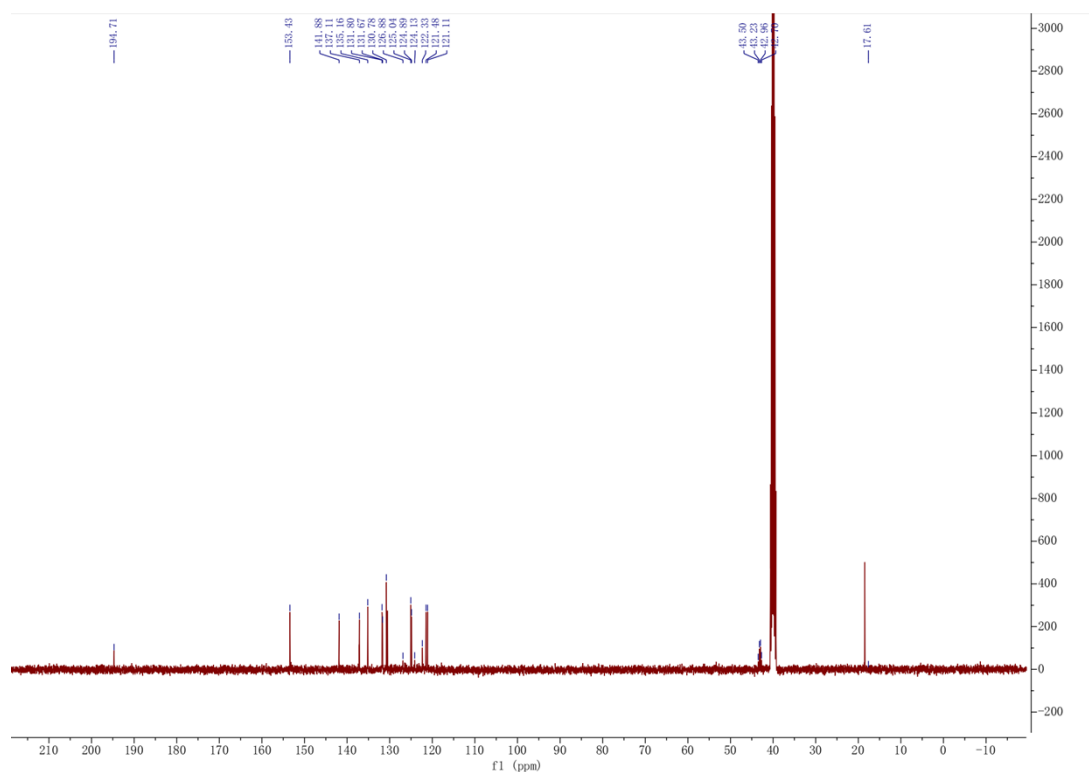

$^{19}\text{F}$  NMR (376 MHz,  $\text{DMSO-}d_6$ ) of **4am**

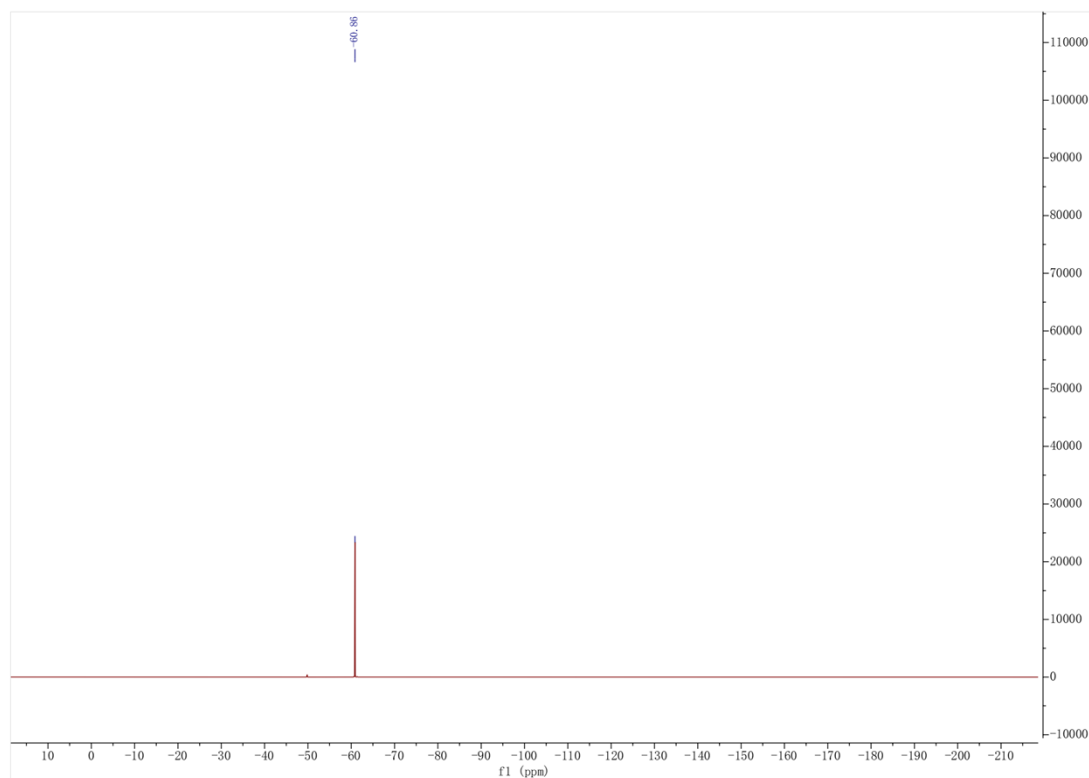

<sup>1</sup>H NMR (400 MHz, DMSO-d<sub>6</sub>) of **4an**

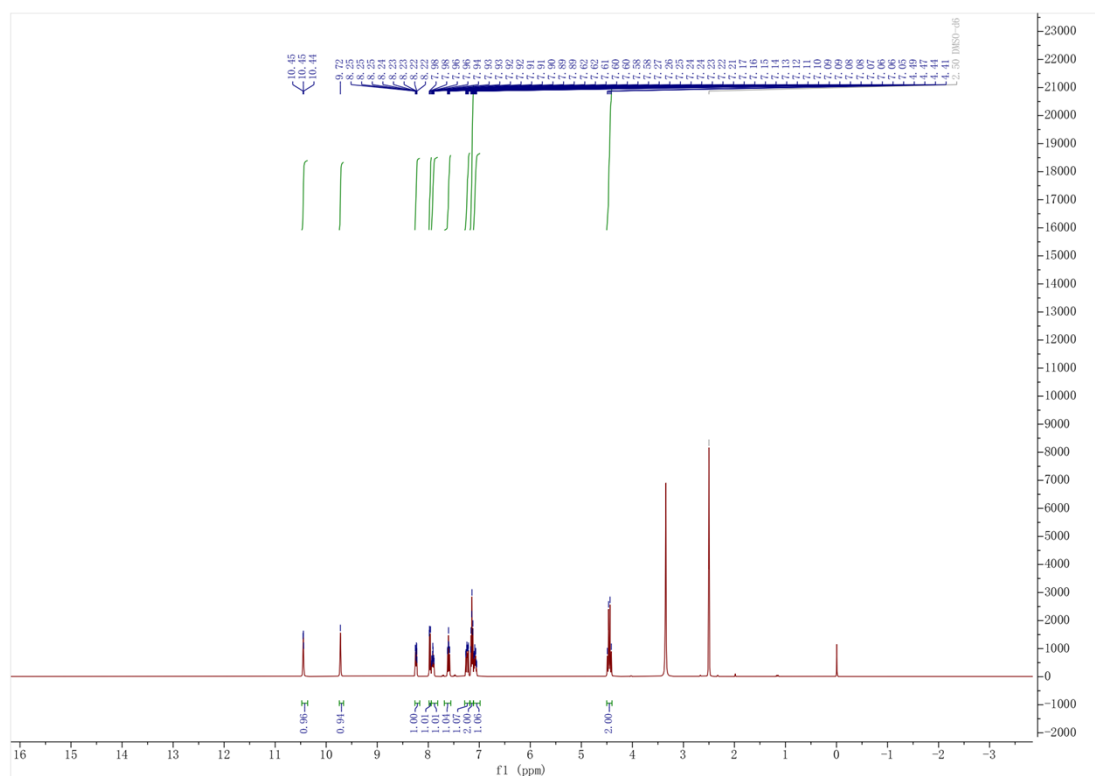

<sup>13</sup>C NMR (100 MHz, DMSO-d<sub>6</sub>) of **4an**

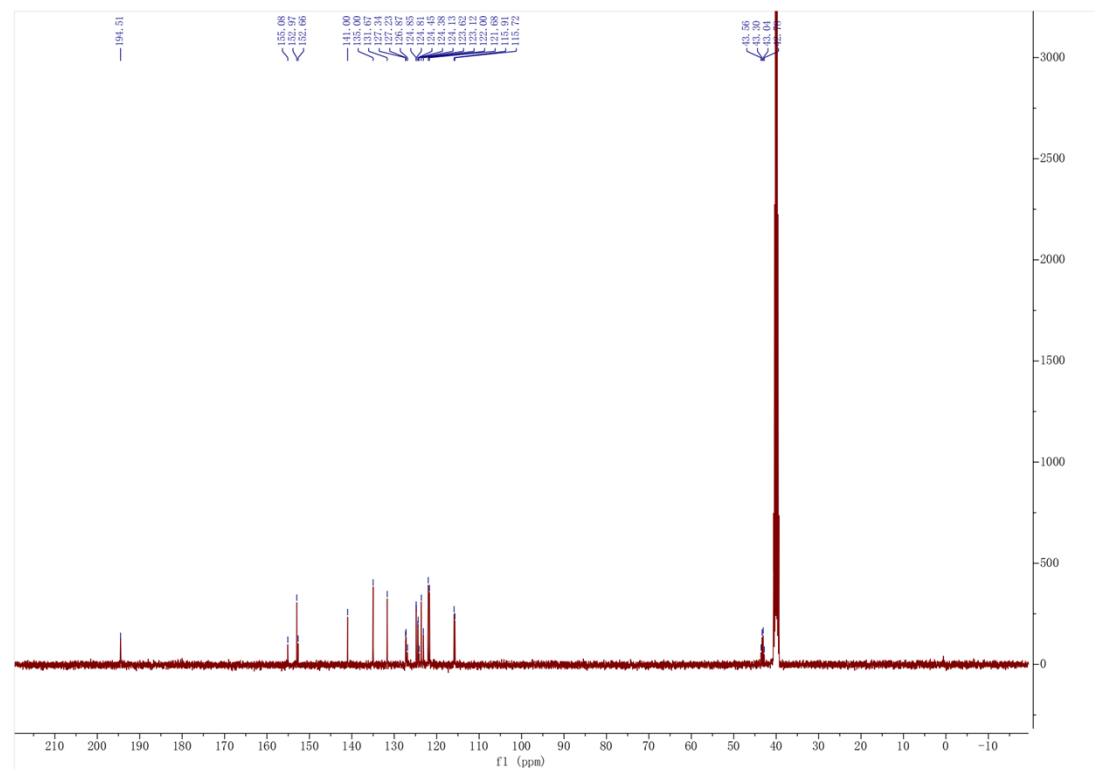

$^{19}\text{F}$  NMR (376 MHz,  $\text{DMSO-}d_6$ ) of **4an**

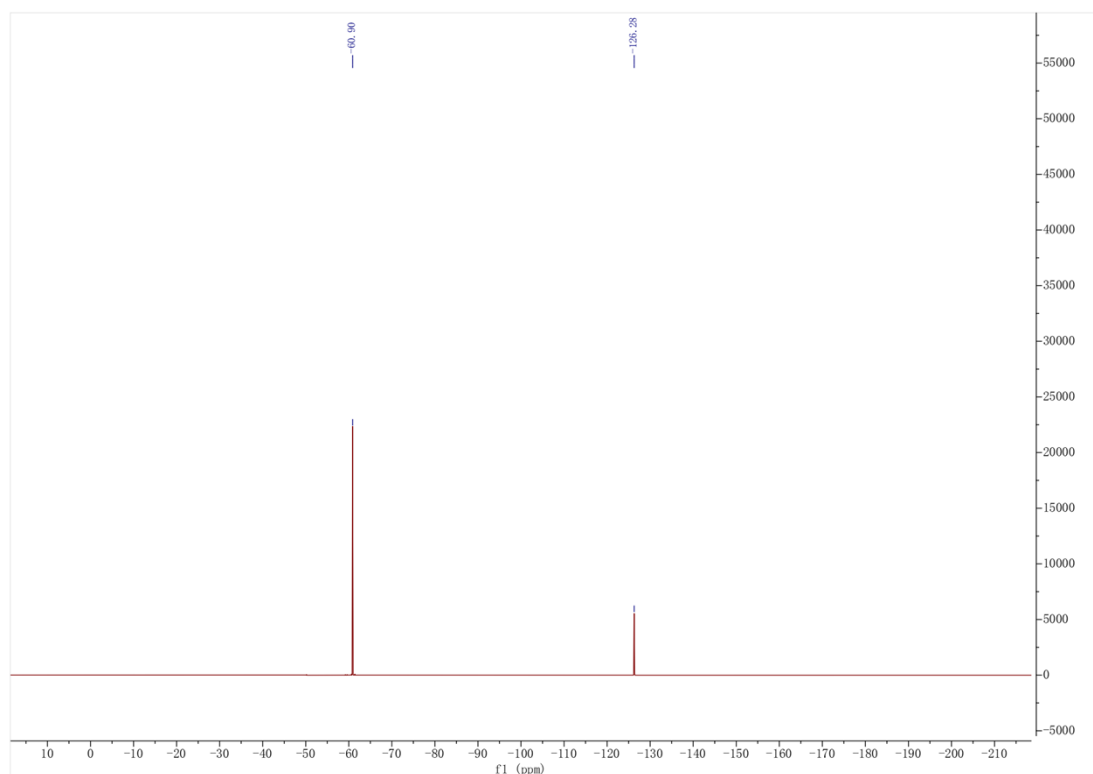

$^1\text{H}$  NMR (400 MHz,  $\text{DMSO-}d_6$ ) of **4ao**

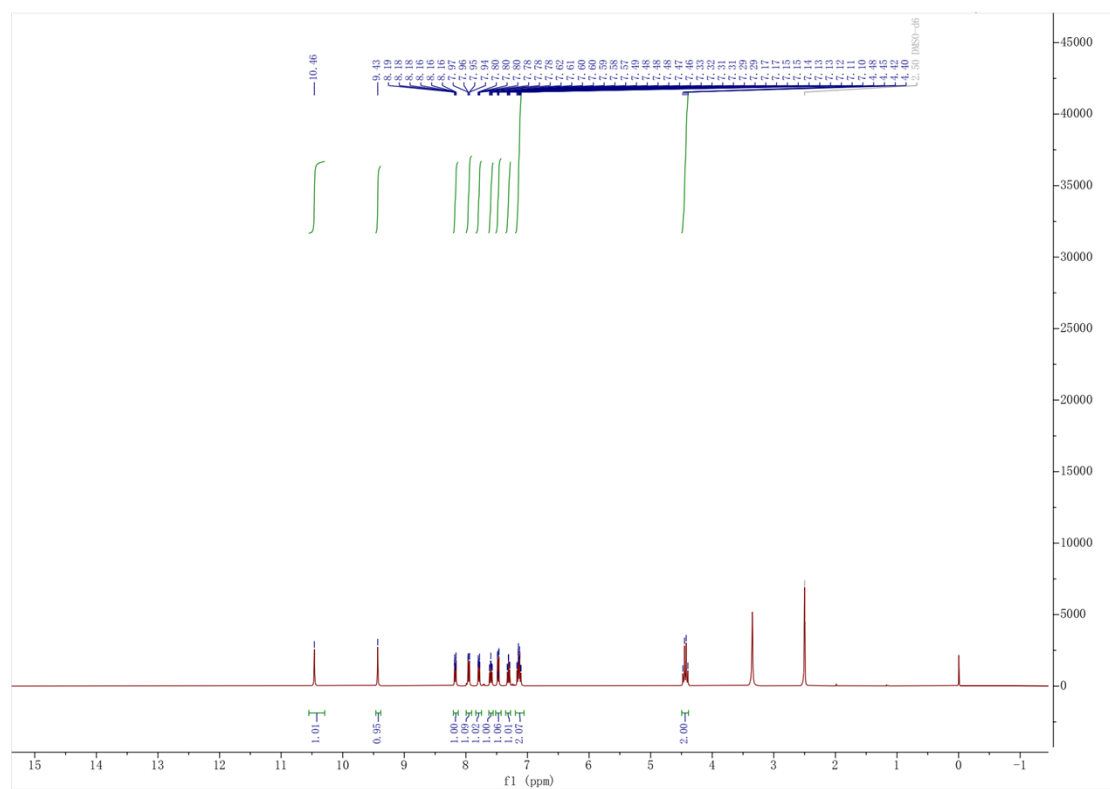

$^{13}\text{C}$  NMR (100 MHz,  $\text{DMSO-}d_6$ ) of **4ao**

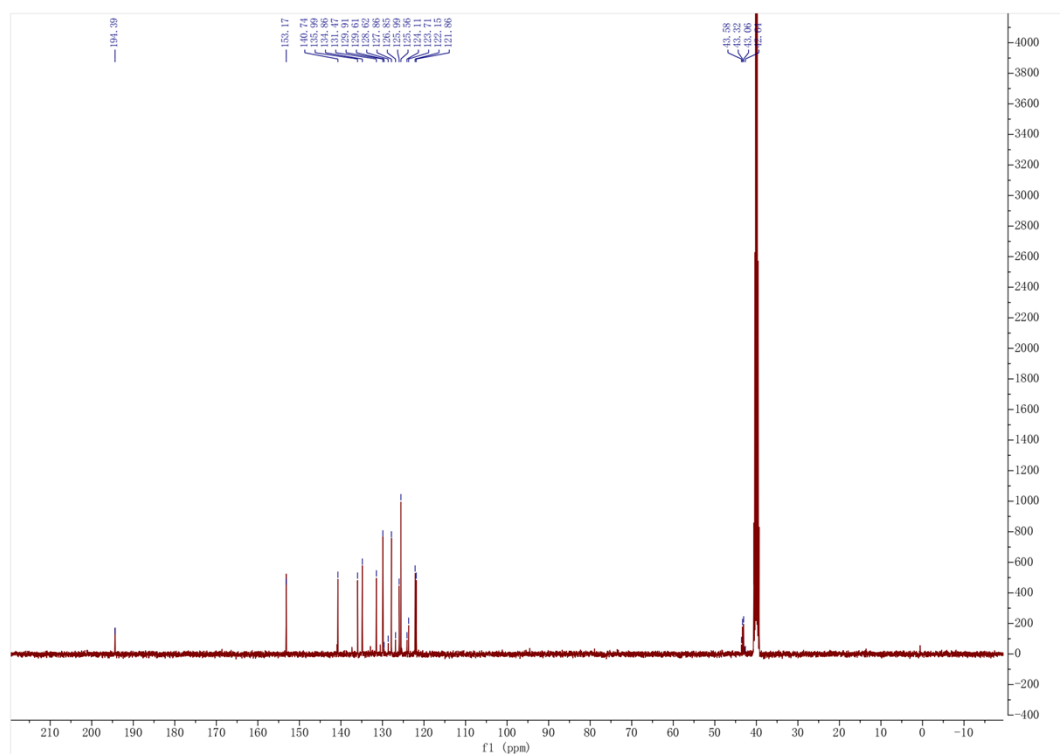

$^{19}\text{F}$  NMR (376 MHz,  $\text{DMSO-}d_6$ ) of **4ao**

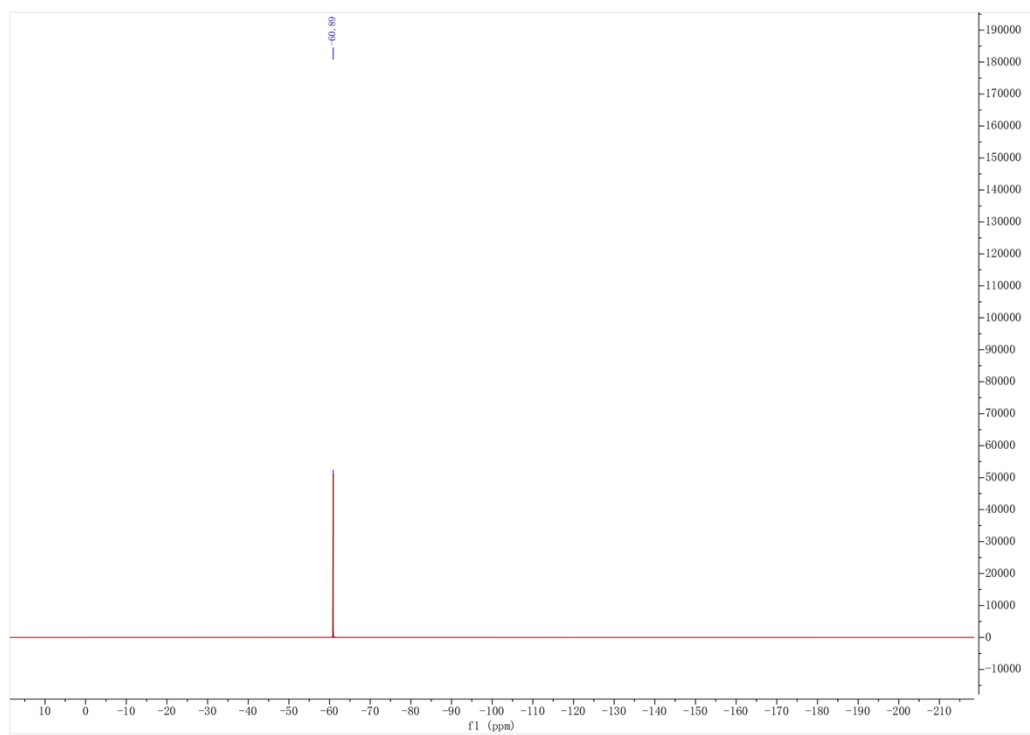



$^{19}\text{F}$  NMR (378 MHz,  $\text{DMSO}-d_6$ ) of **4at**

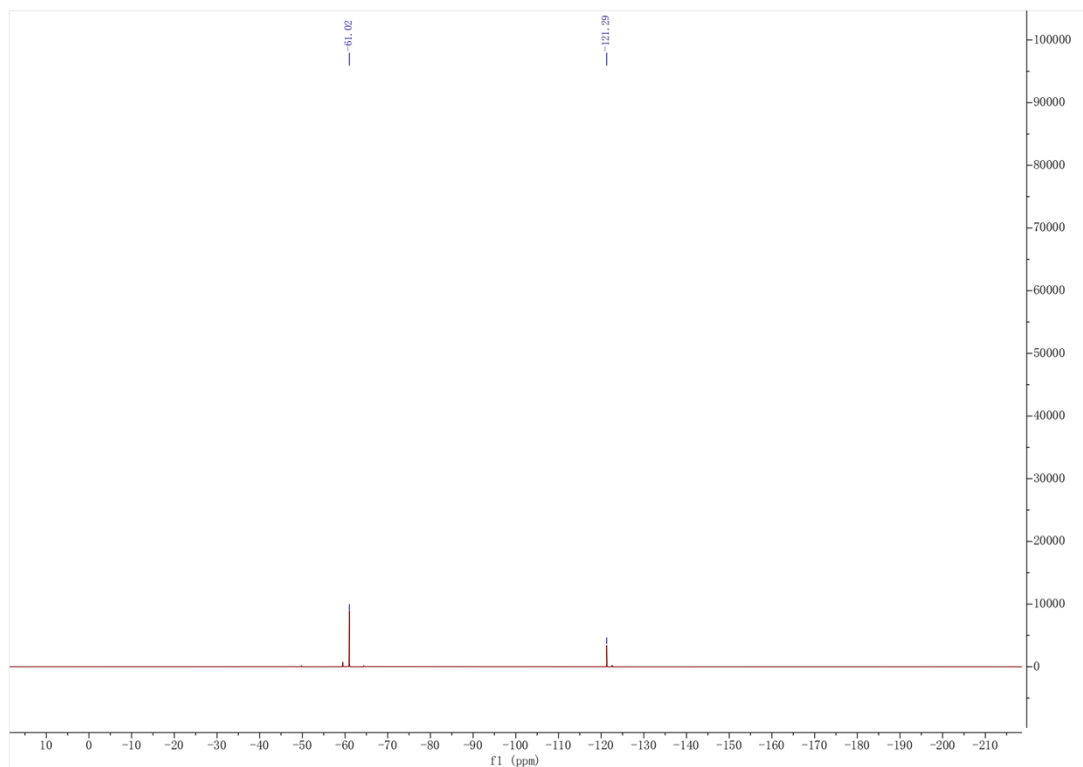

$^1\text{H}$  NMR (400 MHz,  $\text{DMSO}-d_6$ ) of **4au**

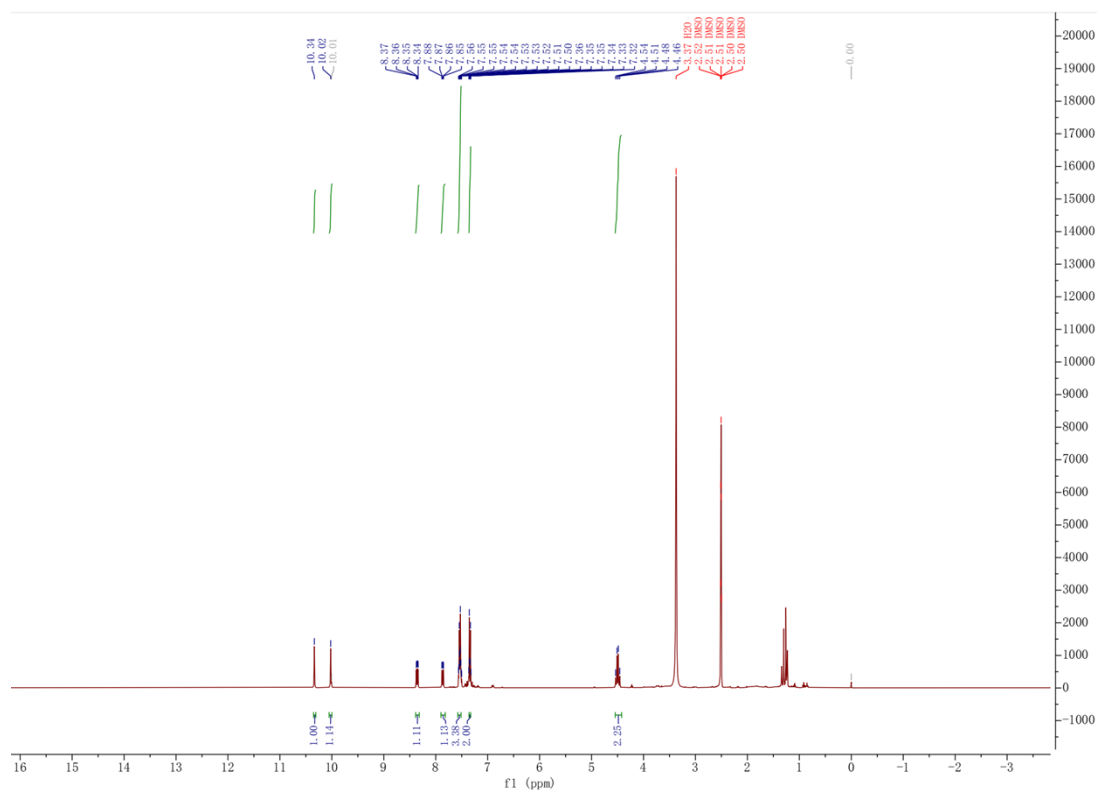

$^{13}\text{C}$  NMR (100 MHz,  $\text{DMSO-}d_6$ ) of **4au**

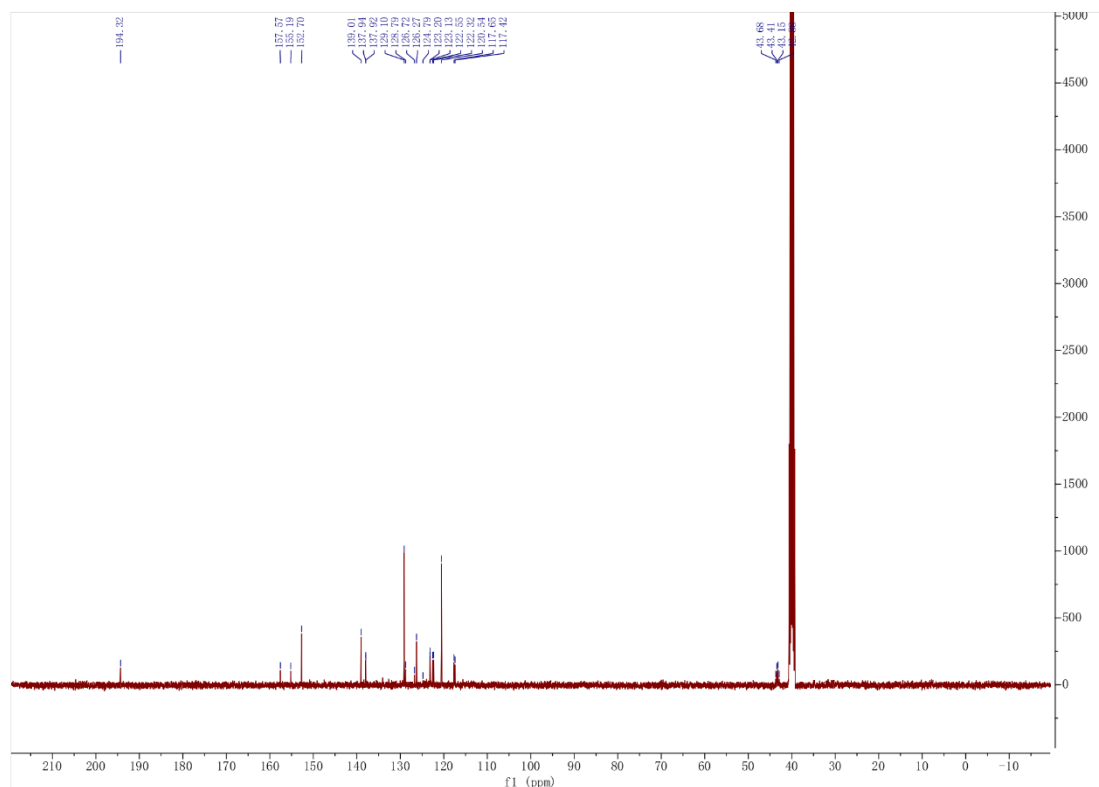

$^{19}\text{F}$  NMR (378 MHz,  $\text{DMSO-}d_6$ ) of **4au**

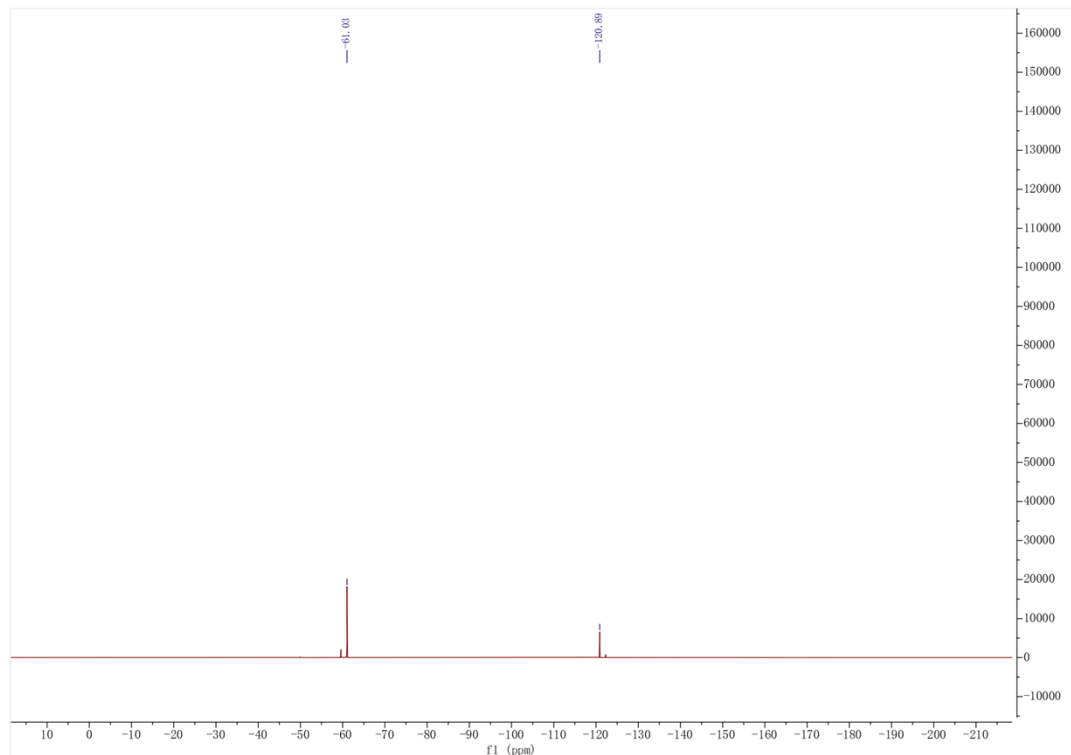

$^1\text{H}$  NMR (400 MHz,  $\text{DMSO-}d_6$ ) of **4av**

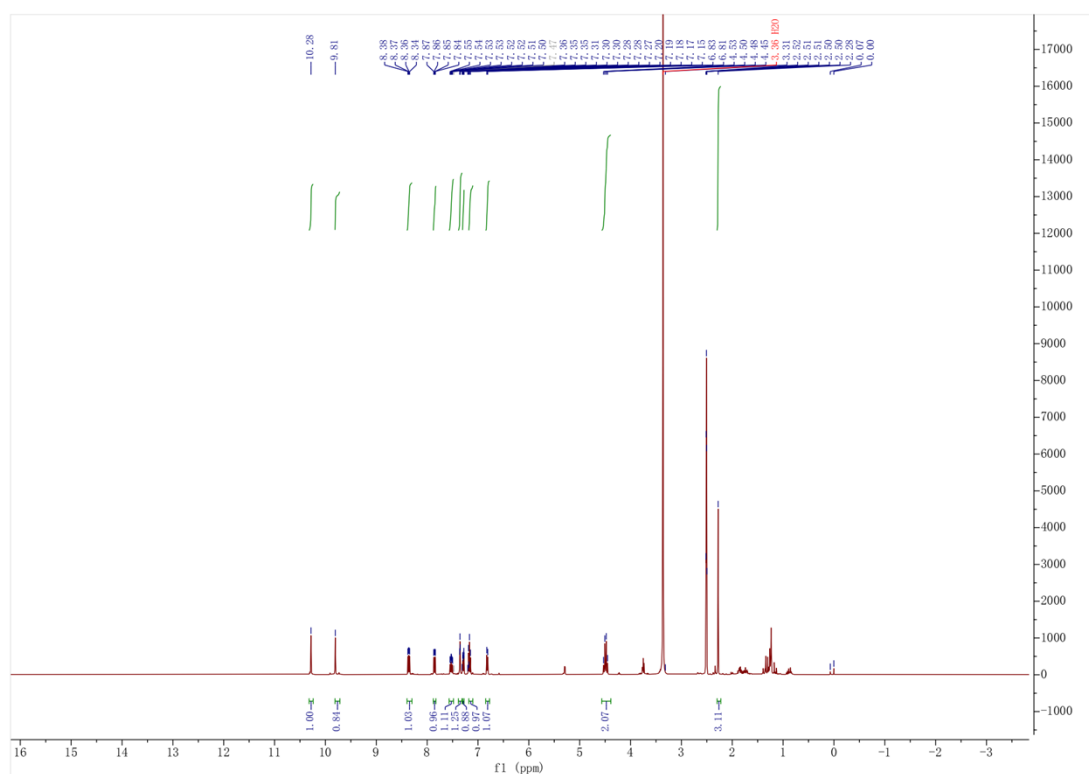

$^{13}\text{C}$  NMR (150 MHz,  $\text{DMSO-}d_6$ ) of **4av**

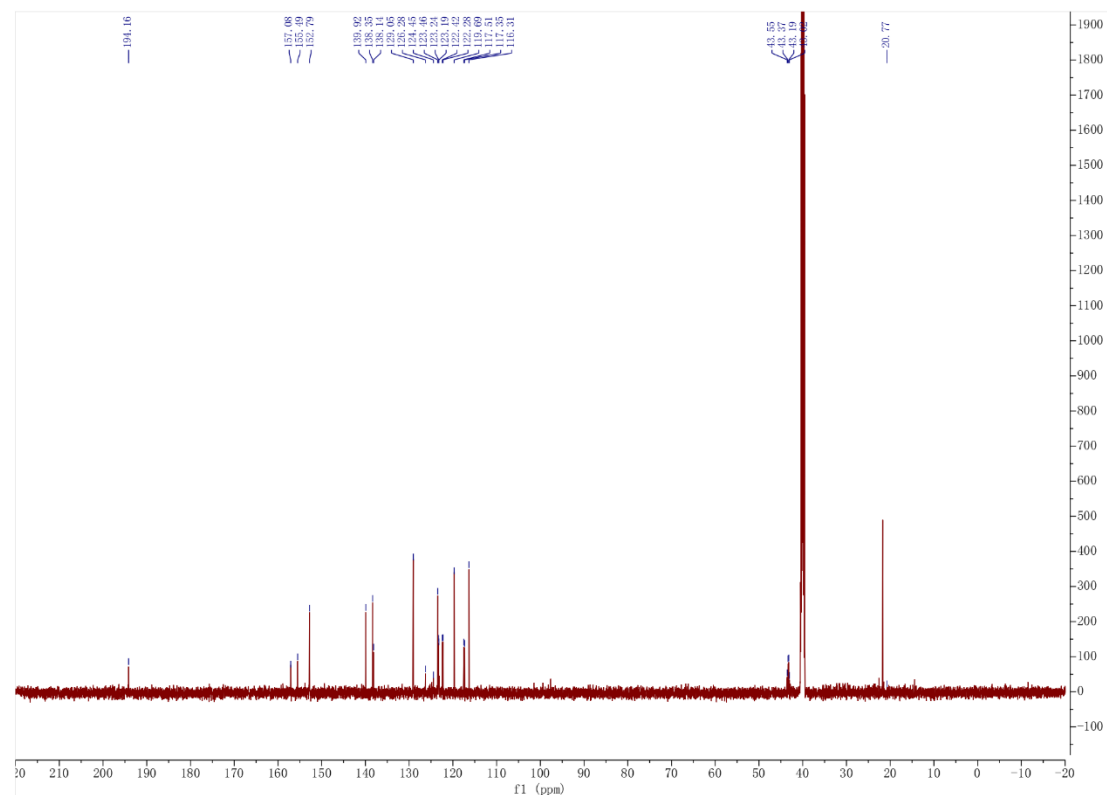





$^{13}\text{C}$  NMR (100 MHz,  $\text{DMSO-}d_6$ ) of **4aw**

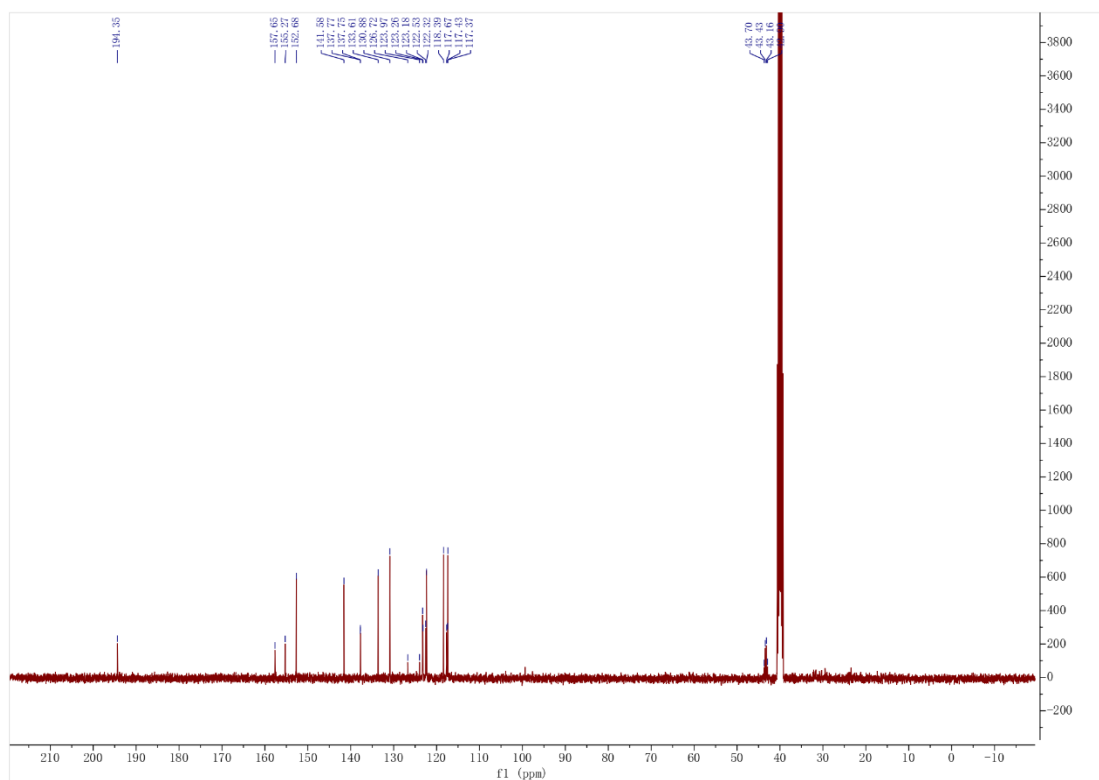

$^{19}\text{F}$  NMR (378 MHz,  $\text{DMSO-}d_6$ ) of **4aw**

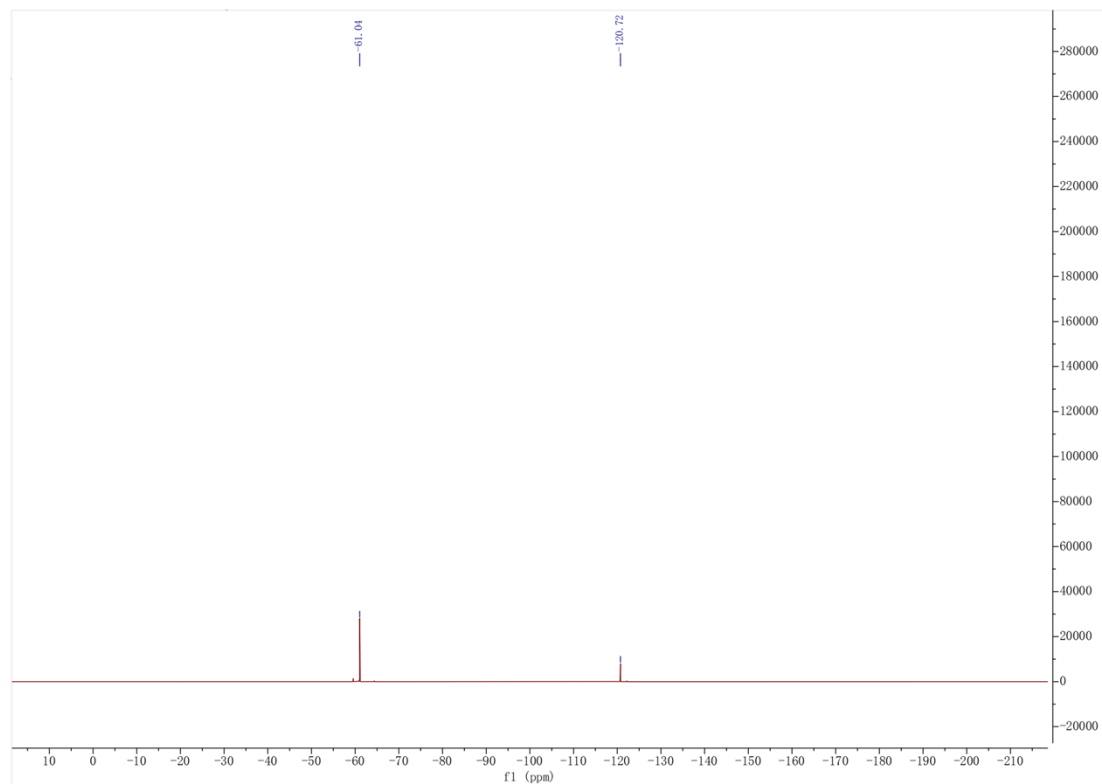

<sup>1</sup>H NMR (400 MHz, DMSO-d<sub>6</sub>) of **6aa**

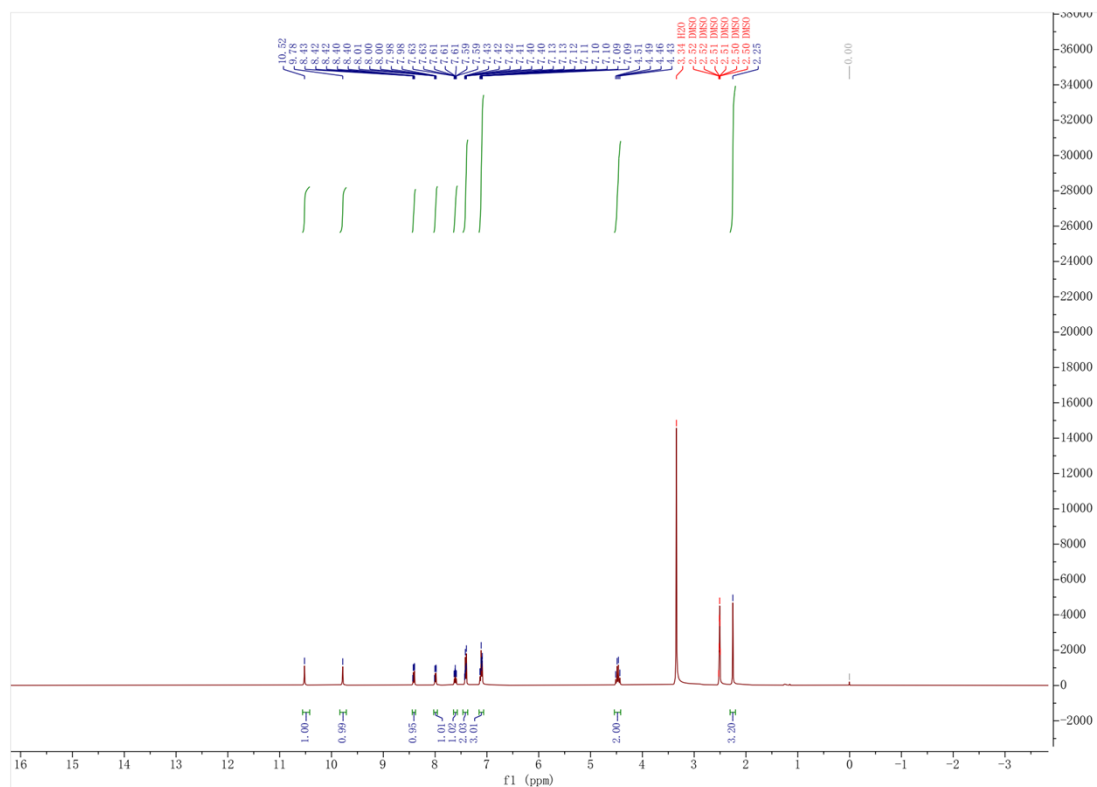

<sup>13</sup>C NMR (100 MHz, DMSO-d<sub>6</sub>) of **6aa**

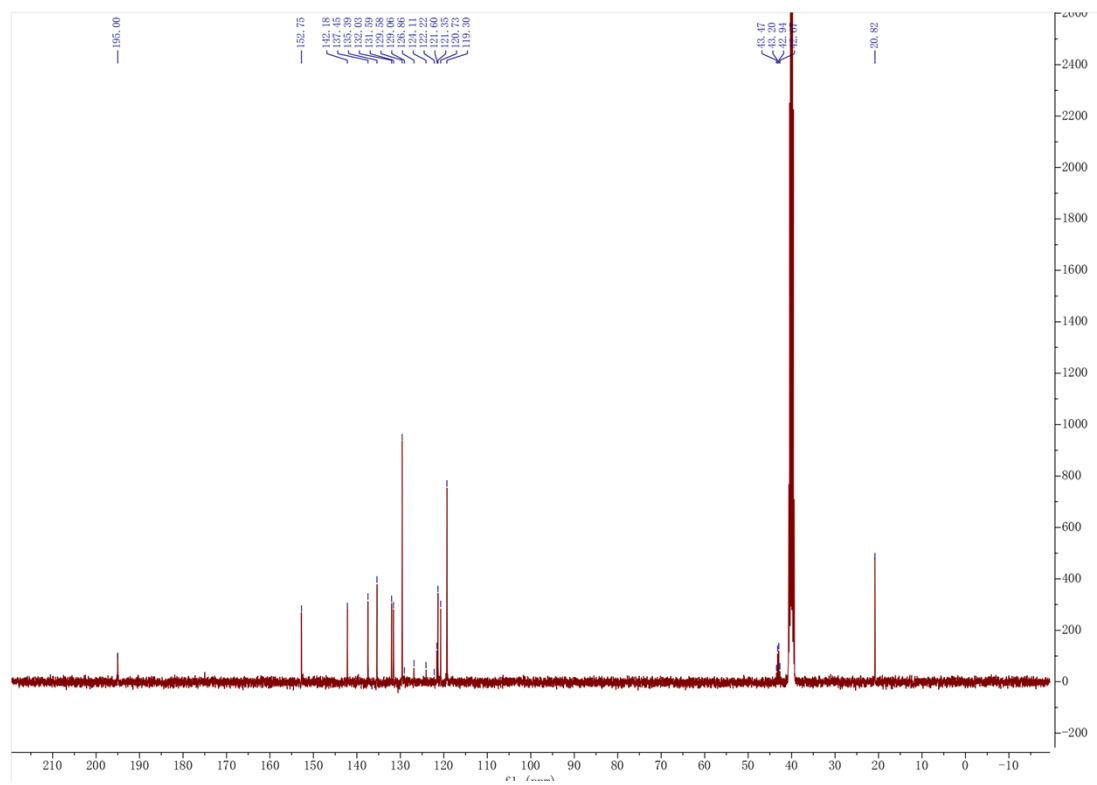

$^{19}\text{F}$  NMR (376 MHz,  $\text{DMSO-}d_6$ ) of **6aa**

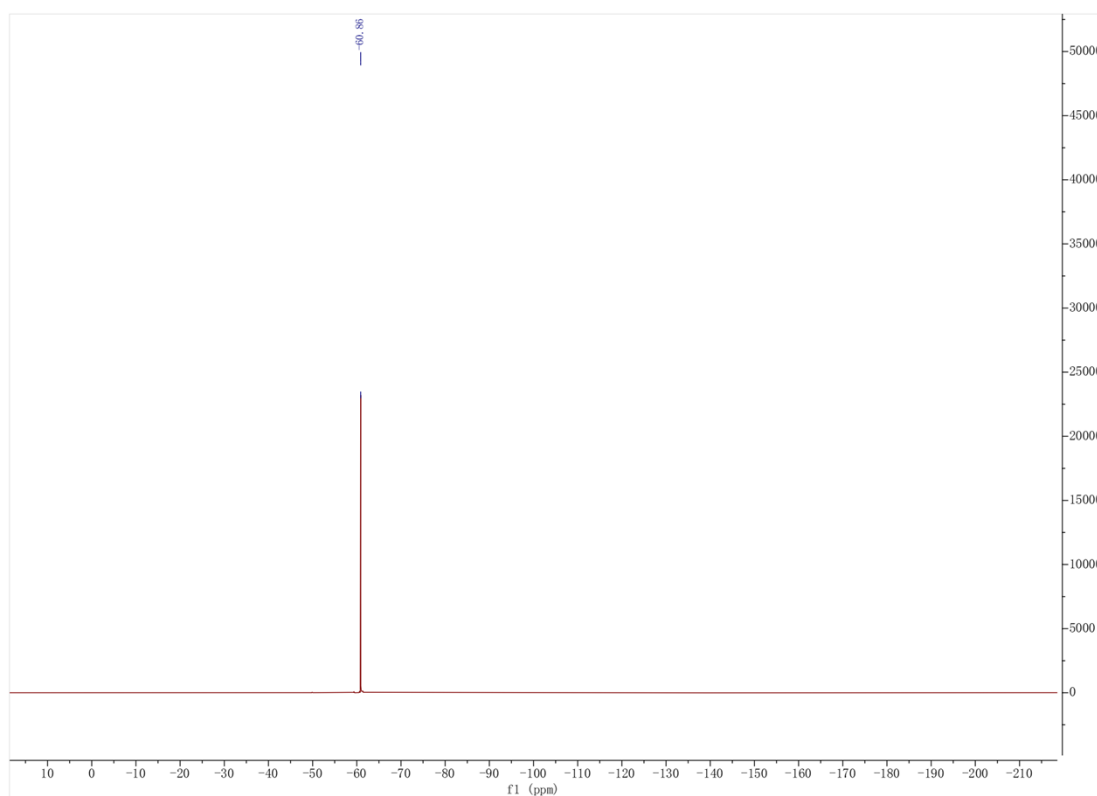

$^1\text{H}$  NMR (400 MHz,  $\text{DMSO-}d_6$ ) of **6ab**

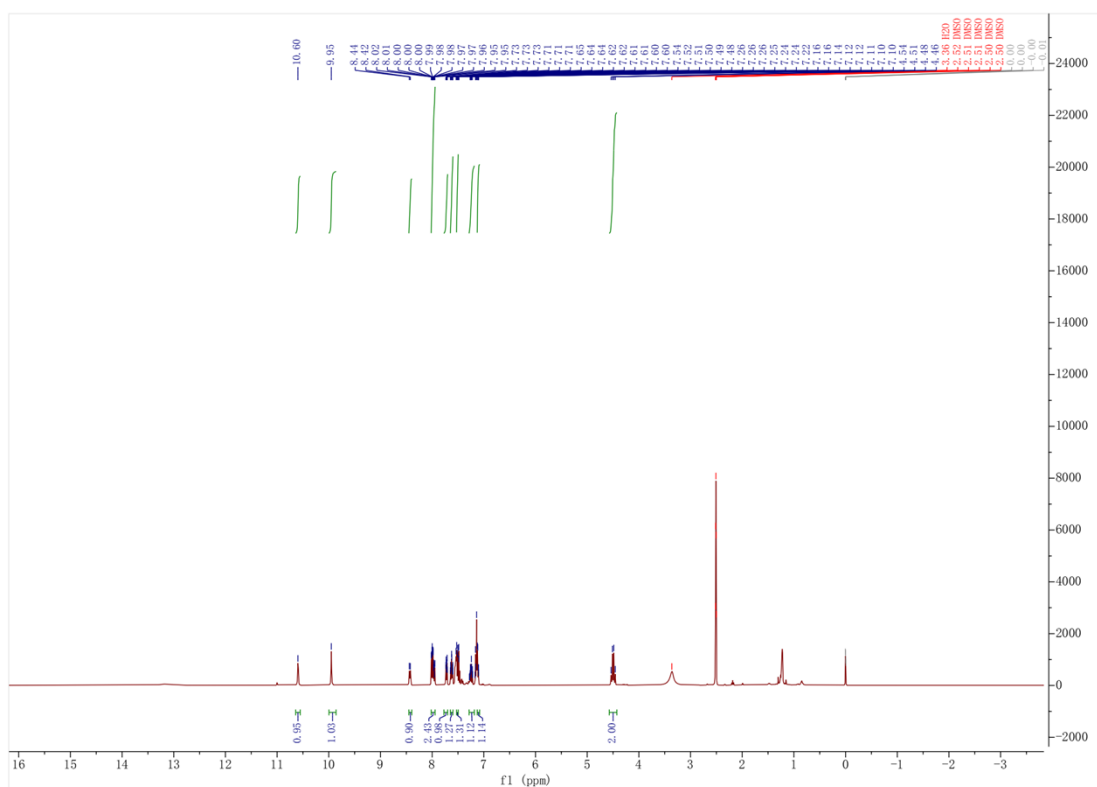

$^{13}\text{C}$  NMR (100 MHz,  $\text{DMSO-}d_6$ ) of **6ab**

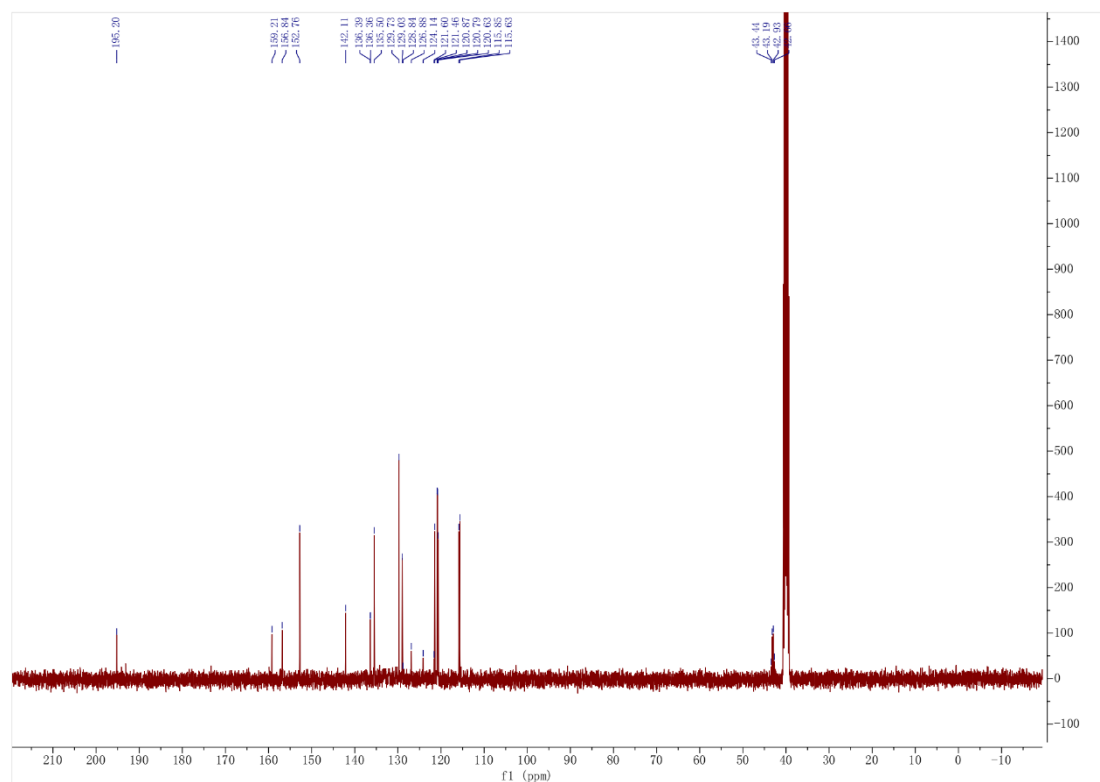

$^{19}\text{F}$  NMR (376 MHz,  $\text{DMSO-}d_6$ ) of **6ab**

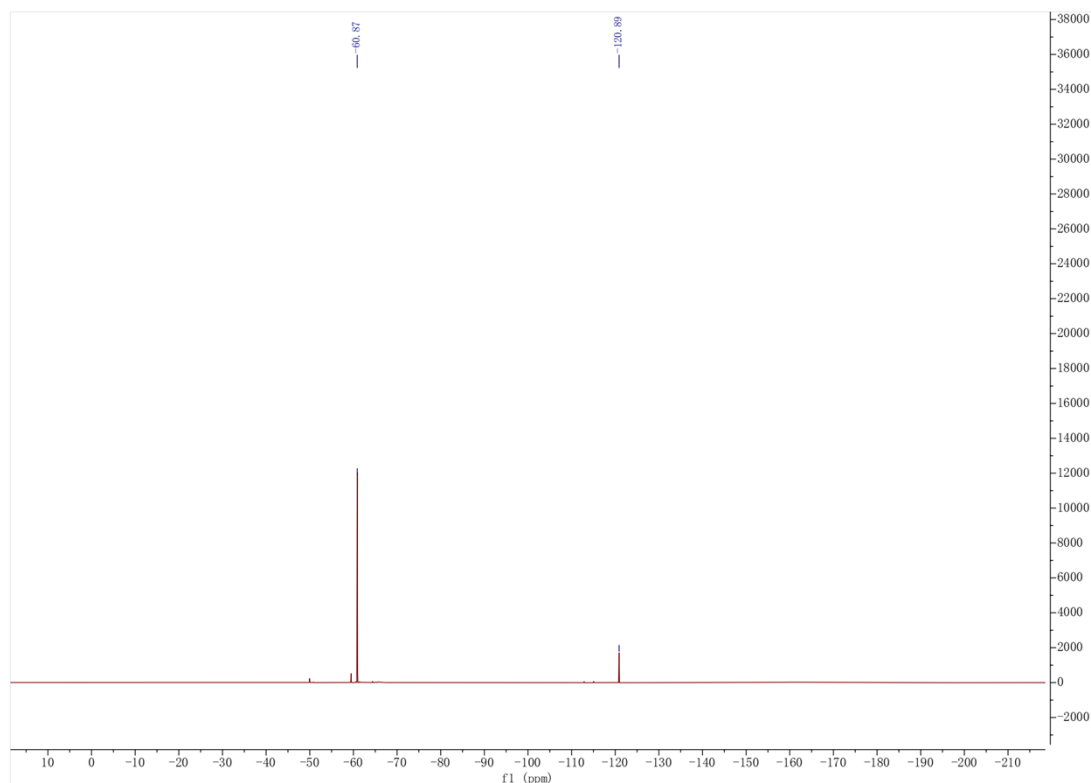

<sup>1</sup>H NMR (400 MHz, DMSO-*d*<sub>6</sub>) of 6ac

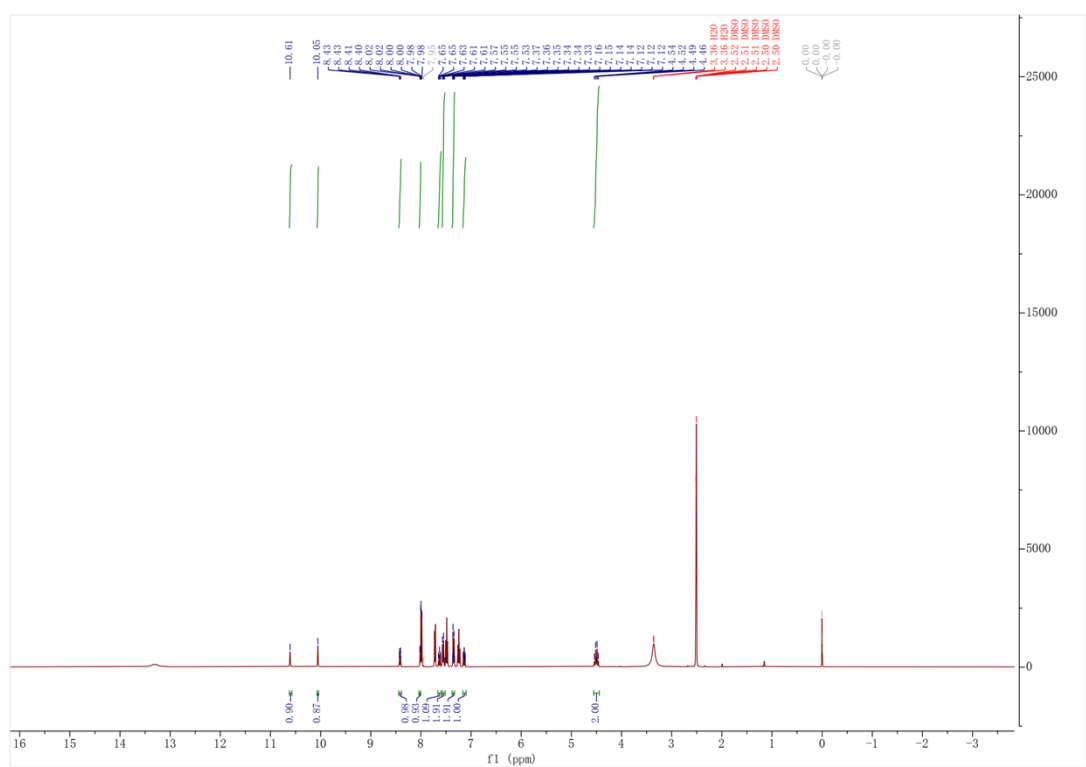

<sup>13</sup>C NMR (100 MHz, DMSO-*d*<sub>6</sub>) of 6ac

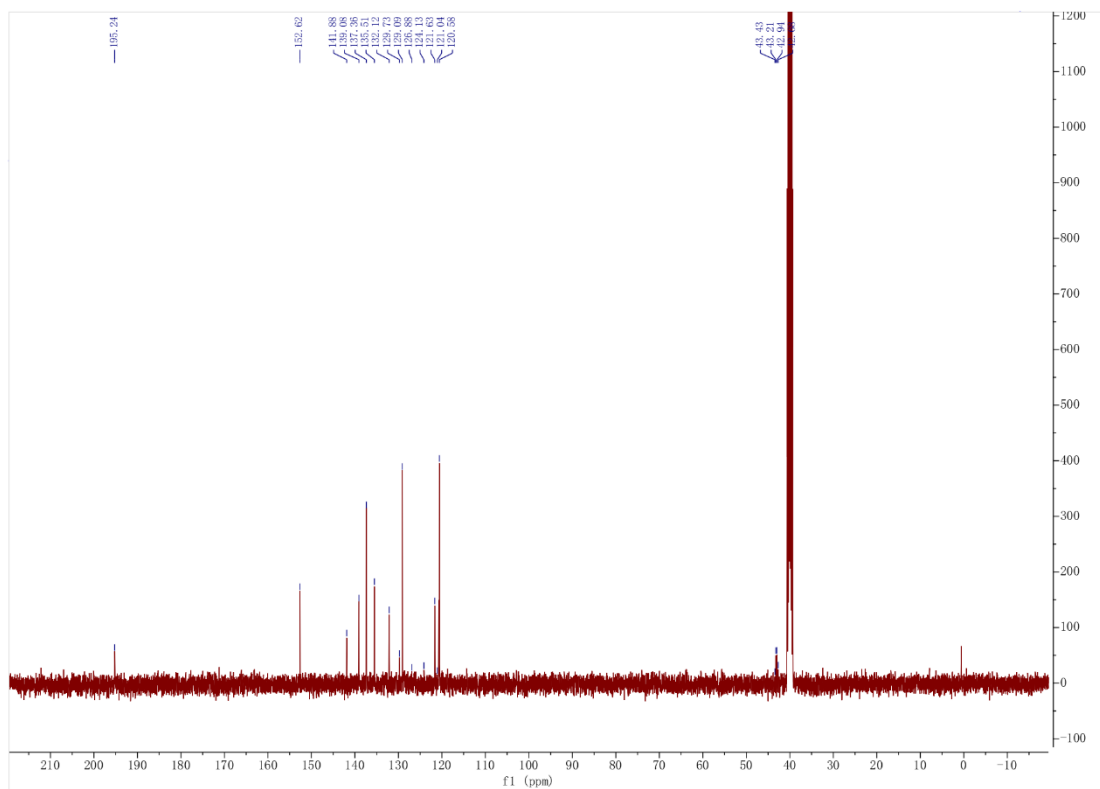

$^{19}\text{F}$  NMR (376 MHz,  $\text{DMSO-}d_6$ ) of **6ac**

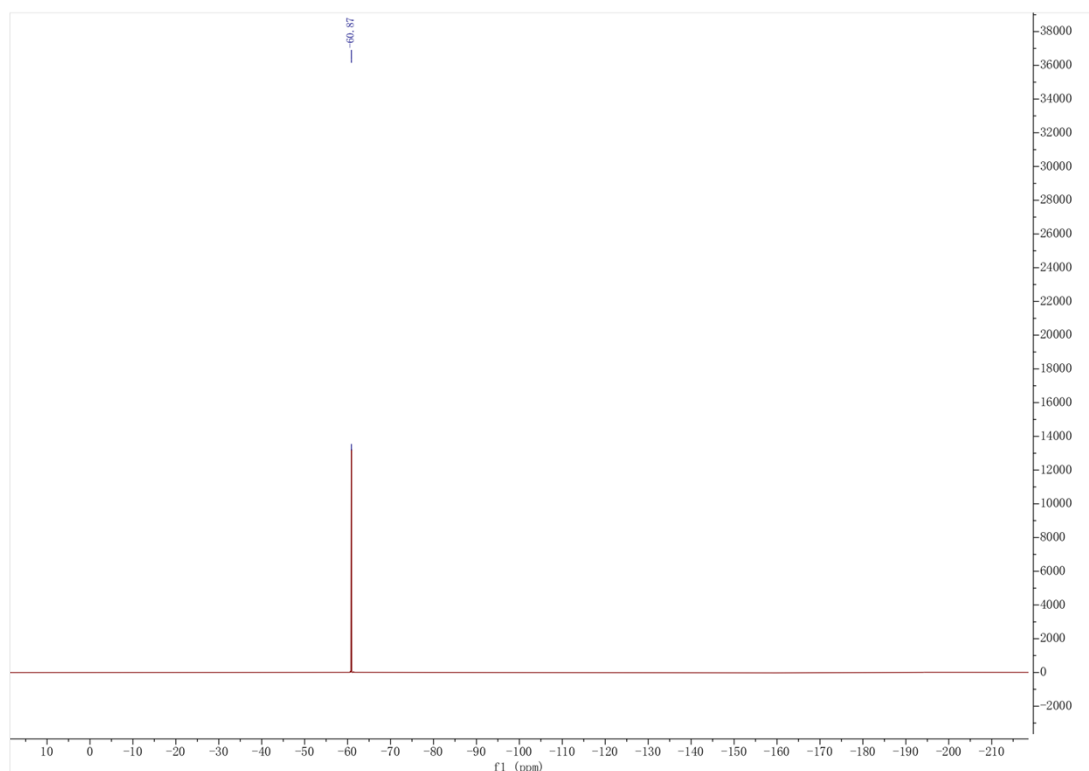

$^1\text{H}$  NMR (400 MHz,  $\text{DMSO-}d_6$ ) of **6ad**

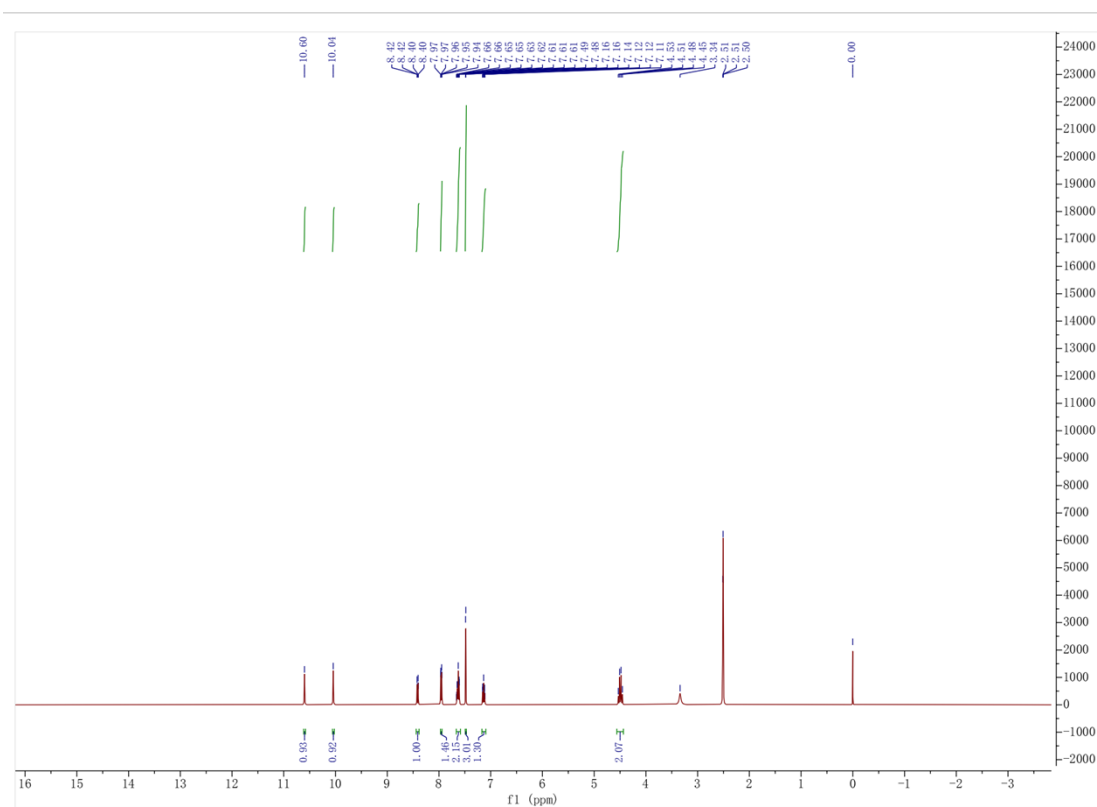

$^{13}\text{C}$  NMR (100 MHz,  $\text{DMSO-}d_6$ ) of **6ad**

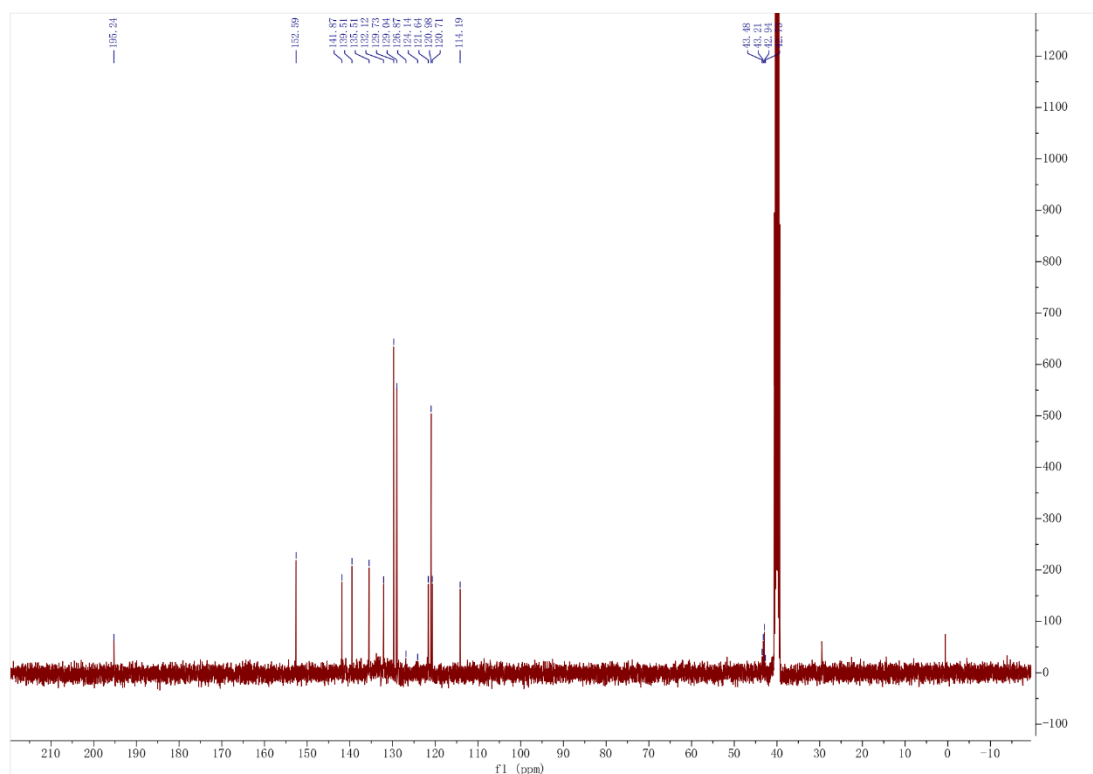

$^{19}\text{F}$  NMR (376 MHz,  $\text{DMSO-}d_6$ ) of **6ad**

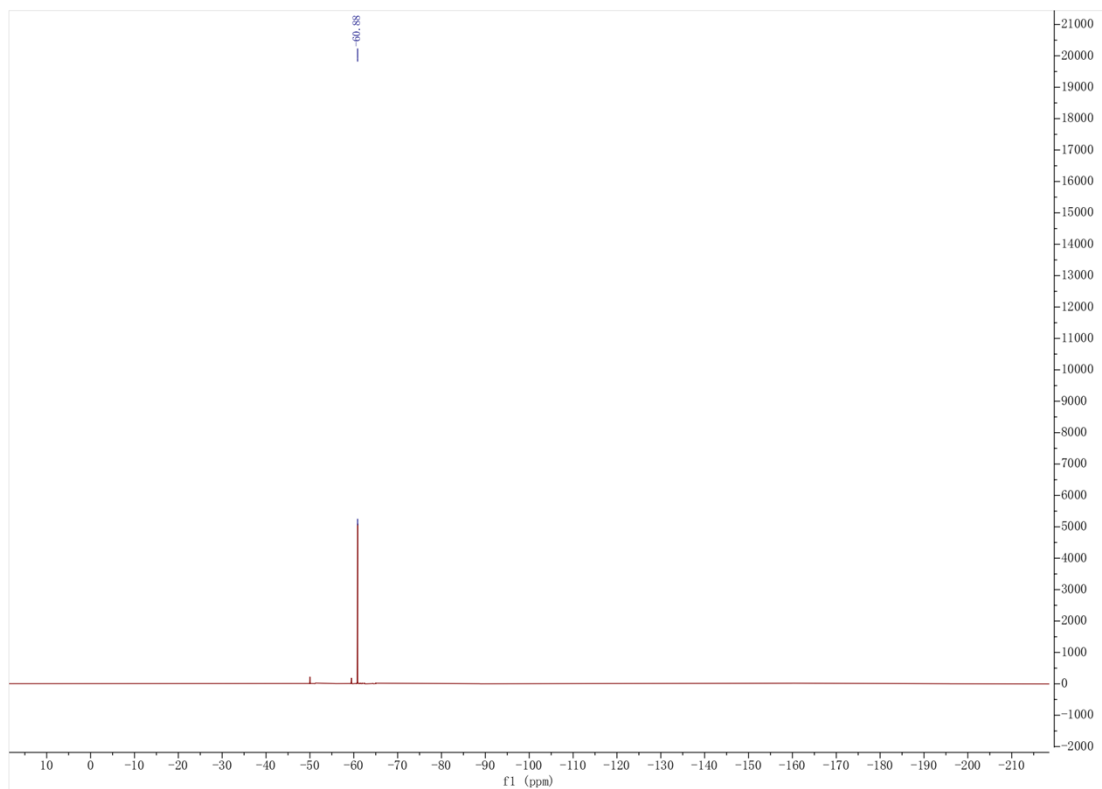



$^1\text{H}$  NMR (400 MHz,  $\text{DMSO}-d_6$ ) of **6ac**

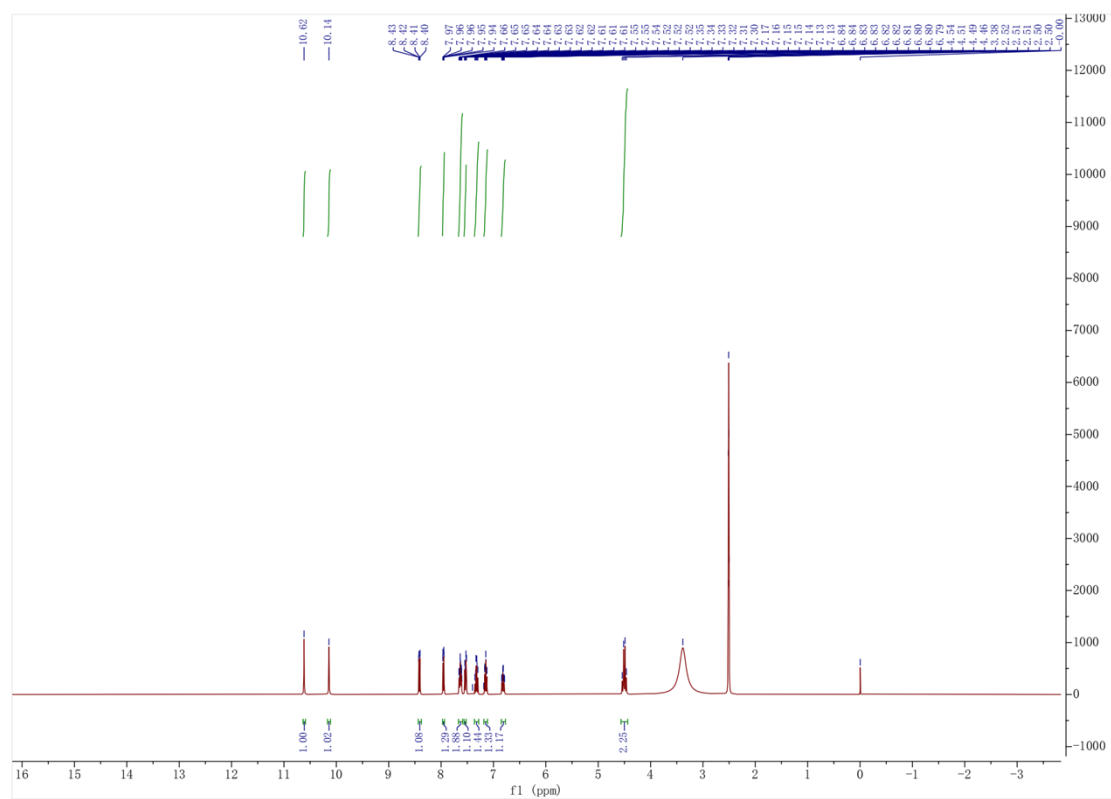

$^{13}\text{C}$  NMR (100 MHz,  $\text{DMSO}-d_6$ ) of **6ac**

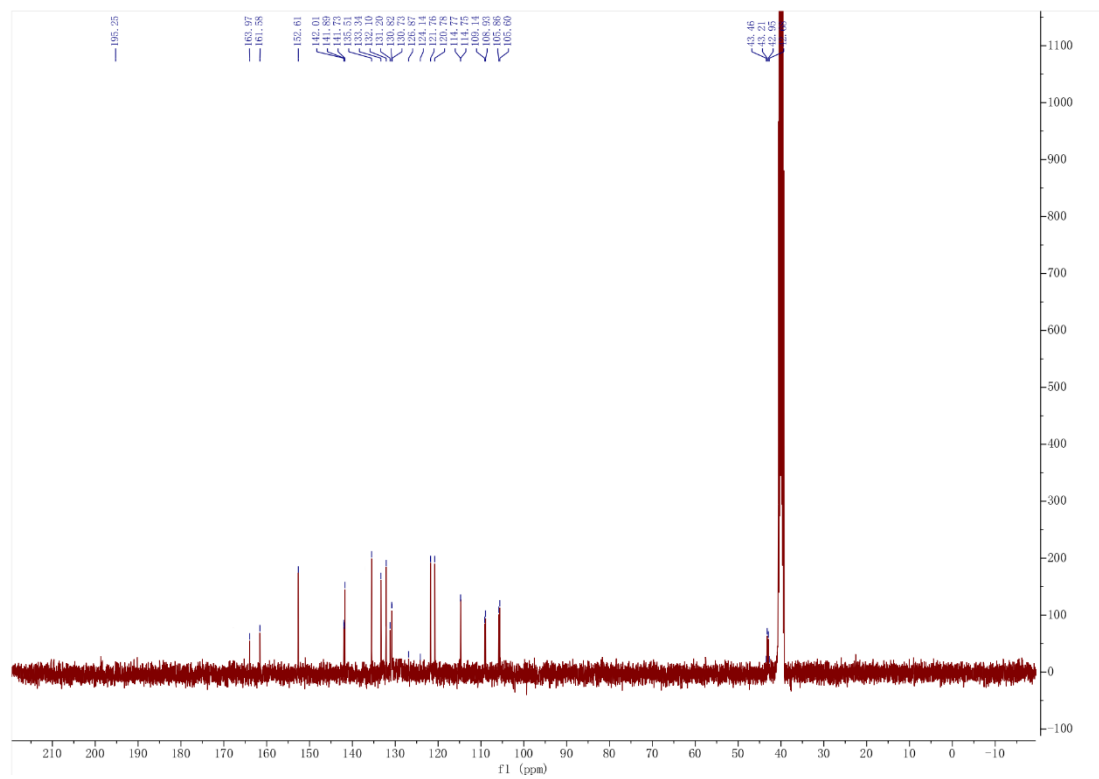

$^{19}\text{F}$  NMR (376 MHz,  $\text{DMSO-}d_6$ ) of **6ae**

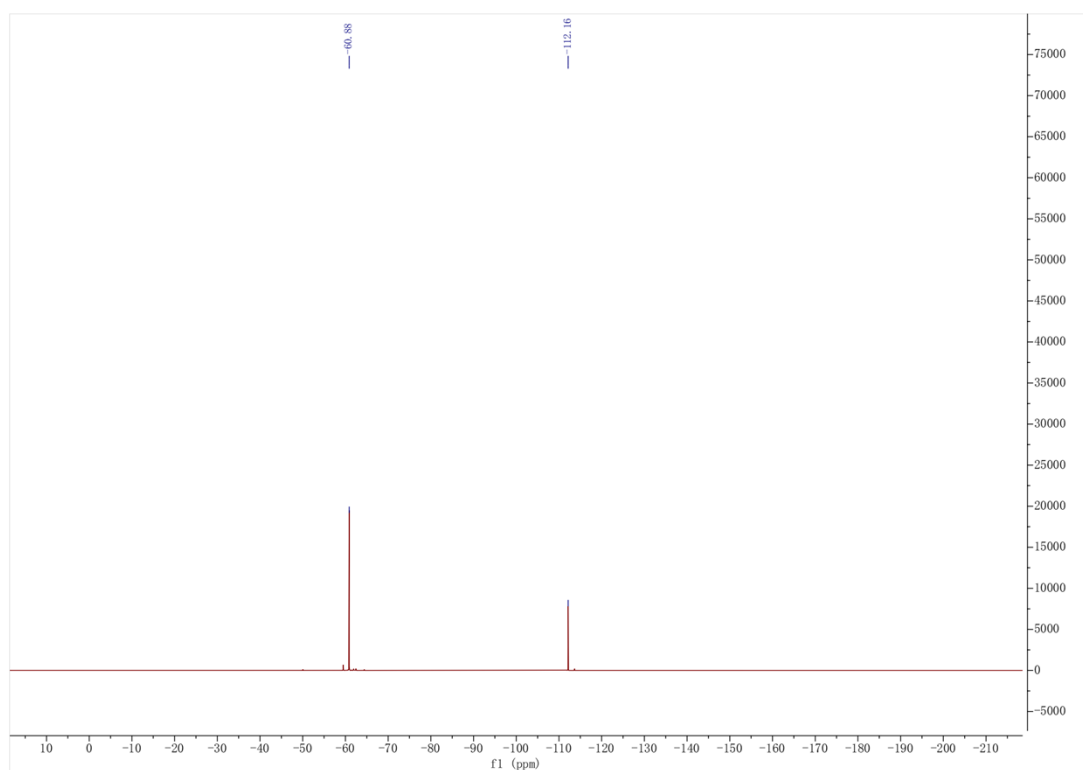

$^1\text{H}$  NMR (400 MHz,  $\text{DMSO-}d_6$ ) of **6af**

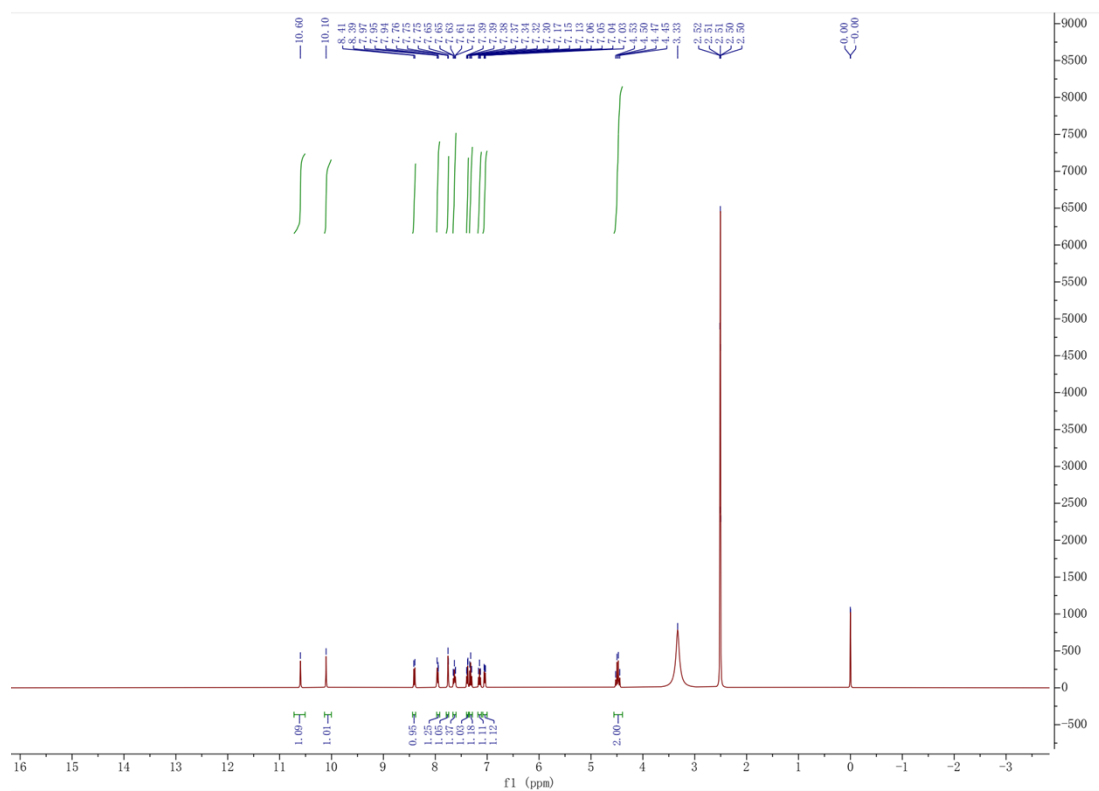

$^{13}\text{C}$  NMR (100 MHz,  $\text{DMSO-}d_6$ ) of **6af**

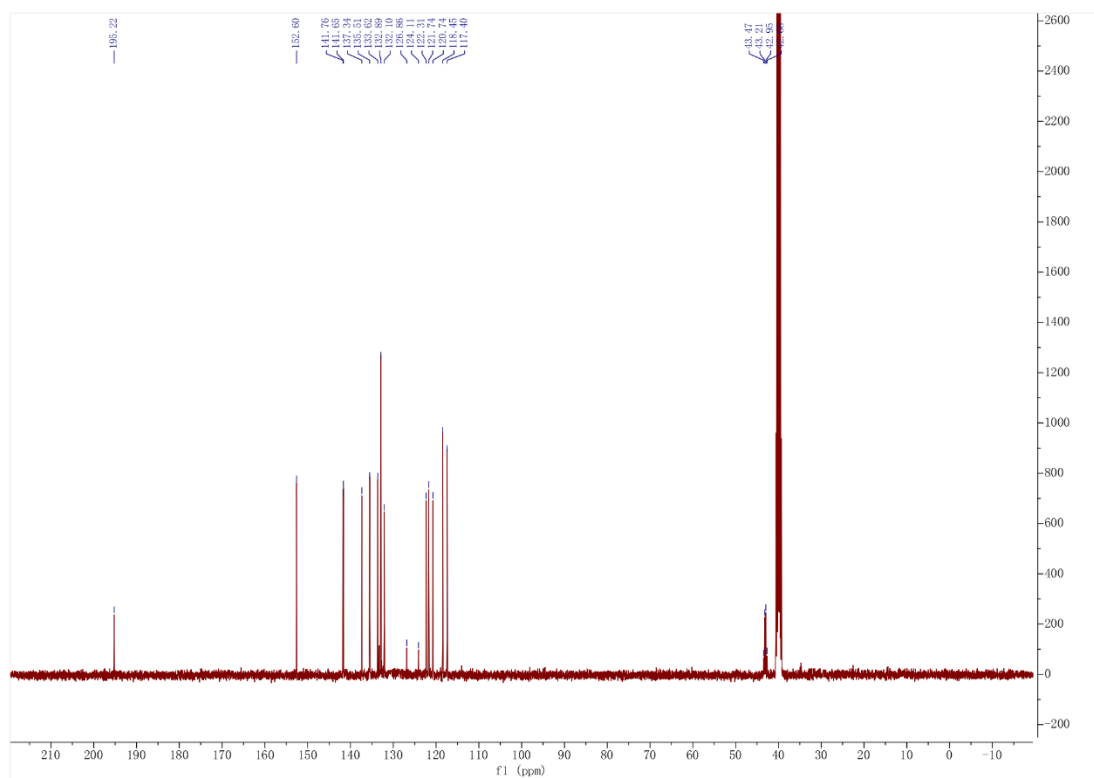

$^{19}\text{F}$  NMR (376 MHz,  $\text{DMSO-}d_6$ ) of **6af**

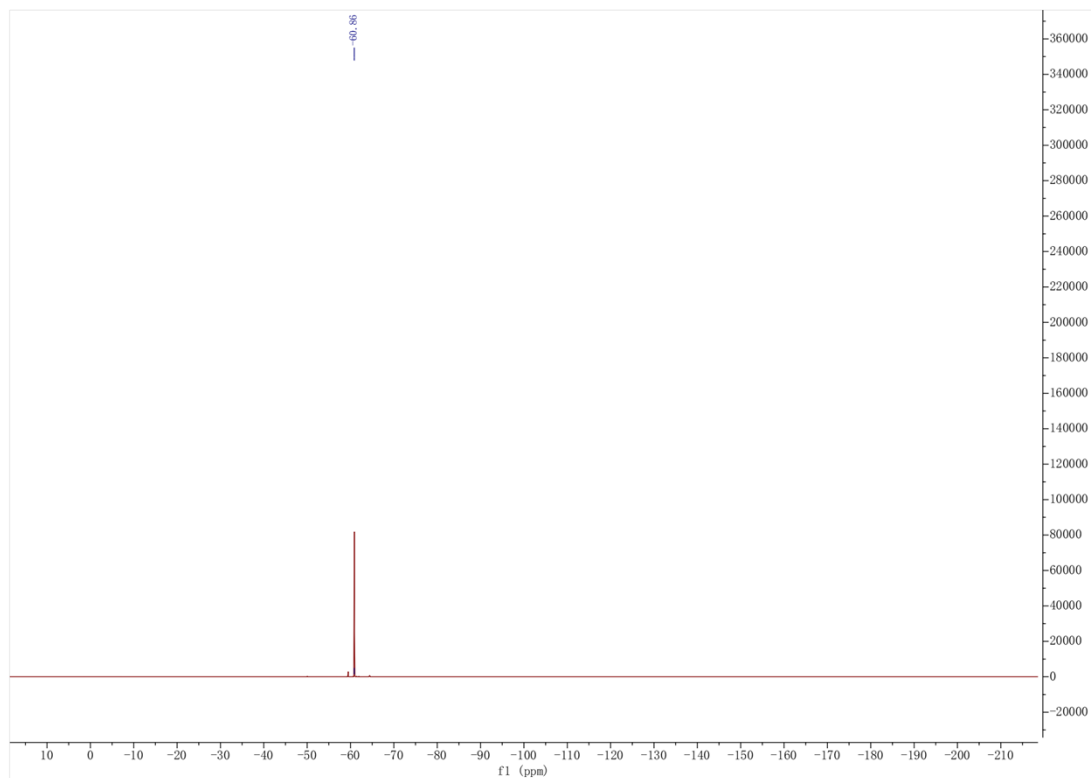

<sup>1</sup>H NMR (400 MHz, DMSO-d<sub>6</sub>) of **6ag**

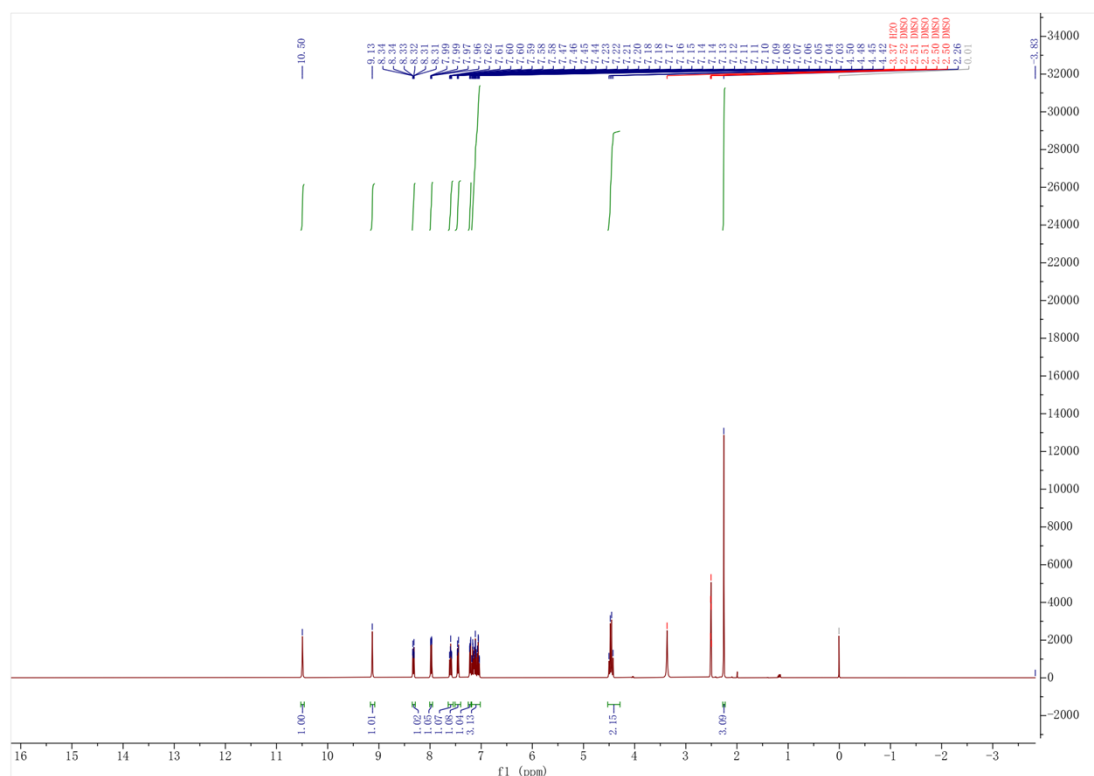

<sup>13</sup>C NMR (100 MHz, DMSO-d<sub>6</sub>) of **6ag**

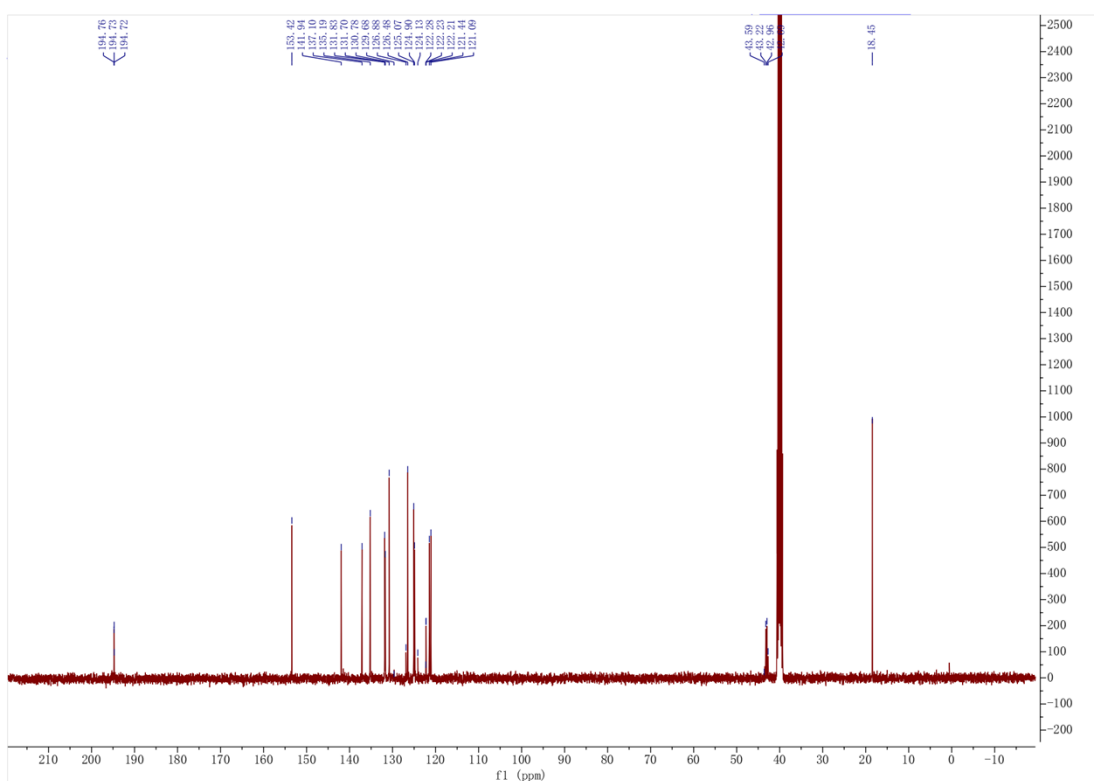

$^{19}\text{F}$  NMR (376 MHz,  $\text{DMSO-}d_6$ ) of **6ag**

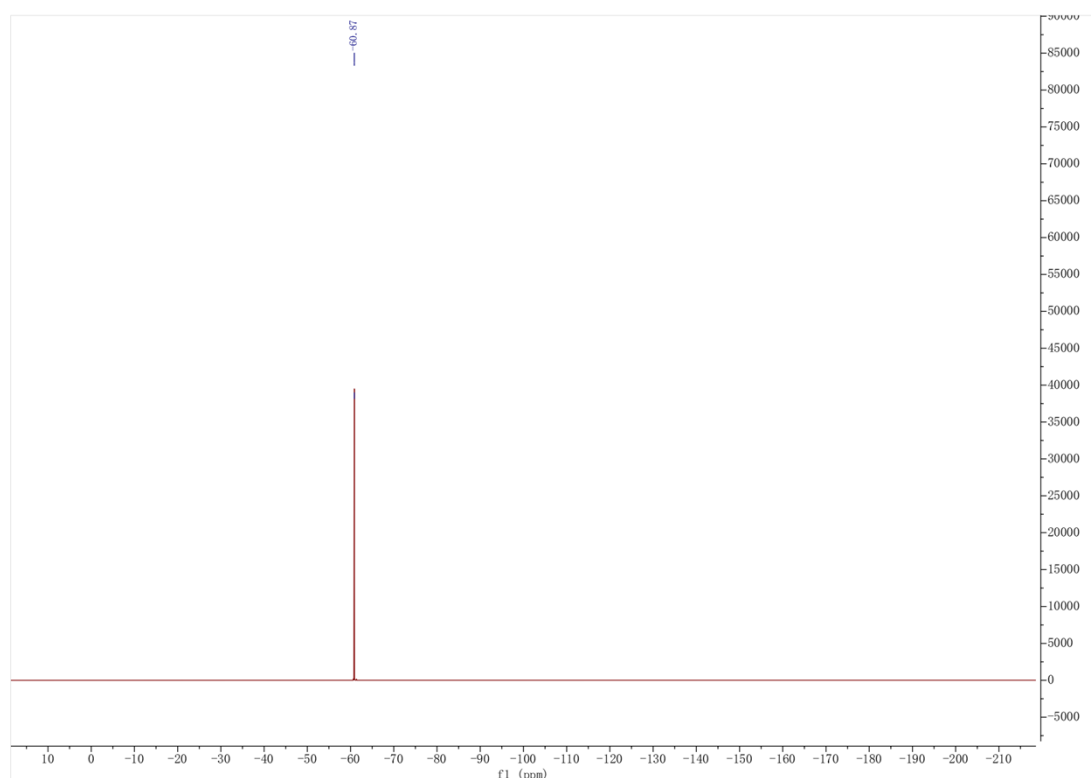

## 6. The Computational Calculations

### 6.1. Computational Details

Density functional theory (DFT) calculations were performed with Gaussian 16.<sup>1</sup> The geometry of each species was optimized using the B3LYP functional<sup>2</sup> and the 6-311G(d,p) basis set with the SMD<sup>3</sup> solvation model for THF. Frequency calculations were also conducted at the same level of theory to obtain vibrational frequencies to determine the identity of stationary points as intermediates or transition states, as well as obtaining the thermal corrections to enthalpy ( $H_{\text{correction}}$ ) and free energy ( $G_{\text{correction}}$ ) at the temperature of 298 K. All DFT calculations were with an ultrafine integration grid. All structural figures were generated with CYLview<sup>4</sup>. Distances in structural figures are shown in Å and energies are in kcal/mol.

### 6.2. DFT-computed Gibbs free-energy profiles for benzyl isocyanate<sup>a</sup>.

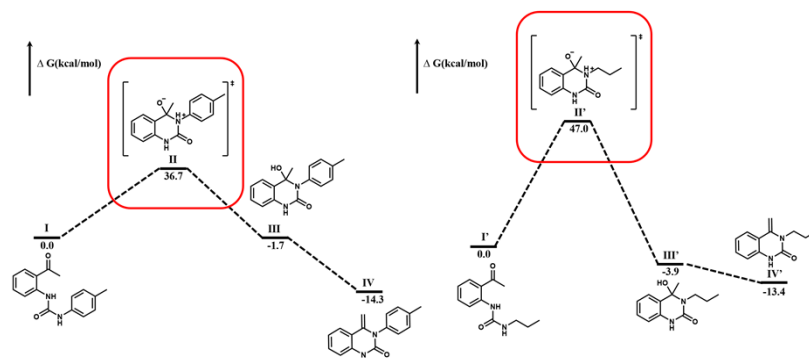

**Fig. S2.** DFT-computed Gibbs free-energy profiles for benzyl isocyanate<sup>a</sup>.

<sup>a</sup>Values are in kcal mol<sup>-1</sup>, obtained at the B3LYP/6-311G (d, p), SMD (THF) level of theory for the

intramolecular cyclization reaction sequence.

### 6.3. Cartesian Coordinates and Energies of Calculated Structures

---

| <b>1a</b> |            |            |            |
|-----------|------------|------------|------------|
| C         | -1.7478080 | 0.6324750  | -0.9503300 |
| C         | -0.3747320 | 0.7232540  | -0.8524250 |
| C         | 0.2446500  | 1.7972170  | -0.1659040 |
| C         | -0.5912570 | 2.8003440  | 0.4233040  |
| C         | -1.9908150 | 2.6644890  | 0.2992370  |
| C         | -2.5759000 | 1.6066510  | -0.3704940 |
| H         | -2.1876130 | -0.2043460 | -1.4828670 |
| H         | 0.2598250  | -0.0343390 | -1.3015730 |
| H         | -2.6294370 | 3.4175070  | 0.7431200  |
| H         | -3.6537810 | 1.5318110  | -0.4478440 |
| C         | -0.0122280 | 3.9557270  | 1.1352970  |
| O         | 1.2053300  | 4.1125760  | 1.2513750  |
| C         | -0.9380460 | 4.9918080  | 1.7451090  |
| H         | -1.5993170 | 4.5432090  | 2.4916820  |
| H         | -0.3271690 | 5.7574940  | 2.2219600  |
| H         | -1.5683180 | 5.4586970  | 0.9831110  |
| N         | 1.5967530  | 1.8365030  | -0.0750900 |
| H         | 2.1524490  | 1.1600230  | -0.5733190 |
| H         | 2.0264540  | 2.6416240  | 0.3586640  |

---

---

| <b>2a</b> |            |            |            |
|-----------|------------|------------|------------|
| C         | -1.4830410 | 0.2484440  | 0.0204360  |
| C         | -0.1032330 | 0.3026080  | 0.2369890  |
| C         | 0.6118370  | 1.4866130  | 0.0722000  |
| C         | -0.0521240 | 2.6497960  | -0.3170080 |
| C         | -1.4345380 | 2.6178440  | -0.5392930 |
| C         | -2.1317510 | 1.4287290  | -0.3702810 |
| H         | 0.4258090  | -0.5948410 | 0.5401140  |
| H         | 1.6813950  | 1.5174830  | 0.2427740  |
| H         | -1.9513740 | 3.5219320  | -0.8418910 |
| H         | -3.2029050 | 1.4171880  | -0.5456350 |
| C         | -2.2584370 | -1.0330350 | 0.1981380  |
| H         | -1.6066700 | -1.8525120 | 0.5075360  |
| H         | -3.0409670 | -0.9201350 | 0.9554260  |
| H         | -2.7527080 | -1.3285810 | -0.7330020 |
| N         | 0.6922260  | 3.8265250  | -0.4751240 |
| C         | 0.5479770  | 4.9801810  | -0.7758600 |
| O         | 0.5401720  | 6.1196050  | -1.0503910 |

---

---

| <b>I</b> |            |            |            |
|----------|------------|------------|------------|
| C        | -0.2292600 | 0.5643620  | -1.6018530 |
| C        | -0.9702690 | -0.1568460 | -0.6501360 |
| C        | -2.1498310 | 0.4359960  | -0.1045240 |
| C        | -2.5035880 | 1.7322580  | -0.5239570 |

---

---

|   |            |            |            |
|---|------------|------------|------------|
| C | -1.7533230 | 2.4371790  | -1.4496780 |
| C | -0.6147120 | 1.8374160  | -1.9909390 |
| H | 0.6443770  | 0.1128690  | -2.0489900 |
| H | -3.3956550 | 2.1906000  | -0.1185410 |
| H | -2.0527010 | 3.4325240  | -1.7548710 |
| H | -0.0220720 | 2.3632860  | -2.7314630 |
| C | -3.0261500 | -0.2816930 | 0.8586420  |
| O | -2.8637870 | -1.4706340 | 1.1293410  |
| C | -4.1617660 | 0.4668440  | 1.5240050  |
| H | -4.6302140 | -0.1974010 | 2.2491270  |
| H | -3.8063310 | 1.3683510  | 2.0293830  |
| H | -4.9106740 | 0.7732920  | 0.7878940  |
| N | -0.6054110 | -1.4386790 | -0.2487180 |
| H | -1.3675630 | -1.9594230 | 0.1808060  |
| C | 0.5046390  | -2.2221110 | -0.5577670 |
| N | 1.7377320  | -1.6078690 | -0.6487550 |
| H | 2.4328810  | -2.2312530 | -1.0396330 |
| C | 2.2654100  | -0.5048590 | 0.0721850  |
| C | 3.4134830  | 0.1162990  | -0.4349500 |
| C | 1.7266010  | -0.0450780 | 1.2764870  |
| C | 4.0047750  | 1.1720830  | 0.2483960  |
| H | 3.8414060  | -0.2374180 | -1.3672400 |
| C | 2.3200940  | 1.0269770  | 1.9401450  |
| H | 0.8541110  | -0.5229580 | 1.7025080  |
| C | 3.4654520  | 1.6574870  | 1.4462640  |
| H | 4.8985220  | 1.6316420  | -0.1620980 |
| H | 1.8850080  | 1.3678610  | 2.8742160  |
| O | 0.3828180  | -3.4255530 | -0.7290730 |
| C | 4.0925110  | 2.8270270  | 2.1638800  |
| H | 5.1817990  | 2.7355150  | 2.2004000  |
| H | 3.8648330  | 3.7709170  | 1.6556470  |
| H | 3.7240300  | 2.9077490  | 3.1889150  |

---

## II

---

|   |            |            |            |
|---|------------|------------|------------|
| C | -0.3020180 | -0.5436080 | 0.4122790  |
| C | 0.9780930  | -0.0900890 | 0.8209960  |
| C | 1.1581040  | 1.1814290  | 1.3217180  |
| C | 0.0577270  | 2.0515820  | 1.3979490  |
| C | -1.1821940 | 1.6676680  | 0.9258170  |
| C | -1.3812680 | 0.3843480  | 0.3767870  |
| H | 1.8087230  | -0.7845040 | 0.8084400  |
| H | 2.1328640  | 1.4980340  | 1.6718780  |
| H | 0.1852690  | 3.0495760  | 1.8021840  |
| H | -2.0096370 | 2.3692440  | 0.9264240  |
| C | -0.5056220 | -1.9447510 | 0.1810010  |
| N | -2.1177760 | -1.7797510 | -1.5598970 |
| C | -2.8521880 | -0.6469000 | -1.4333500 |
| N | -2.5768940 | 0.1260310  | -0.2587370 |
| H | -3.2236830 | 0.9060780  | -0.2278090 |
| O | -3.7549650 | -0.2274420 | -2.1547340 |
| O | -1.5681180 | -2.5470840 | 0.7250410  |

---

---

|   |            |            |            |
|---|------------|------------|------------|
| H | -2.1851930 | -2.5780030 | -0.0767480 |
| C | 0.5722310  | -2.8407270 | -0.3072530 |
| H | 0.9980720  | -3.3796010 | 0.5490750  |
| H | 0.1265820  | -3.5994300 | -0.9567690 |
| H | 1.3627240  | -2.3169680 | -0.8410750 |
| C | -2.0554930 | -2.4205800 | -2.8045660 |
| C | -1.9701710 | -3.8232140 | -2.8327410 |
| C | -1.9897110 | -1.7398690 | -4.0373590 |
| C | -1.8246020 | -4.5137350 | -4.0338430 |
| H | -2.0394150 | -4.3714470 | -1.8992820 |
| C | -1.8411110 | -2.4389260 | -5.2271220 |
| H | -2.0607130 | -0.6602490 | -4.0544340 |
| C | -1.7565800 | -3.8393070 | -5.2557500 |
| H | -1.7687500 | -5.5979230 | -4.0177970 |
| H | -1.7904440 | -1.8850380 | -6.1602570 |
| C | -1.6135200 | -4.5799520 | -6.5620650 |
| H | -0.7740880 | -4.1946750 | -7.1497700 |
| H | -1.4483110 | -5.6471320 | -6.3981100 |
| H | -2.5121860 | -4.4732270 | -7.1797870 |

---

### III

---

|   |            |            |            |
|---|------------|------------|------------|
| C | -2.6583300 | 0.3219700  | 1.4634160  |
| C | -1.3354500 | 0.2795450  | 1.0467470  |
| C | -0.7866850 | 1.3670240  | 0.3538460  |
| C | -1.5569810 | 2.5034950  | 0.0805200  |
| C | -2.8873500 | 2.5216890  | 0.5070970  |
| C | -3.4404610 | 1.4465740  | 1.1964360  |
| H | -3.0787290 | -0.5223590 | 1.9983900  |
| H | -0.7154770 | -0.5873310 | 1.2497500  |
| H | -3.5099120 | 3.3803090  | 0.2914990  |
| H | -4.4751130 | 1.4840350  | 1.5164540  |
| N | 0.5338310  | 1.3298280  | -0.0724500 |
| H | 1.0858520  | 0.5024620  | 0.1071470  |
| C | 1.2516300  | 2.4182220  | -0.5156090 |
| O | 2.4521470  | 2.3368540  | -0.7325350 |
| N | 0.5268140  | 3.5919130  | -0.6546380 |
| C | 1.2761860  | 4.7164080  | -1.1652660 |
| C | 1.8052380  | 5.6545930  | -0.2807890 |
| C | 1.4759420  | 4.8820050  | -2.5367120 |
| C | 2.5122550  | 6.7526140  | -0.7636020 |
| H | 1.6589330  | 5.5215080  | 0.7849990  |
| C | 2.1802150  | 5.9856070  | -3.0123370 |
| H | 1.0943500  | 4.1409600  | -3.2289840 |
| C | 2.7108060  | 6.9395200  | -2.1365490 |
| H | 2.9155730  | 7.4759200  | -0.0621290 |
| H | 2.3260670  | 6.1018710  | -4.0815630 |
| C | 3.5031460  | 8.1139130  | -2.6546070 |
| H | 3.1528930  | 8.4279130  | -3.6409060 |
| H | 3.4367230  | 8.9691810  | -1.9779780 |
| H | 4.5637900  | 7.8556200  | -2.7521450 |
| C | -0.9587860 | 3.6288340  | -0.7544060 |

---



|   |            |           |            |
|---|------------|-----------|------------|
| C | -1.4660640 | 5.0089620 | -0.3252620 |
| H | -1.0393040 | 5.7893290 | -0.9572040 |
| H | -2.5491700 | 5.0528820 | -0.4333730 |
| H | -1.2029750 | 5.2211640 | 0.7123340  |
| O | -1.3752000 | 3.3641420 | -2.1048550 |
| H | -1.2305690 | 4.1679730 | -2.6214570 |

---

**IV**

|   |             |            |            |
|---|-------------|------------|------------|
| C | -2.0326350  | -0.2184310 | -0.0135940 |
| C | -0.6852040  | -0.2654030 | -0.3932770 |
| C | 0.0658890   | 0.8997910  | -0.4194290 |
| C | -0.5195770  | 2.1172210  | -0.0608620 |
| C | -1.8560290  | 2.1575990  | 0.3116390  |
| C | -2.6441930  | 0.9970890  | 0.3338830  |
| H | -0.2430840  | -1.2190230 | -0.6610400 |
| H | 1.1087680   | 0.8596040  | -0.7127980 |
| H | 0.0657330   | 3.0290970  | -0.0688650 |
| H | -2.2930760  | 3.1055430  | 0.5972490  |
| N | -2.7853960  | -1.3843300 | 0.0226540  |
| H | -2.3483560  | -2.2636780 | -0.2175870 |
| C | -4.0811820  | -1.4816920 | 0.4705520  |
| N | -4.6825600  | -0.2780480 | 0.8263360  |
| C | -6.0469080  | -0.3675250 | 1.2905400  |
| C | -7.0992310  | -0.3775900 | 0.3766780  |
| C | -6.3111890  | -0.4272530 | 2.6546300  |
| C | -8.4108180  | -0.4556250 | 0.8328210  |
| H | -6.8878880  | -0.3278230 | -0.6853930 |
| C | -7.6289240  | -0.5038220 | 3.1028140  |
| H | -5.4891580  | -0.4173600 | 3.3613390  |
| C | -8.6989840  | -0.5200670 | 2.2028560  |
| H | -9.2242220  | -0.4687370 | 0.1142040  |
| H | -7.8260980  | -0.5556740 | 4.1685210  |
| C | -10.1259690 | -0.6103970 | 2.6837230  |
| H | -10.7184550 | 0.2374460  | 2.3255930  |
| H | -10.6091940 | -1.5200800 | 2.3127130  |
| H | -10.1782960 | -0.6227360 | 3.7742080  |
| O | -4.6541920  | -2.5561230 | 0.5446430  |
| C | -4.0771570  | 1.0056730  | 0.7015030  |
| C | -4.7833450  | 2.1311400  | 0.9144880  |
| H | -5.8270360  | 2.1126670  | 1.1897130  |
| H | -4.3179800  | 3.1001300  | 0.8118560  |

---

**2a'**

|   |            |            |            |
|---|------------|------------|------------|
| C | -1.1885880 | -0.1381950 | 0.2802190  |
| H | -0.9672320 | -1.1898790 | 0.4877520  |
| H | -1.0050180 | 0.0392130  | -0.7842130 |
| H | -2.2548060 | 0.0188320  | 0.4637330  |
| C | -0.3451250 | 0.7907230  | 1.1545360  |
| H | -0.5998050 | 1.8359250  | 0.9480630  |
| H | -0.5605570 | 0.6113510  | 2.2127540  |

|   |            |             |             |
|---|------------|-------------|-------------|
| C | 1. 1534630 | 0. 5918190  | 0. 9167480  |
| H | 1. 4068710 | 0. 7979750  | -0. 1279040 |
| H | 1. 4337390 | -0. 4431150 | 1. 1231090  |
| N | 1. 9749900 | 1. 4377610  | 1. 7687340  |
| C | 2. 1202620 | 2. 5910540  | 2. 0515480  |
| O | 2. 3630060 | 3. 6847440  | 2. 4126400  |

---

**I'**

|   |             |             |             |
|---|-------------|-------------|-------------|
| C | -0. 2775780 | 0. 5888170  | -1. 6949930 |
| C | -0. 9160450 | -0. 1271560 | -0. 6643430 |
| C | -2. 0795430 | 0. 4417390  | -0. 0565550 |
| C | -2. 5095290 | 1. 7109190  | -0. 4887930 |
| C | -1. 8569100 | 2. 4112160  | -1. 4885950 |
| C | -0. 7404490 | 1. 8315520  | -2. 0957640 |
| H | 0. 5778270  | 0. 1521380  | -2. 1906650 |
| H | -3. 3858310 | 2. 1508070  | -0. 0317890 |
| H | -2. 2146200 | 3. 3847870  | -1. 8010170 |
| H | -0. 2265000 | 2. 3505390  | -2. 8976790 |
| C | -2. 8635690 | -0. 2770660 | 0. 9804200  |
| O | -2. 6214080 | -1. 4417960 | 1. 2947140  |
| C | -4. 0101590 | 0. 4356940  | 1. 6678500  |
| H | -4. 4056750 | -0. 2220350 | 2. 4408000  |
| H | -3. 6863840 | 1. 3766780  | 2. 1199970  |
| H | -4. 8084400 | 0. 6672040  | 0. 9564940  |
| N | -0. 4634960 | -1. 3699930 | -0. 2426670 |
| H | -1. 1668150 | -1. 8973490 | 0. 2703220  |
| C | 0. 5971640  | -2. 1638130 | -0. 7139170 |
| N | 1. 8005580  | -1. 5491720 | -0. 9194220 |
| H | 2. 4914530  | -2. 1956070 | -1. 2798820 |
| O | 0. 4248180  | -3. 3603390 | -0. 9027930 |
| C | 2. 3498060  | -0. 4102640 | -0. 1759300 |
| H | 2. 6918520  | 0. 3551000  | -0. 8813850 |
| H | 1. 5522770  | 0. 0326330  | 0. 4197460  |
| C | 3. 5090530  | -0. 8268980 | 0. 7348230  |
| H | 4. 2764270  | -1. 3251860 | 0. 1303700  |
| H | 3. 1467840  | -1. 5656090 | 1. 4577170  |
| C | 4. 1252670  | 0. 3668000  | 1. 4664630  |
| H | 4. 9530670  | 0. 0490070  | 2. 1061470  |
| H | 4. 5158130  | 1. 1076020  | 0. 7613540  |
| H | 3. 3876630  | 0. 8674490  | 2. 1017820  |

---

**II'**

|   |             |             |             |
|---|-------------|-------------|-------------|
| C | -0. 5293690 | -0. 6781030 | 0. 0808170  |
| C | 0. 6126030  | -0. 8538080 | 0. 8695310  |
| C | 1. 3406890  | 0. 2332390  | 1. 3445810  |
| C | 0. 9335560  | 1. 5286850  | 1. 0275030  |
| C | -0. 1850600 | 1. 7274950  | 0. 2290650  |
| C | -0. 9117800 | 0. 6287890  | -0. 2433000 |
| H | 0. 9272380  | -1. 8551230 | 1. 1361000  |
| H | 2. 2146990  | 0. 0693290  | 1. 9641790  |

---

|   |            |            |            |
|---|------------|------------|------------|
| H | 1.4895620  | 2.3842780  | 1.3936560  |
| H | -0.5017900 | 2.7300460  | -0.0397110 |
| C | -1.4202750 | -1.8500220 | -0.2817770 |
| N | -2.3998160 | -1.4076610 | -1.6299660 |
| C | -2.6694590 | -0.0156850 | -1.8820910 |
| N | -2.0094030 | 0.8646260  | -1.0829240 |
| H | -2.2528210 | 1.8322320  | -1.2577240 |
| O | -3.4746410 | 0.3353720  | -2.7239970 |
| O | -2.4852580 | -2.0092220 | 0.5209510  |
| H | -3.0635050 | -1.7415310 | -0.6819590 |
| C | -0.6657570 | -3.1202050 | -0.6420450 |
| H | -0.2006160 | -3.4932670 | 0.2738130  |
| H | -1.3586500 | -3.8912790 | -0.9791690 |
| H | 0.1160710  | -2.9655860 | -1.3894970 |
| C | -2.4995630 | -2.2643240 | -2.8513970 |
| H | -1.5479850 | -2.7821510 | -2.9754880 |
| H | -2.6412690 | -1.6095930 | -3.7104980 |
| C | -3.6564070 | -3.2603270 | -2.7685140 |
| H | -4.5893690 | -2.7003940 | -2.6462350 |
| H | -3.5431690 | -3.8843690 | -1.8763410 |
| C | -3.7356370 | -4.1423600 | -4.0152070 |
| H | -4.5750160 | -4.8393460 | -3.9461350 |
| H | -3.8758140 | -3.5413130 | -4.9192680 |
| H | -2.8229180 | -4.7329930 | -4.1445740 |

---

### III'

---

|   |            |            |            |
|---|------------|------------|------------|
| C | -5.0149090 | 0.1060340  | 0.0752620  |
| C | -4.0839660 | 1.1286420  | -0.0304990 |
| C | -2.7135110 | 0.8287190  | -0.0598490 |
| C | -2.2779780 | -0.4977970 | 0.0014300  |
| C | -3.2323210 | -1.5111770 | 0.1264110  |
| C | -4.5920930 | -1.2227900 | 0.1601330  |
| H | -6.0721850 | 0.3457980  | 0.0998610  |
| H | -4.3997750 | 2.1654110  | -0.0810400 |
| H | -2.9012550 | -2.5392190 | 0.2112340  |
| H | -5.3153370 | -2.0240220 | 0.2565240  |
| N | -1.7751140 | 1.8456360  | -0.1347240 |
| H | -2.0807930 | 2.8080870  | -0.1123430 |
| C | -0.4081550 | 1.6669620  | -0.0874150 |
| O | 0.3424460  | 2.6381850  | -0.0487410 |
| N | 0.0432810  | 0.3711130  | -0.1151810 |
| C | -0.7971080 | -0.8485910 | -0.0378960 |
| C | -0.4827380 | -1.7689270 | -1.2281340 |
| H | 0.5705560  | -2.0617780 | -1.2294010 |
| H | -1.0878740 | -2.6753400 | -1.1743030 |
| H | -0.6995490 | -1.2597390 | -2.1686870 |
| O | -0.5261280 | -1.5392390 | 1.1900460  |
| H | 0.1830270  | -2.1742930 | 1.0335610  |
| C | 1.5055760  | 0.2062550  | -0.0379910 |
| H | 1.8827860  | 0.8939420  | 0.7215490  |
| H | 1.7109010  | -0.8030450 | 0.3206790  |

---

|   |           |            |            |
|---|-----------|------------|------------|
| C | 2.2462910 | 0.4543670  | -1.3569120 |
| H | 2.0277770 | 1.4708340  | -1.6928250 |
| H | 1.8698100 | -0.2283120 | -2.1250640 |
| C | 3.7574690 | 0.2744910  | -1.1963010 |
| H | 4.2779010 | 0.4566230  | -2.1407150 |
| H | 4.1634300 | 0.9706820  | -0.4551890 |
| H | 4.0080990 | -0.7408230 | -0.8702440 |

---

**IV'**

---

|   |            |            |            |
|---|------------|------------|------------|
| C | 2.5319070  | 0.7426740  | -0.2209540 |
| C | 3.8908400  | 1.0700590  | -0.1392440 |
| C | 4.8061770  | 0.1120560  | 0.2708560  |
| C | 4.3707680  | -1.1715480 | 0.6117610  |
| C | 3.0218670  | -1.4897900 | 0.5250450  |
| C | 2.0775560  | -0.5475260 | 0.0919050  |
| H | 4.2112390  | 2.0742580  | -0.3954120 |
| H | 5.8577730  | 0.3676790  | 0.3354180  |
| H | 5.0804270  | -1.9176540 | 0.9492250  |
| H | 2.6951300  | -2.4822210 | 0.8081400  |
| N | 1.6024410  | 1.6921540  | -0.6203180 |
| H | 1.9143950  | 2.6282660  | -0.8397900 |
| C | 0.2364020  | 1.5398110  | -0.5569110 |
| N | -0.2169200 | 0.2747320  | -0.2010260 |
| O | -0.5079480 | 2.4789270  | -0.8038670 |
| C | 0.6367170  | -0.8518050 | -0.0568630 |
| C | 0.1607370  | -2.1118810 | -0.0441860 |
| H | -0.8881010 | -2.3498830 | -0.1261160 |
| H | 0.8397190  | -2.9466440 | 0.0485730  |
| C | -1.6786230 | 0.0851650  | -0.1725600 |
| H | -1.9326330 | -0.7375530 | -0.8456680 |
| H | -2.1084900 | 0.9933200  | -0.5882270 |
| C | -2.2522080 | -0.1660470 | 1.2280730  |
| H | -3.3219850 | -0.3647450 | 1.0973030  |
| H | -1.8198340 | -1.0747310 | 1.6562610  |
| C | -2.0613250 | 1.0011480  | 2.1985480  |
| H | -2.5209850 | 0.7778960  | 3.1658760  |
| H | -1.0015860 | 1.2028170  | 2.3787330  |
| H | -2.5167960 | 1.9191400  | 1.8151490  |

---

1. M. J. Frisch, G. W. Trucks, H. B. Schlegel, G. E. Scuseria, M. A. Robb, J. R. Cheeseman, G. Scalmani, V. Barone, G. A. Petersson, H. Nakatsuji, X. Li, M. Caricato, A. V. Marenich, J. Bloino, B. G. Janesko, R. Gomperts, B. Mennucci, H. P. Hratchian, J. V. Ortiz, A. F. Izmaylov, J. L. Sonnenberg, D. Williams-Young, F. Ding, F. Lipparini, F. Egidi, J. Goings, B. Peng, A. Petrone, T. Henderson, D. Ranasinghe, V. G. Zakrzewski, J. Gao, N. Rega, G. Zheng, W. Liang,

- M. Hada, M. Ehara, K. Toyota, R. Fukuda, J. Hasegawa, M. Ishida, T. Nakajima, Y. Honda, O. Kitao, H. Nakai, T. Vreven, K. Throssell, J. A. Montgomery, Jr., J. E. Peralta, F. Ogliaro, M. J. Bearpark, J. J. Heyd, E. N. Brothers, K. N. Kudin, V. N. Staroverov, T. A. Keith, R. Kobayashi, J. Normand, K. Raghavachari, A. P. Rendell, J. C. Burant, S. S. Iyengar, J. Tomasi, M. Cossi, J. M. Millam, M. Klene, C. Adamo, R. Cammi, J. W. Ochterski, R. L. Martin, K. Morokuma, O. Farkas, J. B. Foresman, and D. J. Fox, Gaussian, Inc., Wallingford CT, 2016.
2. Chai, J.-D.; Head-Gordon, M. Long-range corrected hybrid density functionals with damped atom–atom dispersion corrections. *Phys. Chem. Chem. Phys.*, **2008**, 10(44), 6615–6620.
  3. (a) Barone, V.; Cossi, M. Quantum calculation of molecular energies and energy gradients in solution by a conductor solvent model. *J. Phys. Chem. A*, **1998**, 102(11), 1995–2001. (b) Cossi, M.; Rega, N.; Scalmani, G.; Barone, V. Energies, structures, and electronic properties of molecules in solution with the C-PCM solvation model. *J. Comput. Chem.*, **2003**, 24(6), 669–681.
  4. Legault, C. Y. CYLview, 1.0b; Universite' de Sherbrooke, 2009; <http://www.cylview.org>.
